# Supplementary material for: Asymmetric palladium-catalyzed decarboxylative [3 + 2] cycloaddition: straightforward construction of chiral spiro-heterocyclic scaffolds
Source: Royal Society of Chemistry journal article supplement (doi:10.1039/d3qo01939j), 2024-01-01
Supplement: d3qo01939j1.pdf [file d3qo01939j1.pdf]

**Asymmetric Palladium-Catalyzed Decarboxylative [3+2]  
Cycloaddition: Straightforward Construction of Chiral *Spiro*-  
heterocyclic Scaffolds**

Ke Zhang,<sup>2,3,4</sup> Peng-Yuan You,<sup>3,4</sup> Sheng Zuo,<sup>3,4</sup> Yuan Tao,<sup>3,4</sup> and Fen-Er Chen<sup>1,2,3,4\*</sup>

<sup>1</sup> *College of Chemistry and Chemical Engineering, Jiangxi Normal University, Nanchang, 330022, China*

<sup>2</sup> *Key Laboratory of Natural Medicines of the Changbai Mountain, Ministry of Education, College of Pharmacy, Yanbian University, Yanji, 133002, China.*

<sup>3</sup> *Engineering Center of Catalysis and Synthesis for Chiral Molecules, Fudan University, 200433 Shanghai, China*

<sup>4</sup> *Shanghai Engineering Center of Industrial Catalysis for Chiral Drugs, 200433 Shanghai, China*

\*Corresponding Author(s): [rfchen@fudan.edu.cn](mailto:rfchen@fudan.edu.cn)

|                                                                          |    |
|--------------------------------------------------------------------------|----|
| 1. General information .....                                             | 3  |
| 2. Supporting figures .....                                              | 4  |
| 3. General procedure for the synthesis of unsaturated pyrazolones .....  | 6  |
| 4. General procedure for preparation of racemic [3+2] cycloadducts ..... | 6  |
| 5. General procedure for asymmetric [3+2] cycloaddition .....            | 6  |
| 6. Characterization data of the products <b>3</b> .....                  | 8  |
| 7. Synthetic transforms of the enantioenriched <b>3a</b> .....           | 25 |
| 8. Crystal data for enantiopure products <b>3a</b> .....                 | 29 |
| 9. Reference .....                                                       | 32 |
| 10. The NMR spectra and HPLC chromatograms of compounds .....            | 33 |

## 1. General information

General Procedures. All commercial solvents and chemicals were purchased from Bidepharm, Leyan, Energy Chemical, and Adamas and used as received. Toluene was distilled and stored over 4Å molecular sieves. All reactions were performed in oven-dried glassware under a positive pressure of nitrogen. Column chromatography was performed over silica gel (200-300 mesh). TLC plates were visualized by exposure to UV light (254 nm).

Instrumentation. <sup>1</sup>H NMR spectra was recorded with a Bruker AM 400 (400 MHz) spectrometer. Chemical shifts are reported in parts per million (ppm) units on the delta ( $\delta$ ) scale, and are referenced from the residual protium in the CDCl<sub>3</sub> (7.26 ppm). Data are reported as follows: chemical shift [multiplicity (s = singlet, d = doublet, t = triplet, q = quartet, qd = quartet of doublet, m = multiplet), coupling constant (s) in Hertz, integration]. <sup>13</sup>C NMR spectra was recorded with a Bruker AM 400 (100 MHz) spectrometer. Chemical shifts are reported in parts per million (ppm) units on the delta ( $\delta$ ) scale, and are referenced from the carbon resonances of CDCl<sub>3</sub> (77.0 ppm). High-resolution mass spectra (HRMS) were recorded on on a Bruker microTOF Q III spectrometer using an electrospray ionization source (ESI). Melting point (MP) was obtained with Hanon MP-430. Optical rotations were measured on a Autopol I polarimeter. All HPLC analyses were performed on an Agilent 1220 Series HPLC system with n-hexane, isopropanol. IR datas of all compounds were determined by Thermo Fisher Scientific FT-IR (nicolet iS10).

## 2. Supporting figures

Figure S1. HRMS analysis of  $[\text{L1-Pd-dba-H}]^+$

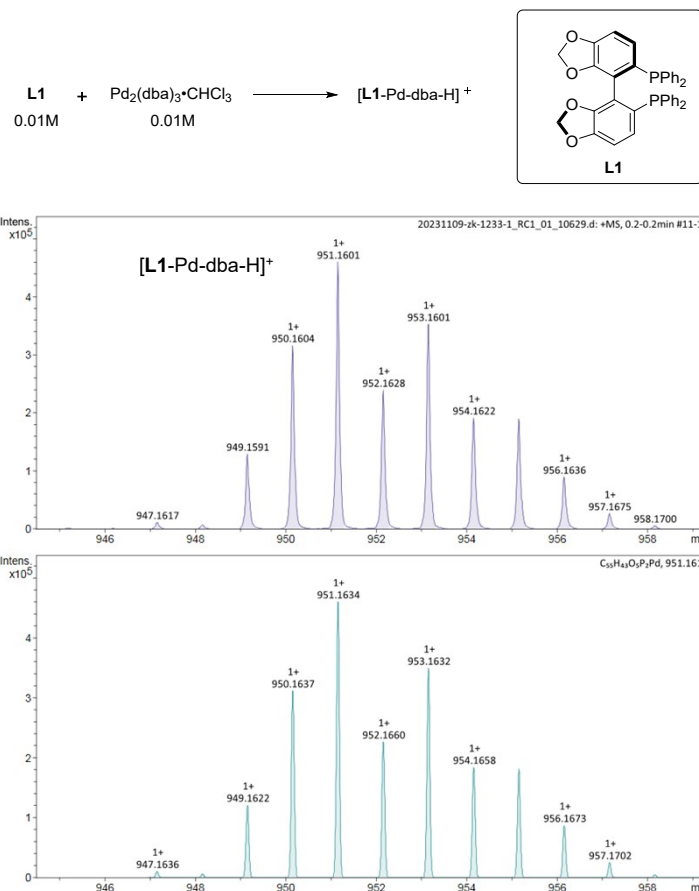

Figure S2. The binding interaction of  $\text{Pd}_2(\text{dba})_3 \cdot \text{CHCl}_3$  and **L1**

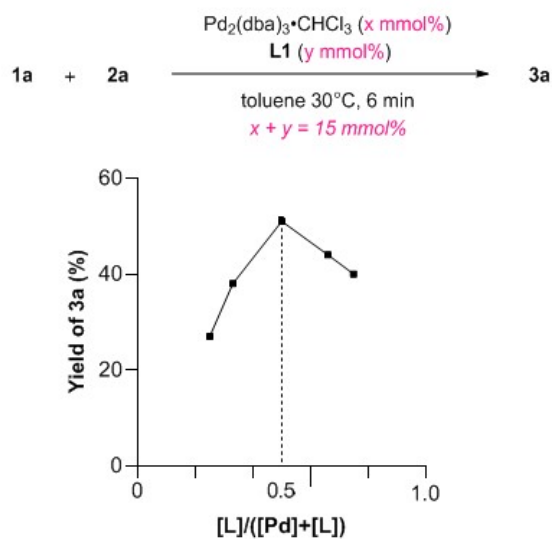

Figure S3. HRMS analysis of intermediate **Int-II**

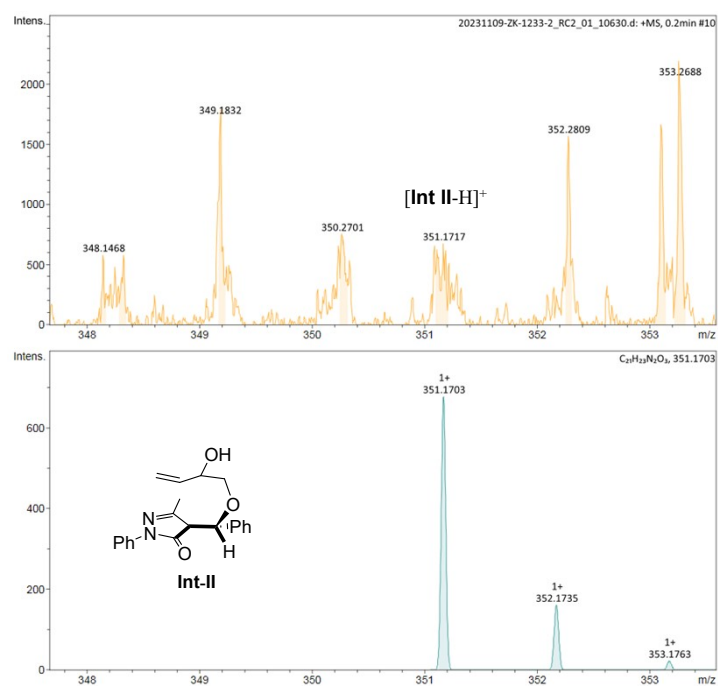

### 3. General procedure for the synthesis of unsaturated pyrazolones

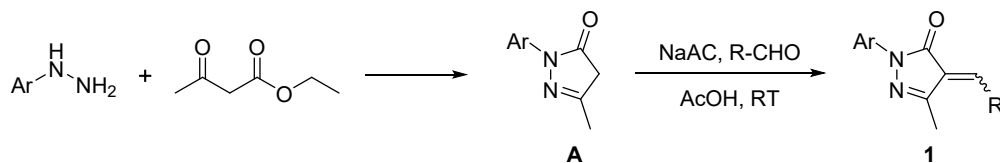

Phenylhydrazine (5.00 g, 46.24 mmol) was slowly added to the solution of ethyl acetoacetate (6.62 g, 50.86 mmol) at 0 °C. The resulting mixture was stirred for 1 h at 80 °C and for 1 h at 90 °C. Finally, the crude product was concentrated under reduced pressure to dryness and the residue was washed with diethyl ether (20 × 2 mL) giving pale yellow solids.<sup>1</sup>

To a solution of above product A (2.00 g, 11.50 mmol, 1.1 equiv) in acetic acid (26 mL) was added corresponding benzaldehyde (10.45 mmol, 1.0 equiv) and sodium acetic (0.94 g, 11.50 mmol, 1.1 equiv). The mixture was stirred at room temperature for 1-12 h. After the reaction was completed, H<sub>2</sub>O (26 mL) was added to reaction mixture. The aqueous layer extracted with CH<sub>2</sub>Cl<sub>2</sub> (3 × 20 mL). The combined organic layers were dried over Na<sub>2</sub>SO<sub>4</sub> then concentrated in vacuo. The product was obtained after quickly purified by flash column chromatography on silica gel (Petroleum / EtOAc). compounds **1a-1q** and **1t-1ae** were obtained exclusively in *Z*-form, and the compounds **1r** and **1s** were obtained in *Z/E*-isomers with 3:1 and 10:1 *Z/E*-ratios, respectively.<sup>2</sup>

### 4. General procedure for preparation of racemic [3+2] cycloadducts

Under argon atmosphere, to an oven dried Schlenk tube equipped with a magnetic stir bar, Pd<sub>2</sub>(dba)<sub>3</sub>·CHCl<sub>3</sub> (5.2 mg, 0.005 mmol, 5 mol%), dppe (1,2-bis(diphenylphosphino)ethane) (4.0 mg, 0.01 mmol, 10 mol%), **1a** (0.15 mmol) and **2a** (0.1 mmol) were added. Anhydrous 1 mL of toluene was added at 30 °C. The resulting mixture was stirred until the starting material was completely consumed (monitored by TLC) and then was concentrated to dryness. The residue was purified through flash column chromatography (Petroleum / EtOAc) to afford the corresponding cycloaddition products .

### 5. General procedure for asymmetric [3+2] cycloaddition

Under argon atmosphere, to an oven dried Schlenk tube equipped with a magnetic stir bar, Pd<sub>2</sub>(dba)<sub>3</sub>·CHCl<sub>3</sub> (5.2 mg, 0.005 mmol, 5 mol%), (*R*)-Segphos (6.1 mg, 0.01 mmol, 10 mol%), **1a**

(0.15 mmol) and **2a** (0.1 mmol) were added. Anhydrous 1 mL of toluene was added at 30 °C. The resulting mixture was stirred until the starting material was completely consumed (monitored by TLC) and then was concentrated to dryness. The residue was purified through flash column chromatography (Petroleum / EtOAc) to afford the corresponding cycloaddition products **3**.

## 6. Characterization data of the products 3

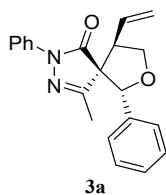

### (5*R*,6*R*,9*R*)-4-methyl-2,6-diphenyl-9-vinyl-7-oxa-2,3-diazaspiro[4.4]non-3-en-1-one (3a)

White solid, 28.0 mg, 85% yield, 3.5:1 *dr*, 98/66% *ee*.

**<sup>1</sup>H NMR** (400 MHz, Chloroform-*d*)  $\delta$  7.91 (d,  $J = 7.7$  Hz, 2H), 7.44 (t,  $J = 8.0$  Hz, 2H), 7.36 – 7.27 (m, 3H), 7.26 – 7.18 (m, 3H), 6.07 – 5.88 (m, 1H), 5.46 (s, 1H), 5.16 (dd,  $J = 13.8, 6.0$  Hz, 2H), 4.55 – 4.36 (m, 1H), 4.15 (dd,  $J = 10.0, 8.9$  Hz, 1H), 3.31 (dd,  $J = 17.1, 9.5$  Hz, 1H), 1.58 (s, 3H).

**<sup>13</sup>C NMR** (100 MHz, Chloroform-*d*)  $\delta$  172.9, 160.7, 137.9, 137.0, 131.7, 128.9, 128.6, 128.1, 125.2, 124.7, 120.0, 118.9, 87.1, 72.3, 68.6, 52.2, 14.7.

**IR:** 3078, 2856, 1698, 1591, 1488, 1324, 751, 708  $\text{cm}^{-1}$ ;

**HRMS** (ESI)  $m/z$  calcd for  $\text{C}_{21}\text{H}_{20}\text{N}_2\text{NaO}_2$   $[\text{M}+\text{Na}]^+$ : 355.1417, found: 355.1411.

**HPLC** (CHIRALPAK AD-H), *n*-hexane/isopropanol = 94/6, flow rate 1 mL/min, detection at 254 nm, major diastereomer:  $t_R = 6.8$  min (minor), 10.6 min (major), minor diastereomer:  $t_R = 8.5$  min (major), 13.5 min (minor).

$[\alpha]_D^{25} = 77.56$  ( $c = 0.26$  in  $\text{CHCl}_3$ ).

**Mp:** 154.6-155.4 °C.

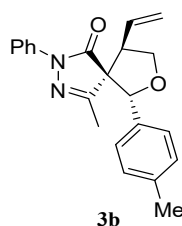

### (5*R*,6*R*,9*R*)-4-methyl-2-phenyl-6-(*p*-tolyl)-9-vinyl-7-oxa-2,3-diazaspiro[4.4]non-3-en-1-one

#### (3b)

White solid, 29.4 mg, 85% yield, 3.5:1 *dr*, 98/14% *ee*.

**<sup>1</sup>H NMR** (400 MHz, Chloroform-*d*)  $\delta$  8.01 – 7.84 (m, 2H), 7.52 – 7.36 (m, 2H), 7.27 – 7.18 (m, 1H), 7.12 (s, 4H), 5.99 (ddd,  $J = 16.9, 10.2, 9.2$  Hz, 1H), 5.43 (s, 1H), 5.23 – 5.05 (m, 2H), 4.45 (dd,  $J = 8.5, 7.6$  Hz, 1H), 4.13 (dd,  $J = 10.0, 8.8$  Hz, 1H), 3.31 (dd,  $J = 17.0, 9.6$  Hz, 1H), 2.34 (s, 3H), 1.61 (s, 3H).



$^{13}\text{C}$  NMR (100 MHz, Chloroform-*d*)  $\delta$  172.9, 160.9, 137.9, 137.8, 133.9, 131.8, 129.2, 128.9, 125.2, 124.6, 119.9, 118.9, 87.2, 72.3, 68.7, 52.2, 21.2, 14.8.

IR: 3075, 2853, 1698, 1593, 1490, 1365, 755, 690  $\text{cm}^{-1}$ ;

HRMS (ESI)  $m/z$  calcd for  $\text{C}_{22}\text{H}_{22}\text{N}_2\text{NaO}_2$   $[\text{M}+\text{Na}]^+$ : 369.1573, found: 369.1570.

HPLC (CHIRALPAK AD-H), *n*-hexane/isopropanol = 94/6, flow rate 1 mL/min, detection at 254 nm, major diastereomer:  $t_{\text{R}}$  = 7.1 min (minor), 9.3 min (major), minor diastereomer:  $t_{\text{R}}$  = 8.6 min (minor), 10.9 min (major).

$[\alpha]_{\text{D}}^{25} = +117.87$  ( $c = 0.44$  in  $\text{CHCl}_3$ ).

Mp: 115.4-116.8  $^{\circ}\text{C}$ .

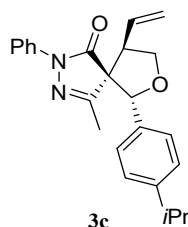

**(5R,6R,9R)-6-(4-isopropylphenyl)-4-methyl-2-phenyl-9-vinyl-7-oxa-2,3-diazaspiro[4.4]non-3-en-1-one (3c)**

Colorless oil, 29.9 mg, 80% yield, 3.8:1 *dr*, 98/71% *ee*.

$^1\text{H}$  NMR (400 MHz, Chloroform-*d*)  $\delta$  7.91 (d,  $J = 8.1$  Hz, 2H), 7.43 (t,  $J = 7.5$  Hz, 2H), 7.26 – 7.11 (m, 5H), 6.10 – 5.80 (m, 1H), 5.43 (s, 1H), 5.22 – 5.06 (m, 2H), 4.44 (t,  $J = 8.0$  Hz, 1H), 4.14 (t,  $J = 9.4$  Hz, 1H), 3.30 (q,  $J = 8.8$  Hz, 1H), 2.95 – 2.80 (m, 1H), 1.57 (s, 3H), 1.24 (d,  $J = 6.8$  Hz, 6H).

$^{13}\text{C}$  NMR (100 MHz, Chloroform-*d*)  $\delta$  173.0, 160.9, 148.9, 137.9, 134.3, 131.7, 128.9, 126.6, 125.2, 124.6, 120.0, 119.0, 87.1, 72.2, 68.7, 52.3, 33.8, 24.0, 14.7.

IR: 2959, 2868, 1705, 1596, 1500, 1367, 1071, 765, 691  $\text{cm}^{-1}$ ;

HRMS (ESI)  $m/z$  calcd for  $\text{C}_{24}\text{H}_{26}\text{N}_2\text{NaO}_2$   $[\text{M}+\text{Na}]^+$ : 397.1886, found: 397.1907.

HPLC (CHIRALPAK AD-H), *n*-hexane/isopropanol = 98/2, flow rate 0.6 mL/min, detection at 254 nm, major diastereomer:  $t_{\text{R}}$  = 9.4 min (minor), 14.1 min (major), minor diastereomer:  $t_{\text{R}}$  = 12.8 min (major), 16.7 min (minor).

$[\alpha]_{\text{D}}^{25} = +132.49$  ( $c = 0.40$ ,  $\text{CHCl}_3$ ).

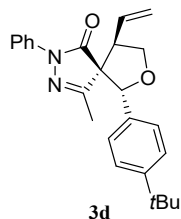

**(5R,6R,9R)-6-(4-(tert-butyl)phenyl)-4-methyl-2-phenyl-9-vinyl-7-oxa-2,3-diazaspiro[4.4]non-3-en-1-one (3d)**

White solid, 27.5 mg, 71% yield, 4:1 *dr*, 98/50% *ee*.

<sup>1</sup>H NMR (400 MHz, Chloroform-*d*)  $\delta$  7.94 – 7.88 (m, 2H), 7.47 – 7.39 (m, 2H), 7.35 – 7.31 (m, 2H), 7.26 – 7.19 (m, 1H), 7.15 (d, *J* = 8.1 Hz, 2H), 6.02 – 5.88 (m, 1H), 5.43 (s, 1H), 5.14 (dd, *J* = 9.5, 8.3 Hz, 2H), 4.44 (dd, *J* = 8.5, 7.5 Hz, 1H), 4.13 (dd, *J* = 10.1, 8.8 Hz, 1H), 3.30 (dd, *J* = 17.0, 9.6 Hz, 1H), 1.56 (s, 3H), 1.30 (s, 9H).

<sup>13</sup>C NMR (100 MHz, Chloroform-*d*)  $\delta$  173.0, 160.9, 151.1, 137.9, 134.0, 131.7, 128.9, 125.4, 125.2, 124.4, 120.0, 119.0, 87.1, 72.2, 68.6, 52.3, 34.6, 31.3, 14.7.

IR: 2962, 2866, 1705, 1596, 1500, 1367, 1071, 765, 691 cm<sup>-1</sup>;

HRMS (ESI) *m/z* calcd for C<sub>25</sub>H<sub>28</sub>N<sub>2</sub>NaO<sub>2</sub> [M+Na]<sup>+</sup>: 411.2043, found: 411.2040.

HPLC (CHIRALPAK AD-H), *n*-hexane/isopropanol = 98/2, flow rate 0.6 mL/min, detection at 254 nm, major diastereomer: *t*<sub>R</sub> = 8.5 min (minor), 9.0 min (major), minor diastereomer: *t*<sub>R</sub> = 10.8 min (minor), 11.9 min (major).

$[\alpha]_{\text{D}}^{25} = 125.91$  (*c* = 0.40, CHCl<sub>3</sub>).

Mp: 95.6-96.2 °C.

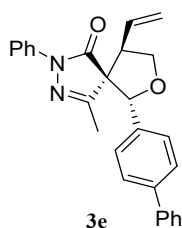

**(5R,6R,9R)-6-([1,1'-biphenyl]-4-yl)-4-methyl-2-phenyl-9-vinyl-7-oxa-2,3-diazaspiro[4.4]non-3-en-1-one (3e)**

White solid, 33.0 mg, 81% yield, 4:1 *dr*, 98/74% *ee*.

<sup>1</sup>H NMR (400 MHz, Chloroform-*d*)  $\delta$  7.96 – 7.91 (m, 2H), 7.62 – 7.55 (m, 4H), 7.49 – 7.42 (m, 4H), 7.40 – 7.34 (m, 1H), 7.32 (d, *J* = 8.0 Hz, 2H), 7.27 – 7.21 (m, 1H), 6.14 – 5.91 (m, 1H), 5.50

(s, 1H), 5.26 – 5.08 (m, 2H), 4.49 (dd,  $J = 8.6, 7.6$  Hz, 1H), 4.17 (dd,  $J = 10.0, 8.8$  Hz, 1H), 3.35 (dd,  $J = 17.0, 9.6$  Hz, 1H), 1.66 (s, 3H).

$^{13}\text{C NMR}$  (100 MHz, Chloroform- $d$ )  $\delta$  172.8, 160.7, 140.9, 140.4, 137.9, 136.0, 131.7, 128.9, 128.8, 127.5, 127.2, 127.0, 125.3, 125.1, 120.0, 119.0, 87.1, 72.4, 68.7, 52.3, 14.9.

**IR:** 3028, 2856, 1687, 1595, 1499, 1368, 740, 689  $\text{cm}^{-1}$ ;

**HRMS** (ESI)  $m/z$  calcd for  $\text{C}_{27}\text{H}_{24}\text{N}_2\text{NaO}_2$   $[\text{M}+\text{Na}]^+$ : 431.1730, found: 431.1714.

**HPLC** (CHIRALPAK IA-H),  $n$ -hexane/isopropanol = 98/2, flow rate 1 mL/min, detection at 254 nm, major diastereomer:  $t_{\text{R}} = 12.1$  min (major), 13.4 min (minor), minor diastereomer:  $t_{\text{R}} = 15.2$  min (minor), 26.3 min (major).

$[\alpha]_{\text{D}}^{25} = +224.60$  ( $c = 0.46$ ,  $\text{CHCl}_3$ ).

**Mp:** 110.7-111.9  $^{\circ}\text{C}$ .

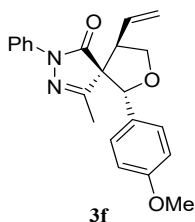

**(5R,6R,9R)-6-(4-methoxyphenyl)-4-methyl-2-phenyl-9-vinyl-7-oxa-2,3-diazaspiro[4.4]non-3-en-1-one (3f)**

White solid, 27.9 mg, 77% yield, 3:1 *dr*, 95/86% *ee*.

$^1\text{H NMR}$  (400 MHz, Chloroform- $d$ )  $\delta$  7.96 – 7.88 (m, 2H), 7.47 – 7.39 (m, 2H), 7.25 – 7.19 (m, 1H), 7.16 (d,  $J = 8.4$  Hz, 2H), 6.91 – 6.82 (m, 2H), 6.14 – 5.91 (m, 1H), 5.40 (s, 1H), 5.23 – 5.08 (m, 2H), 4.45 (dd,  $J = 8.6, 7.6$  Hz, 1H), 4.13 (dd,  $J = 10.0, 8.8$  Hz, 1H), 3.80 (s, 3H), 3.31 (dd,  $J = 17.0, 9.5$  Hz, 1H), 1.63 (s, 3H).

$^{13}\text{C NMR}$  (100 MHz, Chloroform- $d$ )  $\delta$  172.9, 160.9, 159.3, 137.9, 131.8, 129.0, 128.9, 125.9, 125.2, 119.9, 118.9, 113.9, 87.1, 72.3, 68.7, 55.2, 52.1, 14.9.

**IR:** 3021, 2858, 1694, 1505, 1330, 1224, 1066, 838, 717  $\text{cm}^{-1}$ ;

**HRMS** (ESI)  $m/z$  calcd for  $\text{C}_{22}\text{H}_{22}\text{N}_2\text{NaO}_3$   $[\text{M}+\text{Na}]^+$ : 385.1522, found: 385.1524.

**HPLC** (CHIRALPAK AD-H),  $n$ -hexane/isopropanol = 94/6, flow rate 1 mL/min, detection at 254 nm, major diastereomer:  $t_{\text{R}} = 10.2$  min (minor), 11.3 min (major), minor diastereomer:  $t_{\text{R}} = 13.1$  min (minor), 14.4 min (major).

$[\alpha]_D^{25} = +62.07$  ( $c = 0.34$ ,  $\text{CHCl}_3$ ).

**Mp:** 129.1-130.3 °C.

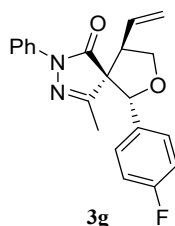

**(5R,6R,9R)-6-(4-fluorophenyl)-4-methyl-2-phenyl-9-vinyl-7-oxa-2,3-diazaspiro[4.4]non-3-en-1-one (3g)**

White solid, 31.5 mg, 90% yield, 3.8:1 *dr*, 97/20% *ee*.

$^1\text{H NMR}$  (400 MHz, Chloroform-*d*)  $\delta$  7.94 – 7.87 (m, 2H), 7.48 – 7.39 (m, 2H), 7.27 – 7.19 (m, 3H), 7.07 – 6.98 (m, 2H), 5.99 (ddd,  $J = 16.9, 10.2, 9.2$  Hz, 1H), 5.41 (s, 1H), 5.16 (ddd,  $J = 12.8, 8.4, 0.9$  Hz, 2H), 4.46 (dd,  $J = 8.6, 7.5$  Hz, 1H), 4.12 (dd,  $J = 10.0, 8.9$  Hz, 1H), 3.31 (dd,  $J = 17.0, 9.5$  Hz, 1H), 1.63 (s, 3H).

$^{13}\text{C NMR}$  (100 MHz, Chloroform-*d*)  $\delta$  172.6, 162.4 (d,  $J = 246.8$  Hz), 160.5, 137.8, 132.7 (d,  $J = 3.2$  Hz), 131.6, 128.9, 126.4 (d,  $J = 8.1$  Hz), 125.3, 120.1, 118.9, 115.6 (d,  $J = 21.6$  Hz), 86.7, 72.4, 68.6, 52.2, 14.8.

**IR:** 3075, 2854, 1699, 1592, 1489, 1351, 1229, 755, 691  $\text{cm}^{-1}$ ;

**HRMS** (ESI)  $m/z$  calcd for  $\text{C}_{21}\text{H}_{19}\text{FN}_2\text{NaO}_2$   $[\text{M}+\text{Na}]^+$ : 373.1323, found: 373.1325.

**HPLC** (CHIRALPAK AD-H), *n*-hexane/isopropanol = 94/6, flow rate 1 mL/min, detection at 254 nm, major diastereomer:  $t_R = 6.9$  min (minor), 7.6 min (major), minor diastereomer:  $t_R = 8.9$  min (minor), 10.8 min (major).

$[\alpha]_D^{25} = +79.44$  ( $c = 0.42$ ,  $\text{CHCl}_3$ ).

**Mp:** 134.4-135.3 °C.

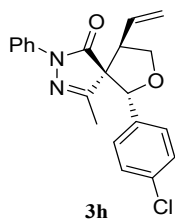

**(5R,6R,9R)-6-(4-chlorophenyl)-4-methyl-2-phenyl-9-vinyl-7-oxa-2,3-diazaspiro[4.4]non-3-en-1-one (3h)**

White solid, 29.3 mg, 80% yield, 3.7:1 *dr*, 97/78% *ee*.

**<sup>1</sup>H NMR** (400 MHz, Chloroform-*d*)  $\delta$  7.95 – 7.87 (m, 2H), 7.46 – 7.39 (m, 2H), 7.27 – 7.19 (m, 2H), 6.98 (dd, *J* = 5.0, 3.6 Hz, 1H), 6.83 (dt, *J* = 3.6, 1.1 Hz, 1H), 6.05 – 5.87 (m, 1H), 5.62 (d, *J* = 0.6 Hz, 1H), 5.23 – 4.96 (m, 2H), 4.45 (dd, *J* = 8.7, 7.6 Hz, 1H), 4.16 (dd, *J* = 9.8, 8.9 Hz, 1H), 3.49 – 3.29 (m, 1H), 1.72 (s, 3H).

**<sup>13</sup>C NMR** (100 MHz, Chloroform-*d*)  $\delta$  172.5, 160.4, 137.7, 135.4, 133.9, 131.6, 128.9, 128.8, 126.1, 125.3, 120.1, 118.9, 86.6, 72.4, 68.5, 52.2, 14.9.

**IR:** 3083, 2851, 1701, 1593, 1488, 1367, 1082, 762, 693 cm<sup>-1</sup>;

**HRMS** (ESI) *m/z* calcd for C<sub>21</sub>H<sub>19</sub>ClN<sub>2</sub>NaO<sub>2</sub> [M+Na]<sup>+</sup>: 389.1027, found: 389.1007.

**HPLC** (CHIRALPAK IA-H), *n*-hexane/isopropanol = 98/2, flow rate 1 mL/min, detection at 254 nm, major diastereomer: *t<sub>R</sub>* = 8.6 min (minor), 9.4 min (major), minor diastereomer: *t<sub>R</sub>* = 11.0 min (minor), 11.9 min (major).

**$[\alpha]_D^{25}$**  = + 139.01 (*c* = 0.40, CHCl<sub>3</sub>).

**Mp:** 160.0-161.4 °C.

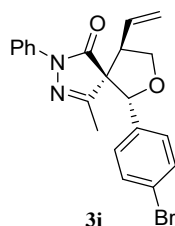

**(5*R*,6*R*,9*R*)-6-(4-bromophenyl)-4-methyl-2-phenyl-9-vinyl-7-oxa-2,3-diazaspiro[4.4]non-3-en-1-one (3i)**

White solid, 28.7 mg, 70% yield, 3.8:1 *dr*, 98/73% *ee*.

**<sup>1</sup>H NMR** (400 MHz, Chloroform-*d*)  $\delta$  7.90 (d, *J* = 8.1 Hz, 2H), 7.44 (dd, *J* = 13.4, 7.6 Hz, 4H), 7.23 (t, *J* = 7.3 Hz, 1H), 7.11 (d, *J* = 7.9 Hz, 2H), 6.11 – 5.88 (m, 1H), 5.37 (s, 1H), 5.23 – 5.09 (m, 2H), 4.45 (t, *J* = 8.1 Hz, 1H), 4.10 (t, *J* = 9.4 Hz, 1H), 3.29 (q, *J* = 8.9 Hz, 1H), 1.64 (s, 3H).

**<sup>13</sup>C NMR** (100 MHz, Chloroform-*d*)  $\delta$  172.5, 160.4, 137.7, 135.9, 131.7, 131.6, 128.9, 126.4, 125.3, 122.0, 120.1, 118.9, 86.6, 72.4, 68.5, 52.2, 14.9.

**IR:** 3083, 2860, 1691, 1595, 1489, 1364, 780, 754, 693 cm<sup>-1</sup>;

**HRMS** (ESI) *m/z* calcd for C<sub>21</sub>H<sub>19</sub>BrN<sub>2</sub>NaO<sub>2</sub> [M+Na]<sup>+</sup>: 433.0522, found: 433.0521.

**HPLC** (CHIRALPAK IA-H), *n*-hexane/isopropanol = 98/2, flow rate 1 mL/min, detection at 254

nm, major diastereomer:  $t_R = 9.9$  min (minor), 10.8 min (major), minor diastereomer:  $t_R = 12.8$  min (minor), 14.1 min (major).

$[\alpha]_D^{25} = 164.30$  ( $c = 0.40$ ,  $\text{CHCl}_3$ ).

**Mp:** 156.2-156.8 °C.

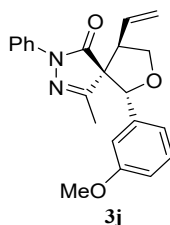

**(5R,6R,9R)-6-(3-methoxyphenyl)-4-methyl-2-phenyl-9-vinyl-7-oxa-2,3-diazaspiro[4.4]non-3-en-1-one (3j)**

Colorless oil, 24.2 mg, 67% yield, 2.5:1 *dr*, 94/80% *ee*.

**$^1\text{H NMR}$**  (400 MHz, Chloroform-*d*)  $\delta$  7.91 (dd,  $J = 8.7, 1.1$  Hz, 2H), 7.47 – 7.36 (m, 2H), 7.26 – 7.16 (m, 2H), 6.85 – 6.74 (m, 3H), 6.09 – 5.89 (m, 1H), 5.42 (s, 1H), 5.23 – 5.07 (m, 2H), 4.45 (dd,  $J = 8.6, 7.6$  Hz, 1H), 4.13 (dd,  $J = 10.1, 8.8$  Hz, 1H), 3.72 (s, 3H), 3.30 (dd,  $J = 17.0, 9.5$  Hz, 1H), 1.62 (s, 3H).

**$^{13}\text{C NMR}$**  (100 MHz, Chloroform-*d*)  $\delta$  172.8, 160.7, 159.7, 138.6, 137.8, 131.7, 129.7, 128.9, 125.2, 120.0, 118.9, 116.9, 113.9, 109.9, 87.0, 72.3, 68.6, 55.2, 52.1, 14.8.

**IR:** 2926, 2859, 1689, 1595, 1489, 1366, 1278, 1067, 995, 758, 692  $\text{cm}^{-1}$ ;

**HRMS** (ESI)  $m/z$  calcd for  $\text{C}_{22}\text{H}_{22}\text{N}_2\text{NaO}_3$   $[\text{M}+\text{Na}]^+$ : 385.1523, found: 385.1520.

**HPLC** (CHIRALPAK AD-H), *n*-hexane/isopropanol = 94/6, flow rate 1 mL/min, detection at 254 nm, major diastereomer:  $t_R = 7.7$  min (minor), 17.2 min (major), minor diastereomer:  $t_R = 10.7$  min (major), 20.3 min (minor).

$[\alpha]_D^{25} = +113.72$  ( $c = 0.20$ ,  $\text{CHCl}_3$ ).

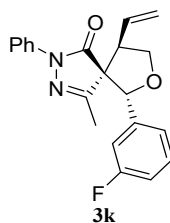

**(5R,6R,9R)-6-(3-fluorophenyl)-4-methyl-2-phenyl-9-vinyl-7-oxa-2,3-diazaspiro[4.4]non-3-en-1-one (3k)**

White solid, 26.6 mg, 76% yield, 2.5:1 *dr*, 94/71% *ee*.

**<sup>1</sup>H NMR** (400 MHz, Chloroform-*d*)  $\delta$  7.90 (dd,  $J = 8.7, 1.0$  Hz, 2H), 7.48 – 7.38 (m, 2H), 7.31 – 7.19 (m, 2H), 7.07 (d,  $J = 9.7$  Hz, 1H), 6.99 (td,  $J = 8.4, 2.5$  Hz, 1H), 6.91 (d,  $J = 7.7$  Hz, 1H), 6.05 – 5.88 (m, 1H), 5.42 (s, 1H), 5.25 – 5.05 (m, 2H), 4.45 (dd,  $J = 8.6, 7.5$  Hz, 1H), 4.13 (dd,  $J = 10.0, 8.9$  Hz, 1H), 3.30 (dd,  $J = 17.0, 9.5$  Hz, 1H), 1.62 (s, 3H).

**<sup>13</sup>C NMR** (100 MHz, Chloroform-*d*)  $\delta$  172.6, 162.9 (d,  $J = 247.0$  Hz), 160.3, 139.6 (d,  $J = 7.3$  Hz), 137.7, 131.4, 130.3 (d,  $J = 8.2$  Hz), 128.9, 125.3, 120.3 (d,  $J = 3.0$  Hz), 120.2, 119.0, 115.0 (d,  $J = 21.2$  Hz), 112.1 (d,  $J = 23.0$  Hz), 86.3, 86.3, 72.3, 68.5, 52.2, 14.7.

**IR:** 2922, 2859, 1697, 1590, 1486, 1367, 1271, 787, 736  $\text{cm}^{-1}$ ;

**HRMS** (ESI)  $m/z$  calcd for  $\text{C}_{21}\text{H}_{19}\text{FN}_2\text{NaO}_2$   $[\text{M}+\text{Na}]^+$ : 373.1323, found: 373.1310.

**HPLC** (CHIRALPAK AD-H), *n*-hexane/isopropanol = 90/10, flow rate 1 mL/min, detection at 254 nm, major diastereomer:  $t_R = 5.4$  min (minor), 7.9 min (major), minor diastereomer:  $t_R = 6.6$  min (major), 9.5 min (minor).

$[\alpha]_D^{25} = +78.94$  ( $c = 0.34$ ,  $\text{CHCl}_3$ ).

**Mp:** 114.3-114.9 °C.

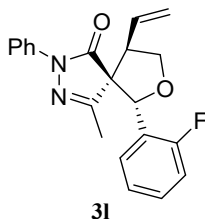

**(5R,6S,9R)-6-(2-fluorophenyl)-4-methyl-2-phenyl-9-vinyl-7-oxa-2,3-diazaspiro[4.4]non-3-en-1-one (31)**

Light yellow solid, 21.0 mg, 60% yield, 2.4:1 *dr*, 93/78% *ee*.

**<sup>1</sup>H NMR** (400 MHz, Chloroform-*d*)  $\delta$  7.90 (dd,  $J = 8.7, 1.0$  Hz, 2H), 7.49 – 7.37 (m, 2H), 7.32 – 7.20 (m, 2H), 7.11 – 6.85 (m, 3H), 5.97 (ddd,  $J = 16.9, 10.2, 9.2$  Hz, 1H), 5.42 (s, 1H), 5.28 – 5.05 (m, 2H), 4.46 (dd,  $J = 8.6, 7.6$  Hz, 1H), 4.13 (dd,  $J = 10.0, 8.9$  Hz, 1H), 3.30 (dd,  $J = 17.0, 9.5$  Hz, 1H), 1.62 (s, 3H).

**<sup>13</sup>C NMR** (100 MHz, Chloroform-*d*)  $\delta$  172.6, 162.9 (d,  $J = 247.0$  Hz), 160.3, 139.7 (d,  $J = 7.3$  Hz), 137.7, 131.4, 130.3 (d,  $J = 8.2$  Hz), 128.9, 125.3, 120.3 (d,  $J = 3.0$  Hz), 120.2, 119.0, 115.0 (d,  $J = 21.1$  Hz), 112.1 (d,  $J = 23.0$  Hz), 86.3, 86.3, 72.3, 68.5, 52.3, 14.7.

**IR:** 3081, 2987, 2855, 1698, 1593, 1490, 1368, 1250, 759, 652 cm<sup>-1</sup>;

**HRMS** (ESI) *m/z* calcd for C<sub>21</sub>H<sub>19</sub>FN<sub>2</sub>NaO<sub>2</sub> [M+Na]<sup>+</sup>: 373.1323, found: 373.1320.

**HPLC** (CHIRALPAK AD-H), *n*-hexane/isopropanol = 94/6, flow rate 1 mL/min, detection at 254 nm, major diastereomer: *t<sub>R</sub>* = 6.3 min (minor), 9.6 min (major), minor diastereomer: *t<sub>R</sub>* = 7.9 min (major), 12.1 min (minor).

$[\alpha]_{\text{D}}^{25} = 77.89$  (*c* = 0.28, CHCl<sub>3</sub>).

**Mp:** 109.9-110.9 °C.

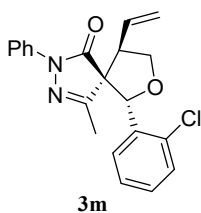

**(5R,6S,9R)-6-(2-chlorophenyl)-4-methyl-2-phenyl-9-vinyl-7-oxa-2,3-diazaspiro[4.4]non-3-en-1-one (3m)**

White solid, 24.2 mg, 66% yield, 2:1 *dr*, 96/90% *ee*.

**<sup>1</sup>H NMR** (400 MHz, Chloroform-*d*) δ 7.87 (d, *J* = 7.8 Hz, 2H), 7.79 (d, *J* = 7.2 Hz, 1H), 7.43 (t, *J* = 7.4 Hz, 2H), 7.40 – 7.30 (m, 3H), 7.22 (t, *J* = 7.0 Hz, 1H), 5.87 – 5.59 (m, 2H), 5.18 (d, *J* = 12.3 Hz, 2H), 4.35 (dd, *J* = 18.9, 8.0 Hz, 2H), 3.24 (dd, *J* = 17.2, 8.9 Hz, 1H), 1.38 (s, 3H).

**<sup>13</sup>C NMR** (100 MHz, Chloroform-*d*) δ 173.8, 158.5, 137.8, 136.1, 131.6, 129.6, 129.5, 129.3, 128.9, 127.7, 126.8, 125.2, 121.1, 119.1, 83.5, 71.0, 67.7, 53.9, 14.3.

**IR:** 2918, 2872, 1699, 1590, 1498, 1329, 1270, 1080, 761, 688 cm<sup>-1</sup>;

**HRMS** (ESI) *m/z* calcd for C<sub>21</sub>H<sub>19</sub>ClN<sub>2</sub>NaO<sub>2</sub> [M+Na]<sup>+</sup>: 389.1024, found: 389.1027.

**HPLC** (CHIRALPAK AD-H), *n*-hexane/isopropanol = 94/6, flow rate 1 mL/min, detection at 254 nm, major diastereomer: *t<sub>R</sub>* = 7.0 min (minor), 8.1 min (major), minor diastereomer: *t<sub>R</sub>* = 8.8 min (major), 10.6 min (minor).

$[\alpha]_{\text{D}}^{25} = 63.50$  (*c* = 0.20, CHCl<sub>3</sub>).

**Mp:** 124.1-124.9 °C.



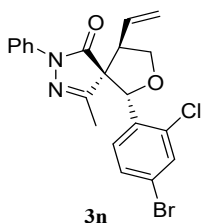

**(5R,6S,9R)-6-(4-bromo-2-chlorophenyl)-4-methyl-2-phenyl-9-vinyl-7-oxa-2,3-diazaspiro[4.4]non-3-en-1-one (3n)**

Colorless oil, 29.7 mg, 67% yield, 3:1 *dr*, 96/20% *ee*.

$^1\text{H NMR}$  (400 MHz, Chloroform-*d*)  $\delta$  7.90 – 7.82 (m, 2H), 7.67 (dd,  $J = 8.6, 0.8$  Hz, 1H), 7.52 – 7.48 (m, 2H), 7.46 – 7.38 (m, 2H), 7.25 – 7.19 (m, 1H), 5.84 – 5.67 (m, 1H), 5.61 (s, 1H), 5.27 – 5.06 (m, 2H), 4.42 – 4.18 (m, 2H), 3.31 – 3.12 (m, 1H), 1.45 (s, 3H).

$^{13}\text{C NMR}$  (100 MHz, Chloroform-*d*)  $\delta$  173.6, 158.1, 137.7, 135.3, 132.4, 132.1, 130.1, 129.4, 129.0, 128.9, 125.3, 122.3, 121.3, 119.1, 83.2, 71.0, 67.6, 53.9, 14.6.

**IR:** 3081, 2872, 1706, 1596, 1500, 1368, 1272, 1078, 757, 690  $\text{cm}^{-1}$ ;

**HRMS** (ESI)  $m/z$  calcd for  $\text{C}_{21}\text{H}_{18}\text{BrClN}_2\text{NaO}_2$   $[\text{M}+\text{Na}]^+$ : 467.0132, found: 467.0154.

**HPLC** (CHIRALPAK AD-H), *n*-hexane/isopropanol = 94/6, flow rate 1 mL/min, detection at 254 nm, major diastereomer:  $t_R = 6.6$  min (minor), 7.6 min (major), minor diastereomer:  $t_R = 8.4$  min (minor), 9.5 min (major).

$[\alpha]_D^{25} = +53.49$  ( $c = 0.34$ ,  $\text{CHCl}_3$ ).

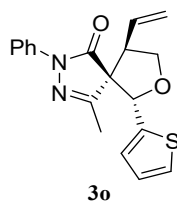

**(5R,6S,9R)-4-methyl-2-phenyl-6-(thiophen-2-yl)-9-vinyl-7-oxa-2,3-diazaspiro[4.4]non-3-en-1-one (3o)**

White solid, 21.3 mg, 63% yield, 3:1 *dr*, 95/70% *ee*.

$^1\text{H NMR}$  (400 MHz, Chloroform-*d*)  $\delta$  7.96 – 7.86 (m, 2H), 7.46 – 7.39 (m, 2H), 7.28 – 7.20 (m, 2H), 6.98 (dd,  $J = 5.0, 3.6$  Hz, 1H), 6.83 (dt,  $J = 3.6, 1.1$  Hz, 1H), 6.03 – 5.87 (m, 1H), 5.62 (d,  $J = 0.6$  Hz, 1H), 5.25 – 5.09 (m, 2H), 4.45 (dd,  $J = 8.7, 7.6$  Hz, 1H), 4.16 (dd,  $J = 9.8, 8.9$  Hz, 1H), 3.39 (dd,  $J = 17.0, 9.4$  Hz, 1H), 1.72 (s, 3H).

$^{13}\text{C NMR}$  (100 MHz, Chloroform-*d*)  $\delta$  172.2, 160.2, 140.0, 137.8, 131.4, 128.9, 127.3, 125.3, 124.7,

123.3, 120.1, 118.9, 84.2, 72.4, 68.6, 51.9, 14.7.

**IR:** 3080, 2858, 1698, 1591, 1488, 1366, 1325, 1269, 1060, 731, 709, 690  $\text{cm}^{-1}$ ;

**HRMS** (ESI)  $m/z$  calcd for  $\text{C}_{19}\text{H}_{18}\text{N}_2\text{NaO}_2\text{S}$   $[\text{M}+\text{Na}]^+$ : 361.0981, found: 361.0986.

**HPLC** (CHIRALPAK AD-H), *n*-hexane/isopropanol = 94/6, flow rate 1 mL/min, detection at 254 nm, major diastereomer:  $t_R$  = 7.8 min (minor), 12.9 min (major), minor diastereomer:  $t_R$  = 11.0 min (major), 15.7 min (minor).

$[\alpha]_D^{25} = +110.38$  ( $c = 0.26$ ,  $\text{CHCl}_3$ ).

**Mp:** 145.0-145.5  $^\circ\text{C}$ .

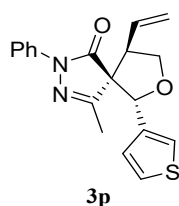

**(5R,6S,9R)-4-methyl-2-phenyl-6-(thiophen-3-yl)-9-vinyl-7-oxa-2,3-diazaspiro[4.4]non-3-en-1-one (3p)**

White solid, 25.3 mg, 75% yield, 3:1 *dr*, 95/75% *ee*.

**$^1\text{H}$  NMR** (400 MHz, Chloroform-*d*)  $\delta$  7.91 (d,  $J = 8.1$  Hz, 2H), 7.43 (t,  $J = 7.6$  Hz, 2H), 7.33 – 7.19 (m, 3H), 6.78 (d,  $J = 4.8$  Hz, 1H), 6.08 – 5.90 (m, 1H), 5.43 (s, 1H), 5.15 (dd,  $J = 14.0, 7.0$  Hz, 2H), 4.43 (t,  $J = 8.1$  Hz, 1H), 4.09 (t,  $J = 9.3$  Hz, 1H), 3.32 (q,  $J = 8.8$  Hz, 1H), 1.69 (s, 3H).

**$^{13}\text{C}$  NMR** (100 MHz, Chloroform-*d*)  $\delta$  172.4, 160.9, 137.9, 137.8, 131.8, 128.9, 126.8, 125.2, 124.3, 120.7, 119.9, 118.9, 85.0, 72.4, 68.1, 52.1, 14.6.

**IR:** 3080, 2855, 1698, 1592, 1489, 1366, 1325, 1270, 1068, 769, 733, 691  $\text{cm}^{-1}$ ;

**HRMS** (ESI)  $m/z$  calcd for  $\text{C}_{19}\text{H}_{18}\text{N}_2\text{NaO}_2\text{S}$   $[\text{M}+\text{Na}]^+$ : 361.0981, found: 361.0985.

**HPLC** (CHIRALPAK AD-H), *n*-hexane/isopropanol = 94/6, flow rate 1 mL/min, detection at 254 nm, major diastereomer:  $t_R$  = 7.7 min (minor), 13.1 min (major), minor diastereomer:  $t_R$  = 9.8 min (major), 15.2 min (minor).

$[\alpha]_D^{25} = +76.36$  ( $c = 0.38$ ,  $\text{CHCl}_3$ ).

**Mp:** 126.8-127.9  $^\circ\text{C}$ .

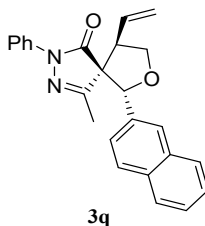

**(5R,6R,9R)-4-methyl-6-(naphthalen-2-yl)-2-phenyl-9-vinyl-7-oxa-2,3-diazaspiro[4.4]non-3-en-1-one (3q)**

White solid, 26.7 mg, 70% yield, 2.5:1 *dr*, 98/71% *ee*.

<sup>1</sup>H NMR (400 MHz, Chloroform-*d*)  $\delta$  7.93 (d, *J* = 8.0 Hz, 2H), 7.88 – 7.76 (m, 4H), 7.54 – 7.42 (m, 4H), 7.25 (t, *J* = 7.5 Hz, 1H), 7.17 (d, *J* = 8.5 Hz, 1H), 6.14 – 5.92 (m, 1H), 5.62 (s, 1H), 5.26 – 5.09 (m, 2H), 4.53 (t, *J* = 8.1 Hz, 1H), 4.21 (t, *J* = 9.4 Hz, 1H), 3.37 (q, *J* = 8.7 Hz, 1H), 1.55 (s, 3H).

<sup>13</sup>C NMR (100 MHz, Chloroform-*d*)  $\delta$  172.9, 160.7, 137.9, 134.4, 133.0, 133.0, 131.6, 128.9, 128.5, 128.1, 127.8, 126.5, 126.2, 125.3, 123.7, 122.5, 120.1, 119.0, 87.3, 72.4, 68.6, 52.4, 14.9.

IR: 3056, 2852, 1694, 1594, 1493, 1382, 1325, 756, 692 cm<sup>-1</sup>;

HRMS (ESI) *m/z* calcd for C<sub>25</sub>H<sub>22</sub>N<sub>2</sub>NaO<sub>2</sub> [M+Na]<sup>+</sup>: 405.1573, found: 405.1559.

HPLC (CHIRALPAK IC-H), *n*-hexane/isopropanol = 95/5, flow rate 1 mL/min, detection at 254 nm, major diastereomer: *t<sub>R</sub>* = 12.3 min (major), 16.9 min (minor), minor diastereomer: *t<sub>R</sub>* = 12.8 min (major), 16.7 min (minor).

$[\alpha]_{\text{D}}^{25} = + 213.41$  (*c* = 0.32, CHCl<sub>3</sub>).

Mp: 135.9-137.1 °C.

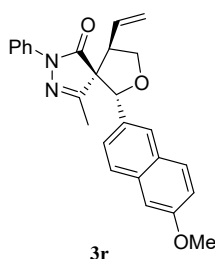

**(5R,6R,9R)-6-(6-methoxynaphthalen-2-yl)-4-methyl-2-phenyl-9-vinyl-7-oxa-2,3-diazaspiro[4.4]non-3-en-1-one (3r)**

White solid, 30.5 mg, 74% yield, 2.5:1 *dr*, 96/31% *ee*.

<sup>1</sup>H NMR (400 MHz, Chloroform-*d*)  $\delta$  7.97 – 7.89 (m, 2H), 7.78 (s, 1H), 7.69 (dd, *J* = 15.0, 8.8 Hz, 2H), 7.49 – 7.41 (m, 2H), 7.27 – 7.22 (m, 1H), 7.20 – 7.11 (m, 3H), 6.10 – 5.92 (m, 1H), 5.59 (s, 1H), 5.24 – 5.11 (m, 2H), 4.52 (dd, *J* = 8.6, 7.5 Hz, 1H), 4.21 (dd, *J* = 10.1, 8.8 Hz, 1H), 3.93 (s,

3H), 3.37 (dd,  $J = 17.0, 9.6$  Hz, 1H), 1.58 (d,  $J = 16.3$  Hz, 3H).

$^{13}\text{C}$  NMR (100 MHz, Chloroform- $d$ )  $\delta$  173.0, 160.8, 157.9, 137.9, 134.2, 132.1, 131.7, 129.6, 128.9, 128.5, 127.3, 125.2, 123.5, 123.1, 120.0, 119.3, 119.0, 105.7, 87.3, 72.4, 68.7, 55.3, 52.3, 14.9.

IR: 3055, 2857, 1688, 1596, 1488, 1369, 1268, 1175, 779, 690  $\text{cm}^{-1}$ ;

HRMS (ESI)  $m/z$  calcd for  $\text{C}_{26}\text{H}_{24}\text{N}_2\text{NaO}_3$   $[\text{M}+\text{Na}]^+$ : 435.1679, found: 435.1678.

HPLC (CHIRALPAK IC-H),  $n$ -hexane/isopropanol = 95/5, flow rate 1 mL/min, detection at 254 nm, major diastereomer:  $t_{\text{R}} = 12.3$  min (major), 16.9 min (minor), minor diastereomer:  $t_{\text{R}} = 14.3$  min (major), 22.4 min (minor).

$[\alpha]_{\text{D}}^{25} = +241.65$  ( $c = 0.38$ ,  $\text{CHCl}_3$ ).

Mp: 102.4-102.9  $^{\circ}\text{C}$ .

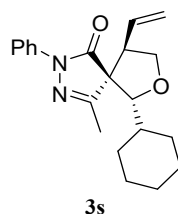

**(5R,6R,9R)-6-cyclohexyl-4-methyl-2-phenyl-9-vinyl-7-oxa-2,3-diazaspiro[4.4]non-3-en-1-one**  
**(3s)**

Colorless oil, 16.9 mg, 50% yield, 4:1  $dr$ , 90/74%  $ee$ .

$^1\text{H}$  NMR (400 MHz, Chloroform- $d$ )  $\delta$  7.86 (dd,  $J = 8.7, 1.1$  Hz, 2H), 7.45 – 7.35 (m, 2H), 7.23 – 7.15 (m, 1H), 6.05 – 5.88 (m, 1H), 5.15 – 4.99 (m, 2H), 4.24 (dd,  $J = 8.7, 7.8$  Hz, 1H), 3.89 (d,  $J = 10.5$  Hz, 1H), 3.72 (t,  $J = 9.2$  Hz, 1H), 3.11 (dd,  $J = 17.1, 9.3$  Hz, 1H), 2.27 (s, 3H), 2.09 (d,  $J = 13.2$  Hz, 1H), 1.79 – 1.72 (m, 1H), 1.68 – 1.56 (m, 4H), 1.30 – 0.94 (m, 2H), 0.93 – 0.76 (m, 1H).

$^{13}\text{C}$  NMR (100 MHz, Chloroform- $d$ )  $\delta$  172.4, 161.4, 138.0, 132.8, 128.9, 125.1, 119.3, 119.0, 91.7, 72.0, 66.1, 52.9, 39.5, 31.2, 27.8, 26.1, 25.6, 25.4, 15.6.

IR: 2926, 2852, 1708, 1597, 1500, 1370, 1122, 1062, 757, 651  $\text{cm}^{-1}$ ;

HRMS (ESI)  $m/z$  calcd for  $\text{C}_{21}\text{H}_{26}\text{N}_2\text{NaO}_2$   $[\text{M}+\text{Na}]^+$ : 361.1886, found: 361.1882.

HPLC (CHIRALPAK AD-H),  $n$ -hexane/isopropanol = 94/6, flow rate 1 mL/min, detection at 254 nm, major diastereomer:  $t_{\text{R}} = 5.5$  min (minor), 7.0 min (major), minor diastereomer:  $t_{\text{R}} = 6.6$  min (minor), 9.9 min (major).

$[\alpha]_{\text{D}}^{25} = -54.56$  ( $c = 0.20$ ,  $\text{CHCl}_3$ ).

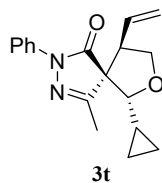

**(5R,6R,9R)-6-cyclopropyl-4-methyl-2-phenyl-9-vinyl-7-oxa-2,3-diazaspiro[4.4]non-3-en-1-one (3t)**

Colorless oil, 23.2 mg, 77% yield, 5.1:1 *dr*, 97% *ee*.

<sup>1</sup>H NMR (400 MHz, Chloroform-*d*)  $\delta$  7.96 – 7.82 (m, 2H), 7.42 (t, *J* = 8.0 Hz, 2H), 7.21 (t, *J* = 7.4 Hz, 1H), 6.15 – 5.88 (m, 1H), 5.21 – 5.01 (m, 2H), 4.30 (t, *J* = 8.2 Hz, 1H), 3.84 (t, *J* = 9.1 Hz, 1H), 3.47 (d, *J* = 9.4 Hz, 1H), 3.24 (q, *J* = 8.9 Hz, 1H), 2.31 (d, *J* = 1.5 Hz, 3H), 1.07 – 0.85 (m, 1H), 0.78 – 0.62 (m, 1H), 0.55 – 0.33 (m, 2H), 0.22 – 0.07 (m, 1H).

<sup>13</sup>C NMR (100 MHz, Chloroform-*d*)  $\delta$  172.4, 161.1, 137.9, 132.7, 128.9, 125.1, 119.1, 118.9, 92.4, 72.5, 67.3, 51.5, 15.7, 10.8, 4.5, 0.9. IR: 3081, 2861, 1706, 1596, 1500, 1368, 1126, 1072, 760, 692 cm<sup>-1</sup>;

HRMS (ESI) *m/z* calcd for C<sub>18</sub>H<sub>20</sub>N<sub>2</sub>NaO<sub>2</sub> [M+Na]<sup>+</sup>: 319.1418, found: 319.1417.

HPLC (CHIRALPAK AD-H), *n*-hexane/isopropanol = 94/6, flow rate 1 mL/min, detection at 254 nm, *t*<sub>R</sub> = 6.1 min (minor), 9.0 min (major).

[ $\alpha$ ]<sub>D</sub><sup>25</sup> = - 3.68 (*c* = 0.38, CHCl<sub>3</sub>).

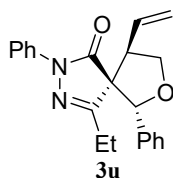

**(5R,6R,9R)-4-ethyl-2,6-diphenyl-9-vinyl-7-oxa-2,3-diazaspiro[4.4]non-3-en-1-one (3u)**

Colorless oil, 21.8 mg, 63% yield, 2.2:1 *dr*, 95/78% *ee*.

<sup>1</sup>H NMR (400 MHz, Chloroform-*d*)  $\delta$  7.97 – 7.91 (m, 2H), 7.47 – 7.40 (m, 2H), 7.36 – 7.27 (m, 3H), 7.25 – 7.17 (m, 3H), 6.07 – 5.91 (m, 1H), 5.43 (s, 1H), 5.26 – 5.07 (m, 2H), 4.44 (dd, *J* = 8.5, 7.5 Hz, 1H), 4.11 (dd, *J* = 10.2, 8.8 Hz, 1H), 3.30 (dd, *J* = 17.1, 9.6 Hz, 1H), 2.11 (dq, *J* = 17.3, 7.3 Hz, 1H), 1.62 (dq, *J* = 17.3, 7.4 Hz, 1H), 0.86 (t, *J* = 7.3 Hz, 3H).

<sup>13</sup>C NMR (100 MHz, Chloroform-*d*)  $\delta$  172.9, 164.7, 138.1, 137.0, 131.8, 128.9, 128.5, 128.0, 125.1, 124.6, 119.9, 119.0, 87.42, 72.4, 68.9, 52.2, 22.0, 9.4.

IR: 3064, 2978, 1705, 1597, 1499, 1351, 1067, 757, 726 cm<sup>-1</sup>;

**HRMS** (ESI)  $m/z$  calcd for  $C_{22}H_{22}N_2NaO_2$   $[M+Na]^+$ : 369.1573, found: 369.1565.

**HPLC** (CHIRALPAK AD-H), *n*-hexane/isopropanol = 94/6, flow rate 1 mL/min, detection at 254 nm, major diastereomer:  $t_R$  = 5.9 min (minor), 10.8 min (major), minor diastereomer:  $t_R$  = 7.2 min (major), 13.5 min (minor).

$[\alpha]_D^{25} = +89.64$  ( $c = 0.20$ ,  $CHCl_3$ ).

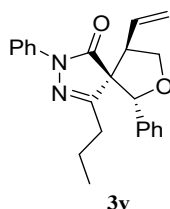

**(5R,6R,9R)-2,6-diphenyl-4-propyl-9-vinyl-7-oxa-2,3-diazaspiro[4.4]non-3-en-1-one (3v)**

Colorless oil, 20.5 mg, 57% yield, 2.3:1 *dr*, 95/75% *ee*.

**$^1H$  NMR** (400 MHz, Chloroform-*d*)  $\delta$  7.96 – 7.91 (m, 2H), 7.46 – 7.40 (m, 2H), 7.34 – 7.29 (m, 3H), 7.25 – 7.19 (m, 3H), 6.09 – 5.91 (m, 1H), 5.44 (s, 1H), 5.21 – 5.07 (m, 2H), 4.44 (dd,  $J = 8.5$ , 7.6 Hz, 1H), 4.11 (dd,  $J = 10.2$ , 8.8 Hz, 1H), 3.31 (dd,  $J = 17.1$ , 9.6 Hz, 1H), 2.13 – 1.97 (m, 1H), 1.59 – 1.44 (m, 2H), 1.28 – 1.06 (m, 1H), 0.75 (dd,  $J = 8.9$ , 5.5 Hz, 3H).

**$^{13}C$  NMR** (100 MHz, Chloroform-*d*)  $\delta$  172.8, 163.7, 138.1, 136.9, 131.8, 128.9, 128.5, 128.0, 125.1, 124.7, 119.9, 118.9, 87.5, 72.4, 68.8, 52.2, 30.5, 18.4, 13.7.

**IR**: 3064, 2962, 1706, 1597, 1500, 1359, 1068, 756, 692  $cm^{-1}$ ;

**HRMS** (ESI)  $m/z$  calcd for  $C_{23}H_{25}N_2NaO_2$   $[M+Na]^+$ : 383.1730, found: 383.1738.

**HPLC** (CHIRALPAK AD-H), *n*-hexane/isopropanol = 94/6, flow rate 1 mL/min, detection at 254 nm, major diastereomer:  $t_R$  = 5.6 min (minor), 8.4 min (major), minor diastereomer:  $t_R$  = 6.5 min (major), 10.8 min (minor).

$[\alpha]_D^{25} = +92.78$  ( $c = 0.26$ ,  $CHCl_3$ ).

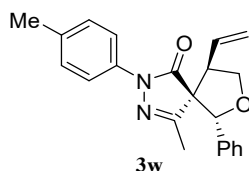

**(5R,6R,9R)-4-methyl-6-phenyl-2-(*p*-tolyl)-9-vinyl-7-oxa-2,3-diazaspiro[4.4]non-3-en-1-one (3w)**

White solid, 22.5 mg, 65% yield, 4:1 *dr*, 96/75% *ee*.

**<sup>1</sup>H NMR** (400 MHz, Chloroform-*d*)  $\delta$  7.79 – 7.74 (m, 2H), 7.34 – 7.29 (m, 3H), 7.25 – 7.19 (m, 4H), 6.07 – 5.90 (m, 1H), 5.44 (s, 1H), 5.20 – 5.10 (m, 2H), 4.45 (dd,  $J = 8.6, 7.5$  Hz, 1H), 4.13 (dd,  $J = 10.1, 8.8$  Hz, 1H), 3.30 (dd,  $J = 17.0, 9.6$  Hz, 1H), 2.38 (s, 3H), 1.57 (s, 3H).

**<sup>13</sup>C NMR** (100 MHz, Chloroform-*d*)  $\delta$  172.6, 160.5, 137.0, 135.4, 135.0, 131.7, 129.4, 128.6, 128.1, 124.7, 119.9, 119.0, 87.1, 72.3, 68.5, 52.2, 21.0, 14.7.

**IR:** 3022, 2855, 1694, 1508, 1367, 1330, 1064, 823, 751  $\text{cm}^{-1}$ ;

**HRMS** (ESI)  $m/z$  calcd for  $\text{C}_{22}\text{H}_{22}\text{N}_2\text{NaO}_2$   $[\text{M}+\text{Na}]^+$ : 369.1573, found: 369.1585.

**HPLC** (CHIRALPAK AD-H), *n*-hexane/isopropanol = 90/10, flow rate 1 mL/min, detection at 254 nm, major diastereomer:  $t_R = 6.5$  min (minor), 14.9 min (major), minor diastereomer:  $t_R = 7.7$  min (major), 20.1 min (minor).

$[\alpha]_D^{25} = +98.58$  ( $c = 0.28$ ,  $\text{CHCl}_3$ ).

**Mp:** 119.8-120.7 °C.

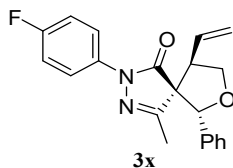

**(5R,6R,9R)-2-(4-fluorophenyl)-4-methyl-6-phenyl-9-vinyl-7-oxa-2,3-diazaspiro[4.4]non-3-en-1-one (3x)**

Colorless oil, 24.1 mg, 69% yield, 2:1 *dr*, 94/74% *ee*.

**<sup>1</sup>H NMR** (400 MHz, Chloroform-*d*)  $\delta$  7.92 – 7.83 (m, 2H), 7.37 – 7.29 (m, 3H), 7.26 – 7.21 (m, 2H), 7.14 – 7.04 (m, 2H), 6.10 – 5.87 (m, 1H), 5.44 (s, 1H), 5.24 – 5.08 (m, 2H), 4.46 (dd,  $J = 8.6, 7.5$  Hz, 1H), 4.14 (dd,  $J = 10.1, 8.8$  Hz, 1H), 3.31 (dd,  $J = 17.0, 9.6$  Hz, 1H), 1.58 (s, 3H).

**<sup>13</sup>C NMR** (100 MHz, Chloroform-*d*)  $\delta$  172.7, 160.9, 160.0(d,  $J = 244.7$  Hz), 136.9, 134.0(d,  $J = 2.8$  Hz), 131.6, 128.6, 128.2, 124.7, 120.7(d,  $J = 8.0$  Hz), 120.1, 115.6(d,  $J = 22.6$  Hz), 87.1, 72.3, 68.6, 52.2, 14.7.

**IR:** 3077, 2921, 2853, 1705, 1596, 1515, 1368, 1251, 1072, 762  $\text{cm}^{-1}$ ;

**HRMS** (ESI)  $m/z$  calcd for  $\text{C}_{21}\text{H}_{19}\text{FN}_2\text{NaO}_2$   $[\text{M}+\text{Na}]^+$ : 373.1323, found: 373.1319.

**HPLC** (CHIRALPAK AD-H), *n*-hexane/isopropanol = 94/6, flow rate 1 mL/min, detection at 254 nm, major diastereomer:  $t_R = 7.4$  min (minor), 10.4 min (major), minor diastereomer:  $t_R = 9.3$  min (major), 14.3 min (minor).

$[\alpha]_D^{25} = +133.82$  ( $c = 0.22$ ,  $\text{CHCl}_3$ ).

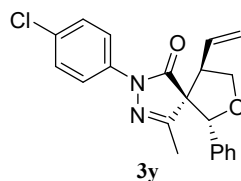

**(5R,6R,9R)-2-(4-chlorophenyl)-4-methyl-6-phenyl-9-vinyl-7-oxa-2,3-diazaspiro[4.4]non-3-en-1-one (3y)**

White solid, 22.3 mg, 62% yield, 2:1 *dr*, 85/75% *ee*.

$^1\text{H NMR}$  (400 MHz, Chloroform-*d*)  $\delta$  7.89 (d,  $J = 7.9$  Hz, 2H), 7.38 (d,  $J = 7.9$  Hz, 2H), 7.31 (d,  $J = 7.3$  Hz, 3H), 7.21 (d,  $J = 7.0$  Hz, 2H), 6.09 – 5.85 (m, 1H), 5.43 (s, 1H), 5.16 (dd,  $J = 13.6, 8.6$  Hz, 2H), 4.46 (t,  $J = 8.0$  Hz, 1H), 4.13 (t,  $J = 9.4$  Hz, 1H), 3.31 (q,  $J = 8.8$  Hz, 1H), 1.58 (s, 3H).

$^{13}\text{C NMR}$  (100 MHz, Chloroform-*d*)  $\delta$  172.8, 161.0, 136.8, 136.4, 131.5, 130.2, 128.9, 128.6, 128.2, 124.6, 120.1, 119.9, 87.1, 72.3, 68.7, 52.2, 14.7.

**IR:** 3021, 2856, 1698, 1488, 1328, 1065, 833, 726  $\text{cm}^{-1}$ ;

**HRMS** (ESI)  $m/z$  calcd for  $\text{C}_{21}\text{H}_{19}\text{ClN}_2\text{NaO}_2$   $[\text{M}+\text{Na}]^+$ : 389.1027, found: 389.1031.

**HPLC** (CHIRALPAK AD-H), *n*-hexane/isopropanol = 85/15, flow rate 1 mL/min, detection at 254 nm, major diastereomer:  $t_R = 5.2$  min (minor), 8.8 min (major), minor diastereomer:  $t_R = 6.6$  min (major), 12.8 min (minor).

$[\alpha]_D^{25} = +101.16$  ( $c = 0.26$ ,  $\text{CHCl}_3$ ).

**Mp:** 98.8-100.6 °C.

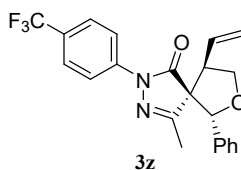

**(5R,6R,9R)-4-methyl-6-phenyl-2-(4-(trifluoromethyl)phenyl)-9-vinyl-7-oxa-2,3-diazaspiro[4.4]non-3-en-1-one (3z)**

Colorless oil, 24.4 mg, 61% yield, 2.9:1 *dr*, 93/72% *ee*.

$^1\text{H NMR}$  (400 MHz, Chloroform-*d*)  $\delta$  8.09 (d,  $J = 8.5$  Hz, 2H), 7.68 (d,  $J = 8.6$  Hz, 2H), 7.36 – 7.29 (m, 3H), 7.24 – 7.18 (m, 2H), 6.02 – 5.87 (m, 1H), 5.44 (s, 1H), 5.23 – 5.08 (m, 2H), 4.47 (dd,  $J = 8.7, 7.5$  Hz, 1H), 4.14 (dd,  $J = 10.1, 8.9$  Hz, 1H), 3.32 (dd,  $J = 17.0, 9.6$  Hz, 1H), 1.60 (s, 3H).



$^{13}\text{C}$  NMR (100 MHz, Chloroform-*d*)  $\delta$  173.2, 161.4, 140.2, 136.7, 131.4, 128.6, 128.3, 126.7 (q,  $J = 32.8$  Hz), 126.1 (q,  $J = 3.8$  Hz), 124.6, 124.1 (q,  $J = 271.7$  Hz), 120.27, 118.22, 87.19, 72.31, 68.87, 52.33, 14.76.

**IR:** 3065, 2863, 1713, 1614, 1520, 1325, 1165, 1125, 1068, 843, 718  $\text{cm}^{-1}$ ;

**HRMS** (ESI)  $m/z$  calcd for  $\text{C}_{22}\text{H}_{19}\text{F}_3\text{N}_2\text{NaO}_2$   $[\text{M}+\text{Na}]^+$ : 423.1291, found: 423.1299.

**HPLC** (CHIRALPAK AD-H), *n*-hexane/isopropanol = 85/15, flow rate 1 mL/min, detection at 254 nm, major diastereomer:  $t_R = 4.3$  min (minor), 7.0 min (major), minor diastereomer:  $t_R = 5.1$  min (major), 8.6 min (minor).

$[\alpha]_{\text{D}}^{25} = 106.84$  ( $c = 0.26$ ,  $\text{CHCl}_3$ ).

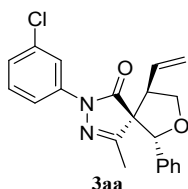

**(5*R*,6*R*,9*R*)-2-(3-chlorophenyl)-4-methyl-6-phenyl-9-vinyl-7-oxa-2,3-diazaspiro[4.4]non-3-en-1-one (3aa)**

Colorless oil, 20.1 mg, 55% yield, 3:1 *dr*, 91/77% *ee*.

$^1\text{H}$  NMR (400 MHz, Chloroform-*d*)  $\delta$  7.98 (t,  $J = 2.0$  Hz, 1H), 7.88 (ddd,  $J = 8.3, 2.0, 0.9$  Hz, 1H), 7.38 – 7.30 (m, 4H), 7.26 – 7.16 (m, 3H), 6.08 – 5.83 (m, 1H), 5.44 (s, 1H), 5.28 – 5.01 (m, 2H), 4.47 (dd,  $J = 8.7, 7.5$  Hz, 1H), 4.13 (dd,  $J = 10.1, 8.8$  Hz, 1H), 3.53 – 3.16 (m, 1H), 1.58 (s, 3H).

$^{13}\text{C}$  NMR (100 MHz, Chloroform-*d*)  $\delta$  172.9, 161.1, 138.8, 136.8, 134.7, 131.4, 130.0, 128.6, 128.2, 125.1, 124.6, 120.2, 118.7, 116.5, 87.1, 72.3, 68.8, 52.3, 14.7.

**IR:** 3076, 2863, 1709, 1593, 1483, 1366, 1088, 780, 715  $\text{cm}^{-1}$ ;

**HRMS** (ESI)  $m/z$  calcd for  $\text{C}_{22}\text{H}_{19}\text{ClN}_2\text{NaO}_2$   $[\text{M}+\text{Na}]^+$ : 389.1027, found: 389.1031.

**HPLC** (CHIRALPAK AD-H), *n*-hexane/isopropanol = 94/6, flow rate 1 mL/min, detection at 254 nm, major diastereomer:  $t_R = 5.0$  min (minor), 5.8 min (major), minor diastereomer:  $t_R = 6.5$  min (major), 7.0 min (minor).

$[\alpha]_{\text{D}}^{25} = + 53.49$  ( $c = 0.34$ ,  $\text{CHCl}_3$ ).

## 7. Synthetic transforms of the enantioenriched **3a**

To a stirred solution of Hoveyda-Grubbs 2<sup>nd</sup> generation catalyst (0.009 mmol, 5.6 mg, 6 mol%) in toluene (1.0 mL) under an N<sub>2</sub> atmosphere, optically active substrate **3a** (49.8 mg, 0.15 mmol, 1.0 equiv., 98% ee) in toluene (2.0 mL) and ethyl acrylate (164 μL, 1.5 mmol, 10 equiv.) were added in this order. Then the reaction mixture was heated at 90 °C. After being stirred at the same temperature for 2 h, the reaction mixture was cooled down to room temperature and concentrated under reduced pressure. The residue was purified by silica gel column chromatography with Petroleum / EtOAc (85:15) to afford (**4a**) (49.6 mg, 82%) as a colorless oil.<sup>3</sup>

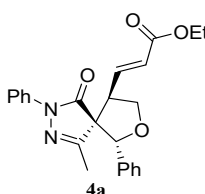

**Ethyl (E)-3-((5R,6R,9R)-1-methyl-4-oxo-3,6-diphenyl-7-oxa-2,3-diazaspiro[4.4]non-1-en-9-yl)acrylate (**4a**)**

Colorless oil, 49.6 mg, 82% yield, 20:1 *dr*, 97% *ee*.

<sup>1</sup>H NMR (400 MHz, Chloroform-*d*) δ 7.91 – 7.83 (m, 2H), 7.46 – 7.39 (m, 2H), 7.36 – 7.29 (m, 3H), 7.26 – 7.19 (m, 3H), 7.07 (dd, *J* = 15.6, 9.3 Hz, 1H), 5.87 (dd, *J* = 15.6, 0.8 Hz, 1H), 5.47 (s, 1H), 4.51 (dd, *J* = 8.7, 7.5 Hz, 1H), 4.29 – 4.10 (m, 3H), 3.42 (td, *J* = 9.1, 7.6 Hz, 1H), 1.61 (s, 3H), 1.26 (t, *J* = 7.1 Hz, 3H).

<sup>13</sup>C NMR (100 MHz, Chloroform-*d*) δ 172.0, 165.1, 160.1, 140.8, 137.6, 136.3, 128.9, 128.6, 128.3, 125.6, 125.4, 124.6, 119.2, 87.6, 71.9, 68.2, 60.7, 49.7, 14.8, 14.2.

IR: 2981, 2868, 1709, 1596, 1500, 1369, 1254, 1183, 1069, 985, 758, 720 cm<sup>-1</sup>;

HRMS (ESI) *m/z* calcd for C<sub>24</sub>H<sub>24</sub>N<sub>2</sub>NaO<sub>4</sub> [M+Na]<sup>+</sup>: 427.1628, found: 427.1620.

HPLC (CHIRALPAK AD-H), *n*-hexane/isopropanol = 92/8, flow rate 1 mL/min, detection at 254 nm, *t<sub>R</sub>* = 14.0 min (major), 16.1 min (minor).

[α]<sub>D</sub><sup>25</sup> = + 147.72 (*c* = 0.92, CHCl<sub>3</sub>).

To a stirred solution of optically active substrate **3a** (66.4 mg, 0.2 mmol, 1.0 equiv., 98% ee) in THF (2 mL) and H<sub>2</sub>O (2 mL), PdCl<sub>2</sub> (7.1 mg, 0.04 mmol, 0.2 equiv.), CuCl (39.6 mg, 0.4 mmol, 2.0

equiv.) were added at room temperature under an O<sub>2</sub> atmosphere. After being stirred at room temperature for 24 h under an O<sub>2</sub> atmosphere, the reaction mixture was diluted with EtOAc and poured into water. The aqueous layer was extracted with EtOAc. The combined organic layer was washed with brine, dried over Na<sub>2</sub>SO<sub>4</sub>, and concentrated under reduced pressure. The residue was purified by silica gel column chromatography with Petroleum / EtOAc (80 : 20) to afford (**5a**) (35.3 mg, 51%) as a colorless oil.<sup>3</sup>

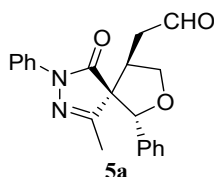

**2-((5R,6R,9R)-1-methyl-4-oxo-3,6-diphenyl-7-oxa-2,3-diazaspiro[4.4]non-1-en-9-yl)acetaldehyde (**5a**)**

Colorless oil, 35.3 mg, 51% yield, 20:1 *dr*, 97% *ee*.

**<sup>1</sup>H NMR** (400 MHz, Chloroform-*d*)  $\delta$  9.73 (s, 1H), 7.97 – 7.67 (m, 2H), 7.47 – 7.37 (m, 2H), 7.30 (dd, *J* = 4.9, 1.9 Hz, 2H), 7.28 – 7.26 (m, 1H), 7.25 – 7.19 (m, 3H), 5.20 (s, 1H), 4.65 (dd, *J* = 8.7, 7.6 Hz, 1H), 3.81 (t, *J* = 8.9 Hz, 1H), 3.36 – 3.08 (m, 2H), 2.87 (dd, *J* = 18.7, 5.6 Hz, 1H), 1.82 (s, 3H).

**<sup>13</sup>C NMR** (100 MHz, Chloroform-*d*)  $\delta$  199.6, 172.6, 161.8, 137.7, 135.7, 128.9, 128.5, 128.3, 125.5, 124.4, 119.4, 88.0, 73.1, 66.3, 42.8, 39.7, 15.0.

**IR**: 3064, 2857, 2729, 1720, 1702, 1670, 1596, 1500, 1369, 1095, 761, 718 cm<sup>-1</sup>;

**HRMS** (ESI) *m/z* calcd for C<sub>21</sub>H<sub>20</sub>N<sub>2</sub>NaO<sub>3</sub> [M+Na]<sup>+</sup>: 371.1366, found: 371.1365.

**HPLC** (CHIRALPAK AD-H), *n*-hexane/isopropanol = 98/2, flow rate 1 mL/min, detection at 254 nm, *t<sub>R</sub>* = 8.7 min (minor), 14.0 min (major).

**$[\alpha]_D^{25}$**  = + 218.64 (*c* = 0.40, CHCl<sub>3</sub>).

To a mixture of optically active substrate **3a** (66.4 mg, 0.2 mmol, 1.0 equiv., 98% *ee*), iodobenzene (81.6 mg, 0.4 mmol, 2 equiv.), K<sub>2</sub>CO<sub>3</sub> (55.2 mg, 0.4 mmol, 2 equiv.), Pd(OAc)<sub>2</sub> (4.6 mg, 0.02 mmol, 0.1 equiv.) in a sealed vial, DMF (3.0 mL) was added at room temperature under an argon atmosphere. After being stirred at 100 °C for 12 h, the reaction mixture was passed through a pad of celite, and concentrated under reduced pressure. The residue was purified by silica gel column

chromatography with Petroleum / EtOAc (95 : 5) to afford (**6a**) (64.1 mg, 81% ) as a white solid.<sup>3</sup>

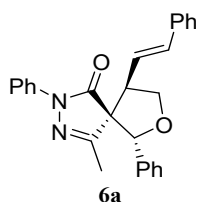

**(5R,6R,9R)-4-methyl-2,6-diphenyl-9-((E)-styryl)-7-oxa-2,3-diazaspiro[4.4]non-3-en-1-one**  
**(6a)**

White solid, 64.1 mg, 81% yield, 20:1 *dr*, 97% *ee*.

<sup>1</sup>H NMR (400 MHz, Chloroform-*d*)  $\delta$  7.97 – 7.76 (m, 2H), 7.43 – 7.37 (m, 2H), 7.32 (dd, *J* = 9.7, 4.4 Hz, 5H), 7.30 (d, *J* = 4.0 Hz, 2H), 7.28 – 7.23 (m, 3H), 7.22 – 7.17 (m, 1H), 6.54 – 6.33 (m, 2H), 5.51 (s, 1H), 4.52 (dd, *J* = 8.6, 7.6 Hz, 1H), 4.21 (dd, *J* = 10.0, 8.9 Hz, 1H), 3.50 (ddd, *J* = 10.0, 8.8, 7.5 Hz, 1H), 1.65 (s, 3H).

<sup>13</sup>C NMR (100 MHz, Chloroform-*d*)  $\delta$  172.8, 160.8, 137.8, 136.9, 136.2, 134.7, 128.9, 128.6, 128.6, 128.2, 128.0, 126.6, 125.3, 124.7, 122.9, 119.1, 87.4, 72.7, 68.8, 51.7, 14.8.

IR: 3028, 2863, 1704, 1596, 1499, 1368, 1068, 971, 756, 692 cm<sup>-1</sup>;

HRMS (ESI) *m/z* calcd for C<sub>27</sub>H<sub>24</sub>N<sub>2</sub>NaO<sub>2</sub> [M+Na]<sup>+</sup>: 431.1730, found: 431.1731.

HPLC (CHIRALPAK AD-H), *n*-hexane/isopropanol = 90/10, flow rate 1 mL/min, detection at 254 nm, *t*<sub>R</sub> = 8.5 min (minor), 10.0 min (major).

$[\alpha]_D^{25} = +250.85$  (*c* = 0.82, CHCl<sub>3</sub>).

Mp: 88.5-89.4 °C.

A solution of **3a** (49.8 mg, 0.15 mmol, 1.0 equiv., 98% *ee*) in dry THF (2 mL) at room temperature was added dropwise 9-BBN (0.5 M in THF, 4.5 mL, 15 equiv.). The mixture was stirred at 25 °C for 2 h, and this mixture was added dropwise water (0.5 mL), aq NaOH (3 M, 2 mL), then 30% aq H<sub>2</sub>O<sub>2</sub> (2 mL). After being stirred at 40 °C for 2 h, the mixture was extracted with ether (3×20 mL). The organic layer was combined and dried (Na<sub>2</sub>SO<sub>4</sub>). After removal of the solvents under reduced pressure, The residue was purified by silica gel column chromatography with Petroleum / EtOAc (50:50) to afford (**7a**) (26.3 mg, 49%) as a colorless oil.<sup>4</sup>

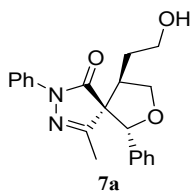

**(5R,6R,9R)-9-(2-hydroxyethyl)-4-methyl-2,6-diphenyl-7-oxa-2,3-diazaspiro[4.4]non-3-en-1-one (7a)**

Colorless oil, 26.7 mg, 49% yield, 20:1 *dr*, 98% *ee*.

**<sup>1</sup>H NMR** (400 MHz, Chloroform-*d*)  $\delta$  7.94 – 7.88 (m, 2H), 7.48 – 7.41 (m, 2H), 7.33 – 7.28 (m, 3H), 7.26 – 7.19 (m, 3H), 5.33 (s, 1H), 4.62 – 4.47 (m, 1H), 3.95 (dd, *J* = 10.3, 8.7 Hz, 1H), 3.58 (m, 2H), 2.97 (dq, *J* = 10.3, 7.3 Hz, 1H), 1.91 (ddd, *J* = 13.3, 6.6, 2.8 Hz, 2H), 1.64 (s, 3H), 1.40 (s, 1H).

**<sup>13</sup>C NMR** (100 MHz, Chloroform-*d*)  $\delta$  173.4, 162.3, 137.9, 136.7, 128.9, 128.5, 128.1, 125.3, 124.6, 119.0, 87.9, 73.5, 67.3, 60.9, 44.339, 30.0, 14.8.

**IR:** 3413, 2923, 2869, 1709, 1596, 1500, 1368, 1066, 758, 715 cm<sup>-1</sup>;

**HRMS** (ESI) *m/z* calcd for C<sub>21</sub>H<sub>22</sub>N<sub>2</sub>NaO<sub>3</sub> [M+Na]<sup>+</sup>: 373.1523, found: 373.1518.

**HPLC** (CHIRALPAK AD-H), *n*-hexane/isopropanol = 85/15, flow rate 1 mL/min, detection at 254 nm, *t<sub>R</sub>* = 7.2 min (minor), 8.0 min (major).

**$[\alpha]_D^{25}$**  = + 173.54 (*c* = 0.52, CHCl<sub>3</sub>).

## 8. Crystal data for enantiopure products 3a

**Preparations:** Compound **3a** (20.0 mg) was dissolved in *n*-hexane (3 mL) in a vial.

The vial was properly sealed with parafilm and kept at 20°C to allow the slow evaporation of the solvent until a single crystal was obtained. The crystals were subjected for single crystal XRD to determine the absolute configuration of **3a**.

**Methods:** The data set was collected by a Bruker D8 VENTURE with MetalJet source at 173 K equipped with micro-focus Ga radiation source ( $K\alpha = 1.34138 \text{ \AA}$ ). Applied with face-indexed numerical absorption correction, the structure solution and refinement were processed by SHELXTL program package.

**Date of 3a:** CCDC 2301125 contains the supplementary crystallographic data, and can be obtained via <https://www.ccdc.cam.ac.uk/>

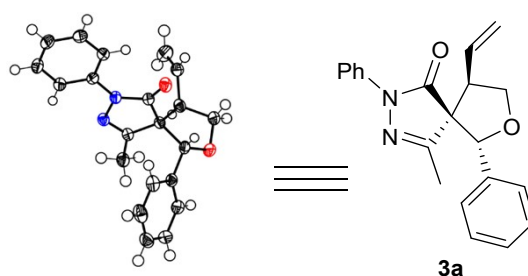

**Figure S4.** Single crystal structure **3a** (ellipsoid contour probability 50%).

**Table 1.** Crystal data and structure refinement for **3a**.

|                      |                                                                                                                                           |
|----------------------|-------------------------------------------------------------------------------------------------------------------------------------------|
| Identification code  | <b>3a</b>                                                                                                                                 |
| Empirical formula    | $C_{21}H_{20}N_2O_2$                                                                                                                      |
| Formula weight       | 332.39                                                                                                                                    |
| Temperature          | 173(2) K                                                                                                                                  |
| Wavelength           | 1.34139 Å                                                                                                                                 |
| Crystal system       | Orthorhombic                                                                                                                              |
| Space group          | $P2_12_12_1$                                                                                                                              |
| Unit cell dimensions | $a = 7.7270(4) \text{ \AA}$ $a = 90^\circ$<br>$b = 11.6009(6) \text{ \AA}$ $b = 90^\circ$<br>$c = 19.1442(10) \text{ \AA}$ $g = 90^\circ$ |
| Volume               | $1716.09(15) \text{ \AA}^3$                                                                                                               |
| Z                    | 4                                                                                                                                         |
| Density (calculated) | $1.287 \text{ Mg/m}^3$                                                                                                                    |

|                                   |                                                   |
|-----------------------------------|---------------------------------------------------|
| Absorption coefficient            | 0.424 mm <sup>-1</sup>                            |
| F(000)                            | 704                                               |
| Crystal size                      | 0.310 x 0.240 x 0.070 mm <sup>3</sup>             |
| Theta range for data collection   | 3.876 to 57.106°.                                 |
| Index ranges                      | -9<=h<=9, -14<=k<=14, -23<=l<=23                  |
| Reflections collected             | 32396                                             |
| Independent reflections           | 3507 [R(int) = 0.0473]                            |
| Completeness to theta = 53.594°   | 99.6 %                                            |
| Absorption correction             | Semi-empirical from equivalents                   |
| Max. and min. transmission        | 0.751 and 0.592                                   |
| Refinement method                 | Full-matrix least-squares on F <sup>2</sup>       |
| Data / restraints / parameters    | 3507 / 0 / 228                                    |
| Goodness-of-fit on F <sup>2</sup> | 1.054                                             |
| Final R indices [I>2sigma(I)]     | R <sub>1</sub> = 0.0284, wR <sub>2</sub> = 0.0748 |
| R indices (all data)              | R <sub>1</sub> = 0.0292, wR <sub>2</sub> = 0.0756 |
| Absolute structure parameter      | 0.00(7)                                           |
| Extinction coefficient            | 0.0087(13)                                        |
| Largest diff. peak and hole       | 0.186 and -0.151 e.Å <sup>-3</sup>                |

**Table 2.** Atomic coordinates (x 10<sup>4</sup>) and equivalent isotropic displacement parameters (Å<sup>2</sup> x 10<sup>3</sup>). for **3a** U(eq) is defined as one third of the trace of the orthogonalized U<sup>ij</sup> tensor.

|      | x        | y       | z       | U(eq) |
|------|----------|---------|---------|-------|
| O(1) | 8478(1)  | 2126(1) | 8351(1) | 32(1) |
| O(2) | 9762(2)  | 3513(1) | 6523(1) | 36(1) |
| N(1) | 5566(2)  | 2526(1) | 8164(1) | 24(1) |
| N(2) | 4554(2)  | 3025(1) | 7627(1) | 25(1) |
| C(1) | 7302(2)  | 2560(1) | 8017(1) | 23(1) |
| C(2) | 5590(2)  | 3398(1) | 7153(1) | 24(1) |
| C(3) | 7465(2)  | 3242(1) | 7340(1) | 23(1) |
| C(4) | 8369(2)  | 4449(1) | 7451(1) | 27(1) |
| C(5) | 10118(2) | 4272(2) | 7092(1) | 36(1) |
| C(6) | 8708(2)  | 2625(1) | 6813(1) | 27(1) |
| C(7) | 4689(2)  | 2037(1) | 8744(1) | 23(1) |

|       |         |         |         |       |
|-------|---------|---------|---------|-------|
| C(8)  | 2885(2) | 1966(1) | 8730(1) | 27(1) |
| C(9)  | 2017(2) | 1482(2) | 9291(1) | 33(1) |
| C(10) | 2922(2) | 1065(2) | 9863(1) | 36(1) |
| C(11) | 4706(2) | 1142(2) | 9873(1) | 35(1) |
| C(12) | 5610(2) | 1630(1) | 9320(1) | 29(1) |
| C(13) | 4915(2) | 3956(2) | 6510(1) | 33(1) |
| C(14) | 8502(2) | 4852(1) | 8194(1) | 30(1) |
| C(15) | 7757(3) | 5796(2) | 8430(1) | 44(1) |
| C(16) | 7868(2) | 1928(1) | 6244(1) | 26(1) |
| C(17) | 7129(2) | 873(1)  | 6407(1) | 35(1) |
| C(18) | 6331(3) | 216(2)  | 5891(1) | 44(1) |
| C(19) | 6281(2) | 611(2)  | 5211(1) | 44(1) |
| C(20) | 7020(2) | 1660(2) | 5044(1) | 41(1) |
| C(21) | 7808(2) | 2317(2) | 5559(1) | 34(1) |

---



## 9. Reference

- (1) H. Fakhraian, Y. Nafari, *J. Chem. Sci.* **2021**, 133, 40, 2-11.
- (2) S. Meninno, A. Roselli, A. Capobianco, J. Overgaard, A. Lattanzi, *Org. Lett.* **2017**, 19, 5030-5033
- (3) T. Morita, H. Murakami, Y. Asawa, H. Nakamura, *Angew. Chem. Int. Ed.* **2021**, e202113558 (1 of 5).
- (4) X.B. Huang, X.J. Li, T.T. Li, B. Chen, W.D. Chu, L. He, Q.Z. Liu, *Org. Lett.* **2019**, 21, 1713-1716.

## 10. The NMR spectra and HPLC chromatograms of compounds

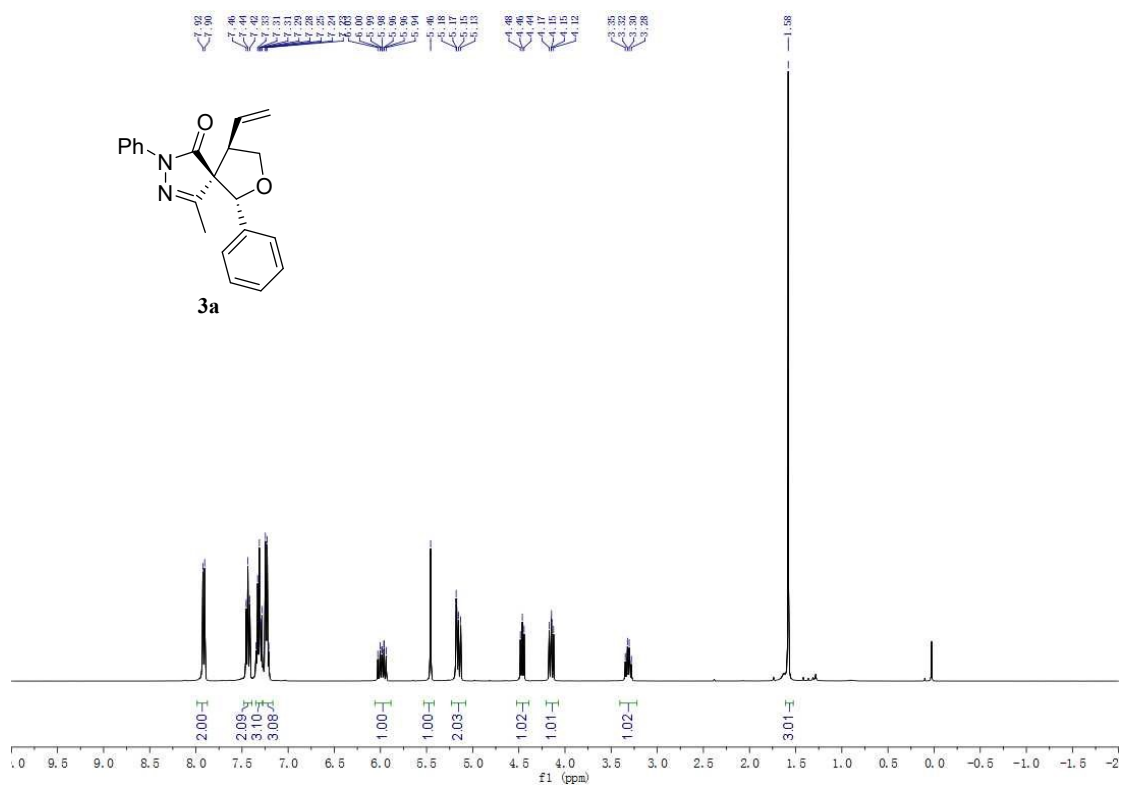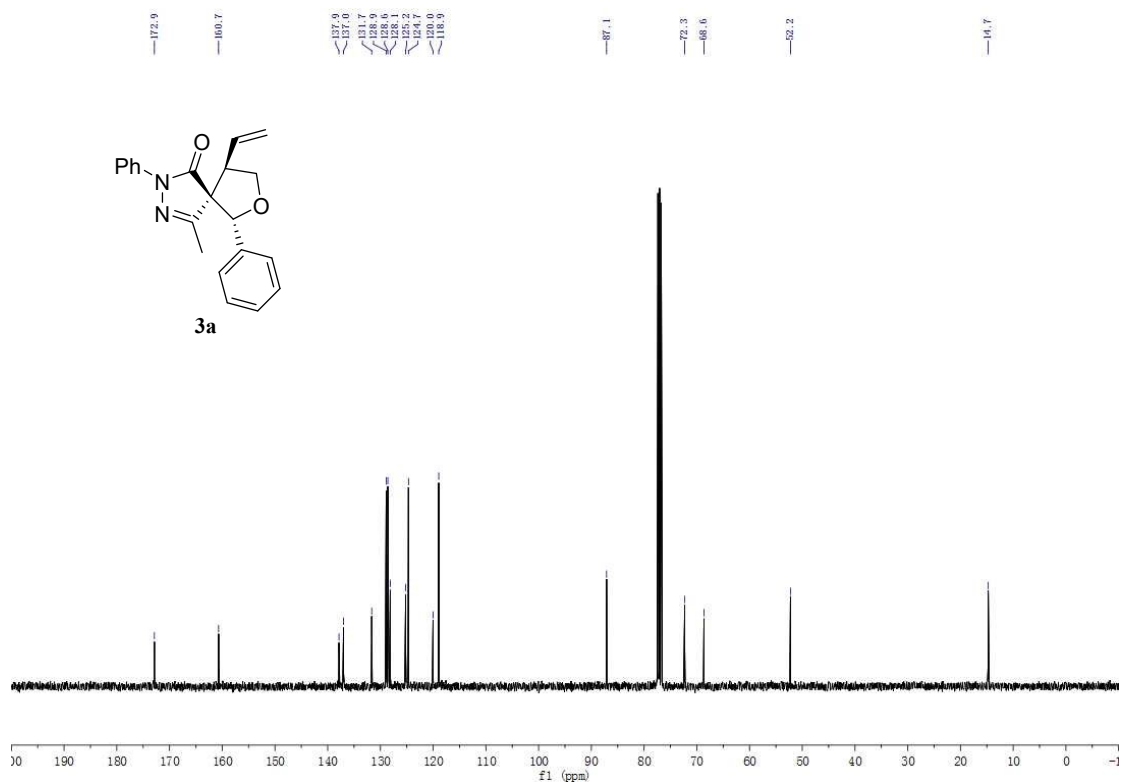

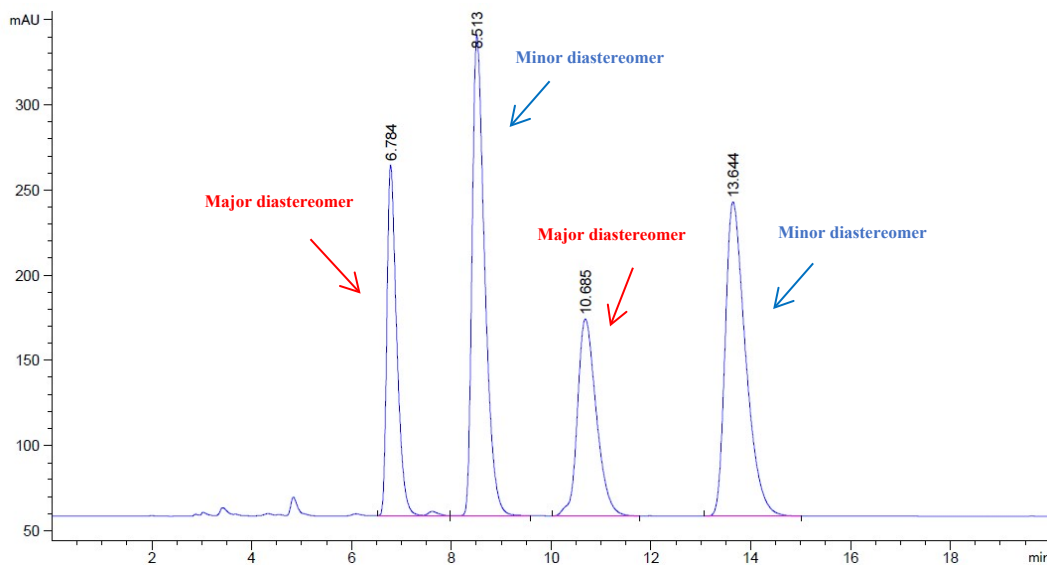

| Peak # | RetTime [min] | Type | Width [min] | Area [mAU*s] | Height [mAU] | Area %  |
|--------|---------------|------|-------------|--------------|--------------|---------|
| 1      | 6.784         | BV R | 0.2054      | 2844.04980   | 205.78218    | 17.7197 |
| 2      | 8.513         | BB   | 0.2661      | 4953.42578   | 281.72397    | 30.8621 |
| 3      | 10.685        | BB   | 0.4006      | 3027.42920   | 115.56310    | 18.8623 |
| 4      | 13.644        | BB   | 0.4286      | 5225.27051   | 184.41006    | 32.5558 |

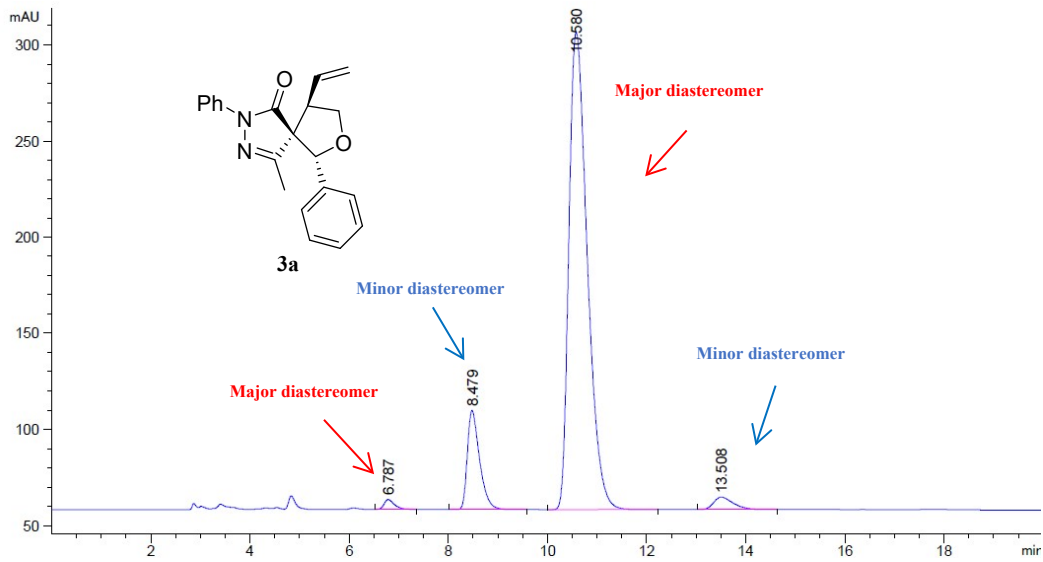

| Peak # | RetTime [min] | Type | Width [min] | Area [mAU*s] | Height [mAU] | Area %  |
|--------|---------------|------|-------------|--------------|--------------|---------|
| 1      | 6.787         | BB   | 0.2155      | 72.13745     | 5.05490      | 0.9604  |
| 2      | 8.479         | BB   | 0.2569      | 877.63507    | 51.48354     | 11.6840 |
| 3      | 10.580        | BB   | 0.3971      | 6383.95410   | 248.21346    | 84.9902 |
| 4      | 13.508        | BB   | 0.4094      | 177.67122    | 6.48986      | 2.3654  |

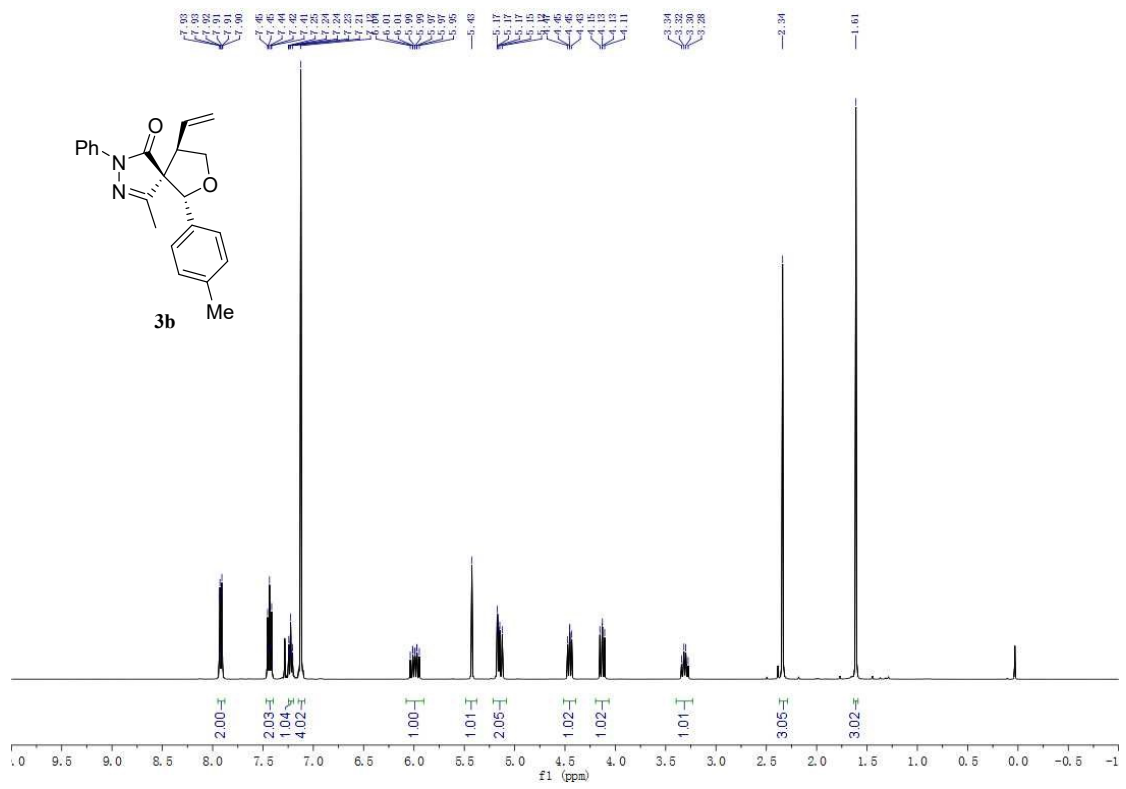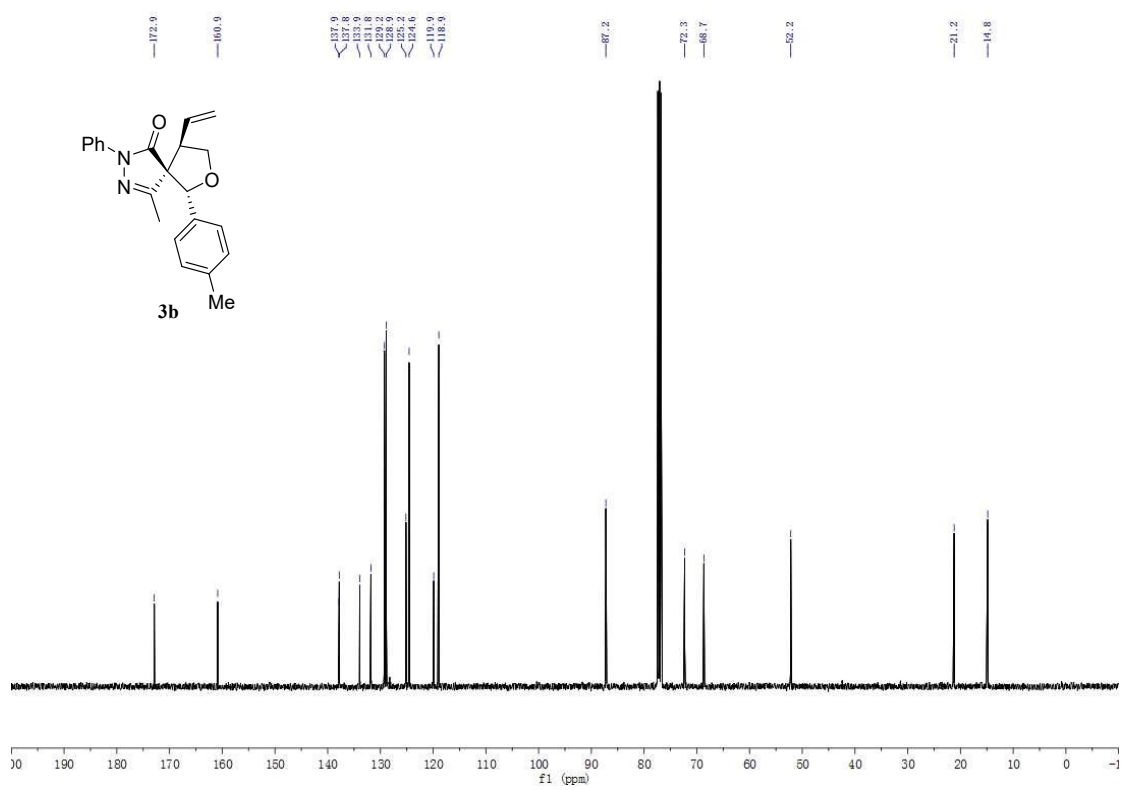

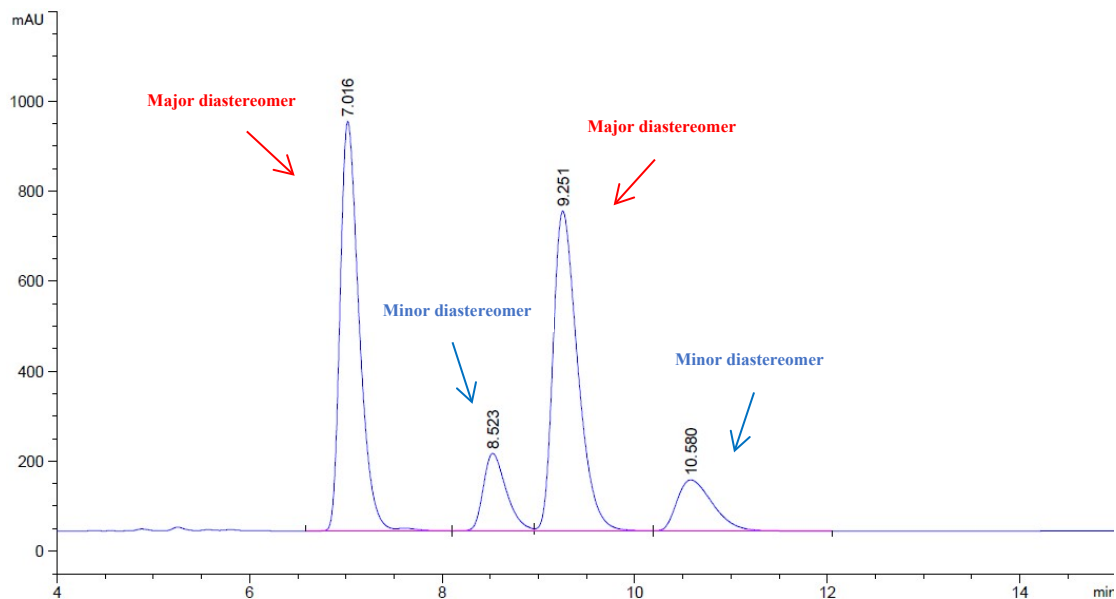

| Peak # | RetTime [min] | Type | Width [min] | Area [mAU*s] | Height [mAU] | Area %  |
|--------|---------------|------|-------------|--------------|--------------|---------|
| 1      | 7.016         | BV R | 0.2099      | 1.25577e4    | 910.45563    | 40.5590 |
| 2      | 8.523         | BV   | 0.2530      | 2852.03906   | 172.37343    | 9.2115  |
| 3      | 9.251         | VV   | 0.2722      | 1.26334e4    | 711.49420    | 40.8035 |
| 4      | 10.580        | VB   | 0.4030      | 2918.43774   | 113.48211    | 9.4260  |

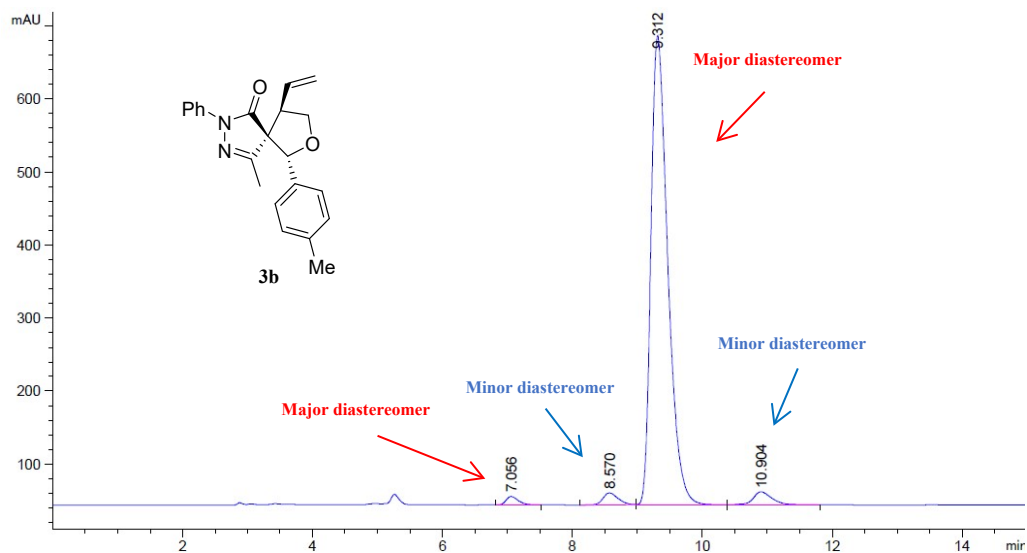

| Peak # | RetTime [min] | Type | Width [min] | Area [mAU*s] | Height [mAU] | Area %  |
|--------|---------------|------|-------------|--------------|--------------|---------|
| 1      | 7.056         | BB   | 0.1997      | 151.15945    | 11.54569     | 1.2271  |
| 2      | 8.570         | BV   | 0.2521      | 274.53577    | 16.50154     | 2.2287  |
| 3      | 9.312         | VB   | 0.2745      | 1.15288e4    | 642.08301    | 93.5902 |
| 4      | 10.904        | BB   | 0.3030      | 363.88870    | 17.91195     | 2.9540  |

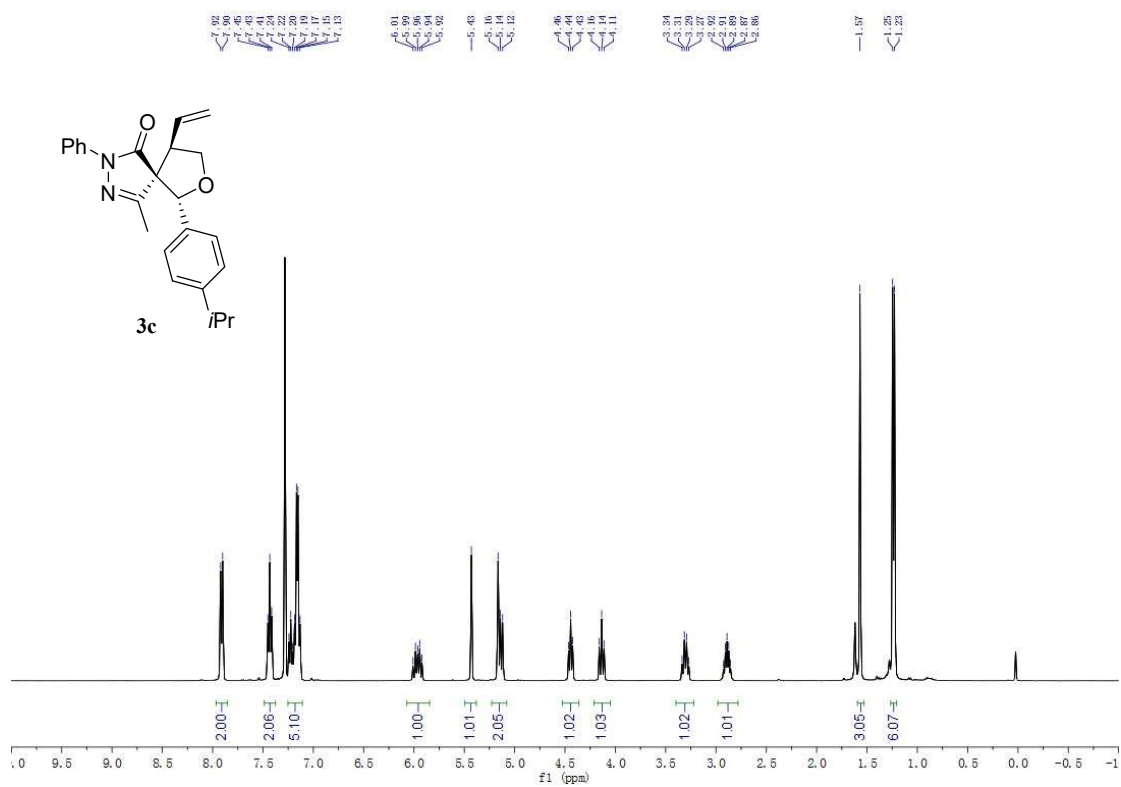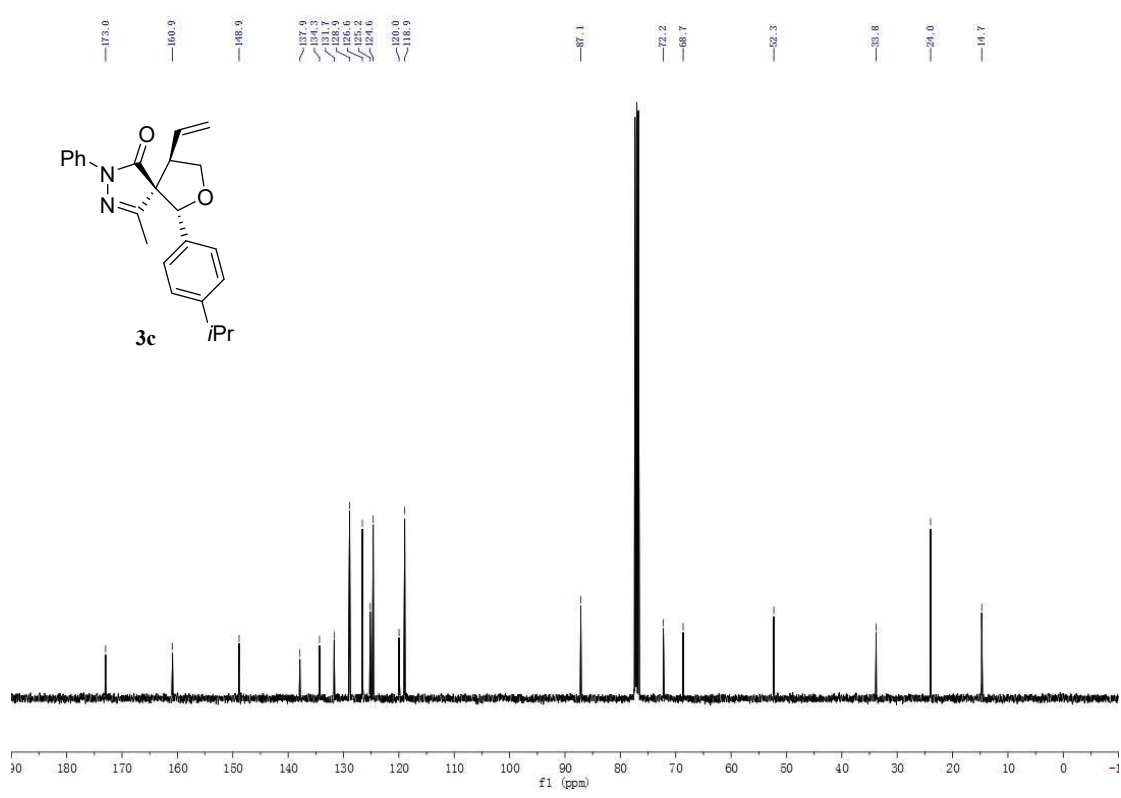

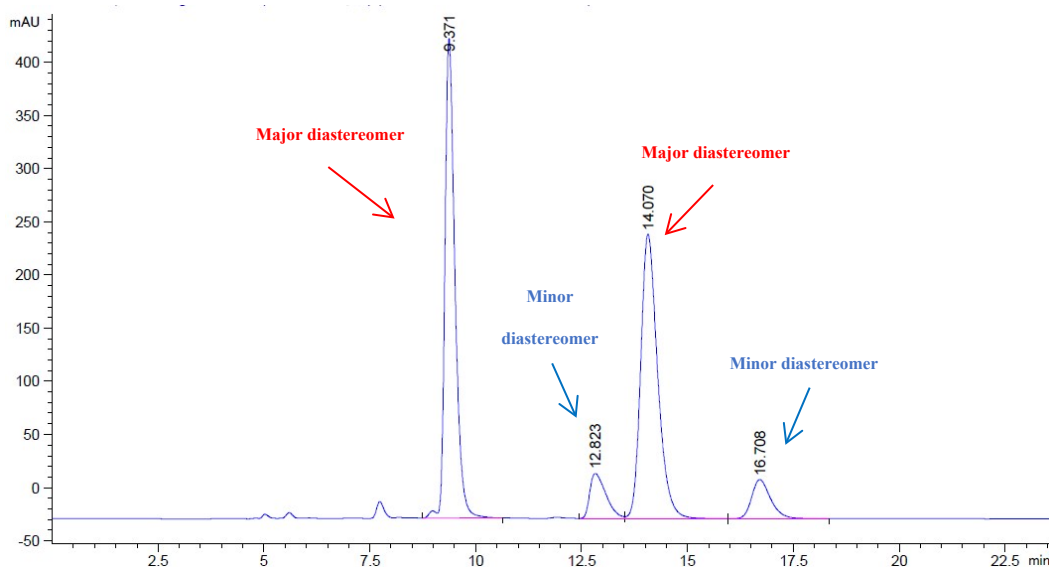

| Peak # | RetTime [min] | Type | Width [min] | Area [mAU*s] | Height [mAU] | Area %  |
|--------|---------------|------|-------------|--------------|--------------|---------|
| 1      | 9.371         | VB R | 0.2469      | 7426.61523   | 451.44104    | 43.3835 |
| 2      | 12.823        | BV   | 0.4165      | 1118.96069   | 42.45557     | 6.5366  |
| 3      | 14.070        | VB   | 0.4209      | 7428.18115   | 267.59888    | 43.3927 |
| 4      | 16.708        | BB   | 0.4758      | 1144.76147   | 36.81086     | 6.6873  |

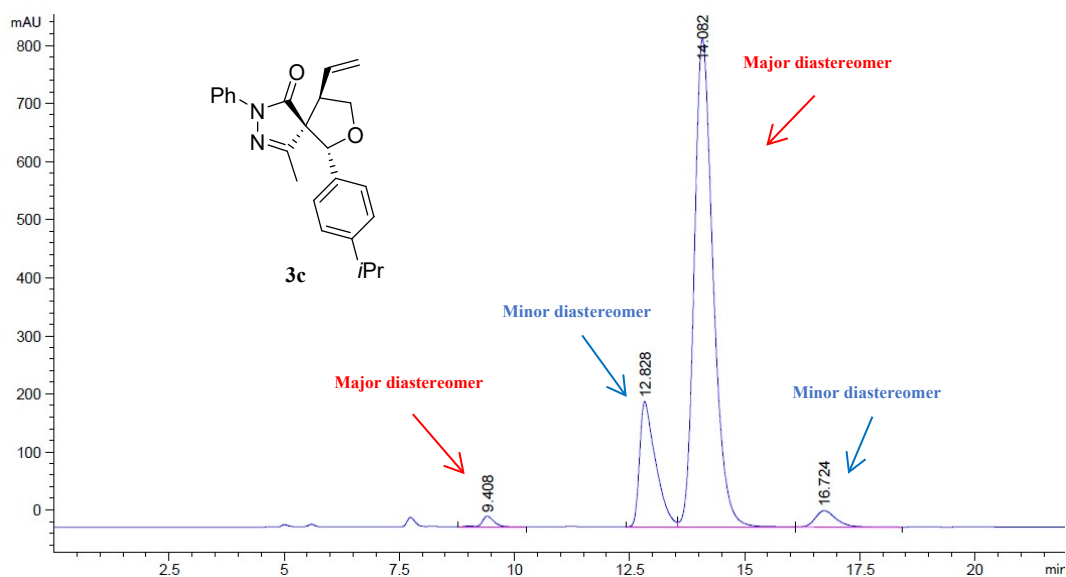

| Peak # | RetTime [min] | Type | Width [min] | Area [mAU*s] | Height [mAU] | Area %  |
|--------|---------------|------|-------------|--------------|--------------|---------|
| 1      | 9.408         | VB R | 0.2574      | 335.31424    | 18.48689     | 1.1073  |
| 2      | 12.828        | BV   | 0.3460      | 5225.16064   | 215.43951    | 17.2552 |
| 3      | 14.082        | VB   | 0.4330      | 2.38420e4    | 840.40344    | 78.7343 |
| 4      | 16.724        | BB   | 0.4704      | 879.12665    | 28.07169     | 2.9032  |

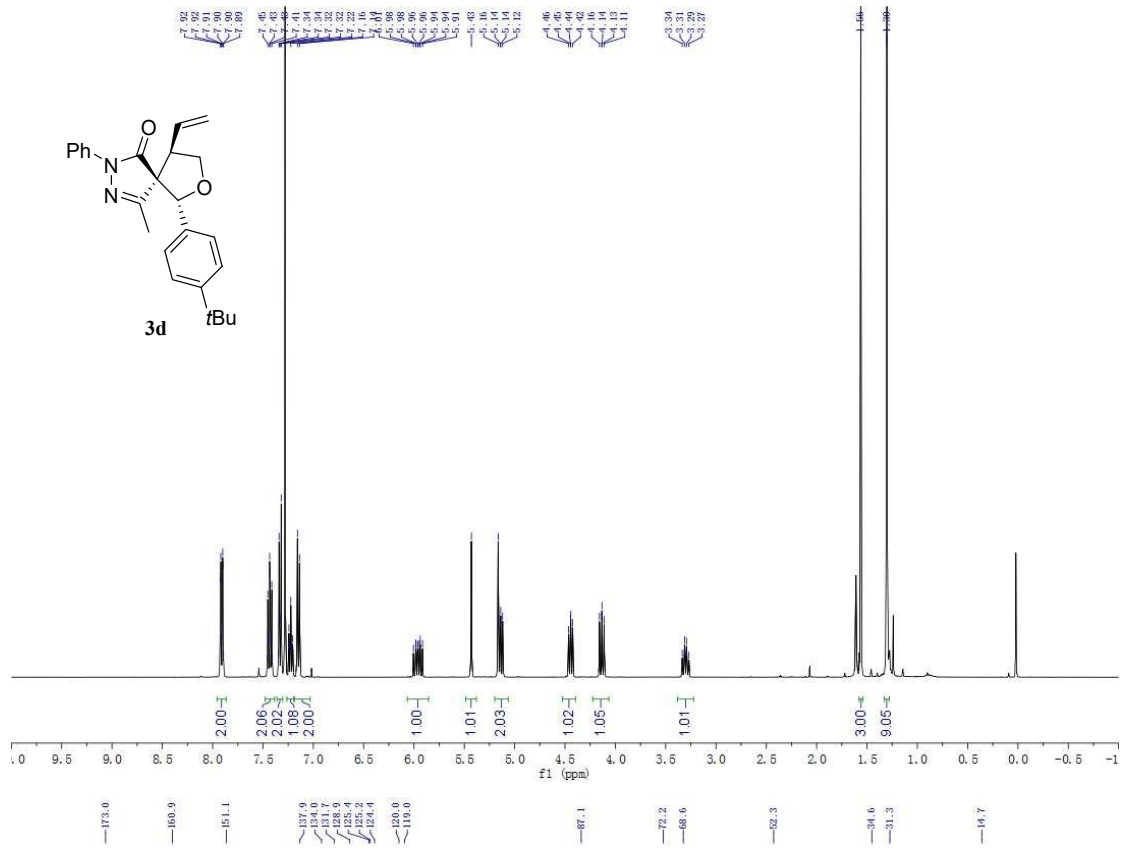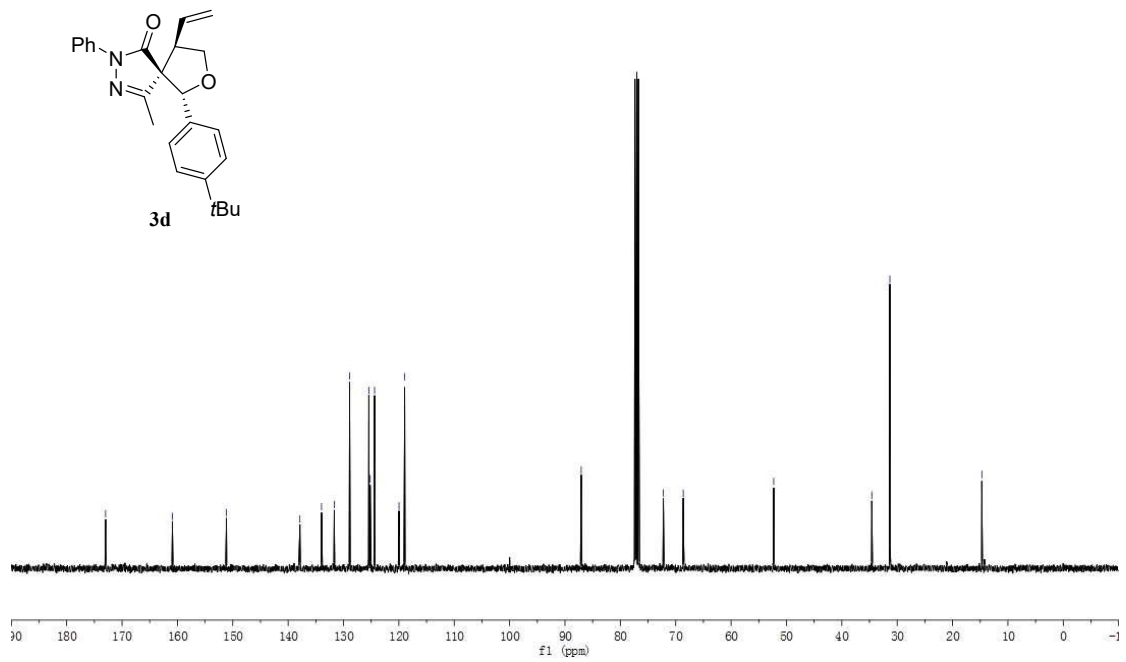



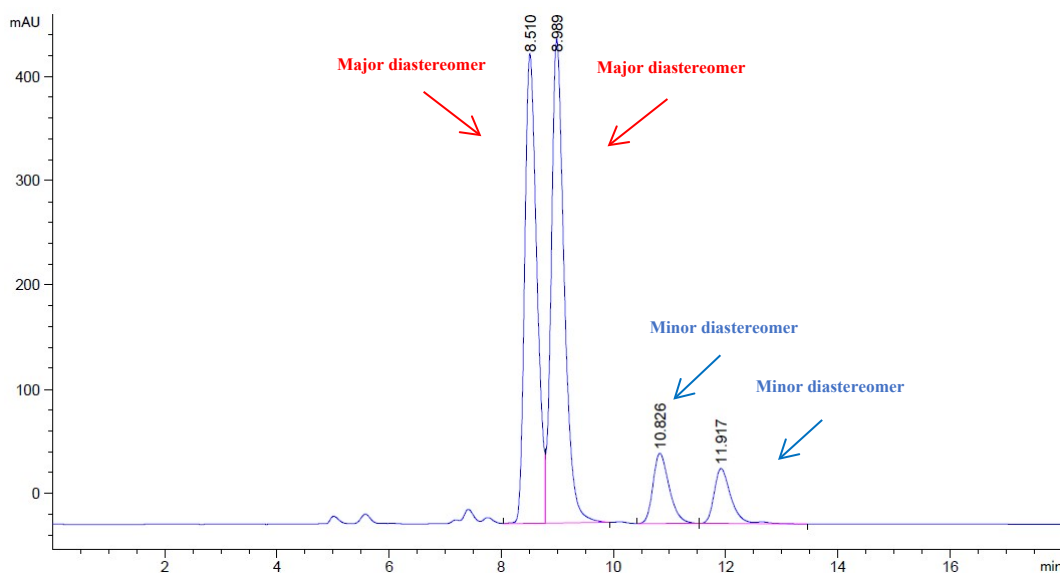

| Peak # | RetTime [min] | Type | Width [min] | Area [mAU*s] | Height [mAU] | Area %  |
|--------|---------------|------|-------------|--------------|--------------|---------|
| 1      | 8.510         | BV   | 0.2305      | 6775.79785   | 450.34171    | 40.6544 |
| 2      | 8.989         | VB   | 0.2420      | 7445.92285   | 464.53021    | 44.6751 |
| 3      | 10.826        | BB   | 0.3042      | 1345.72620   | 67.32690     | 8.0743  |
| 4      | 11.917        | BV R | 0.3143      | 1099.39868   | 52.71207     | 6.5963  |

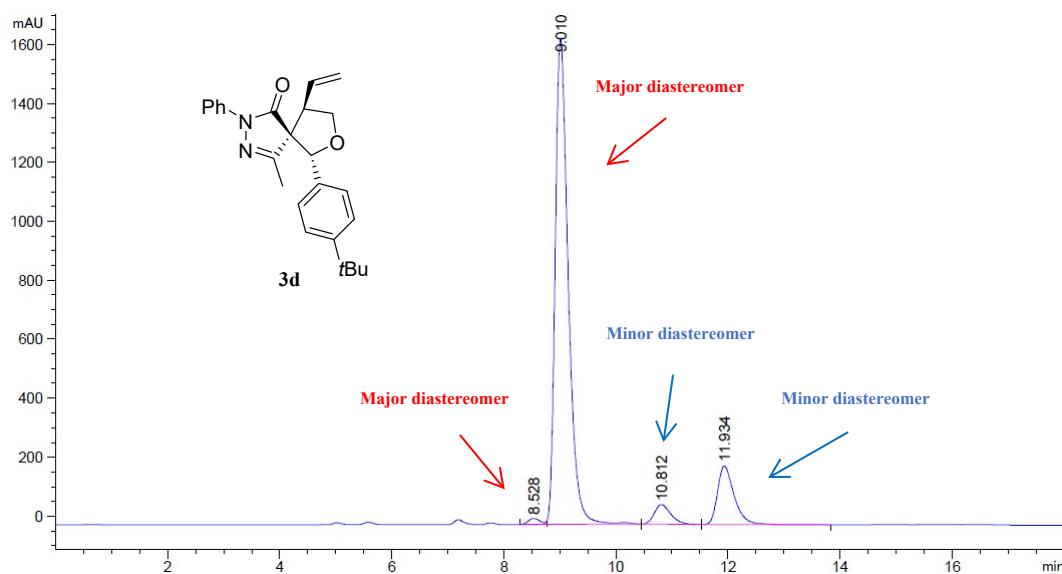

| Peak # | RetTime [min] | Type | Width [min] | Area [mAU*s] | Height [mAU] | Area %  |
|--------|---------------|------|-------------|--------------|--------------|---------|
| 1      | 8.528         | BV E | 0.2180      | 277.98630    | 20.01963     | 0.8629  |
| 2      | 9.010         | VV R | 0.2452      | 2.64822e4    | 1647.21118   | 82.2009 |
| 3      | 10.812        | BB   | 0.3112      | 1366.97607   | 66.68384     | 4.2431  |
| 4      | 11.934        | BB   | 0.3115      | 4089.26318   | 198.40981    | 12.6931 |

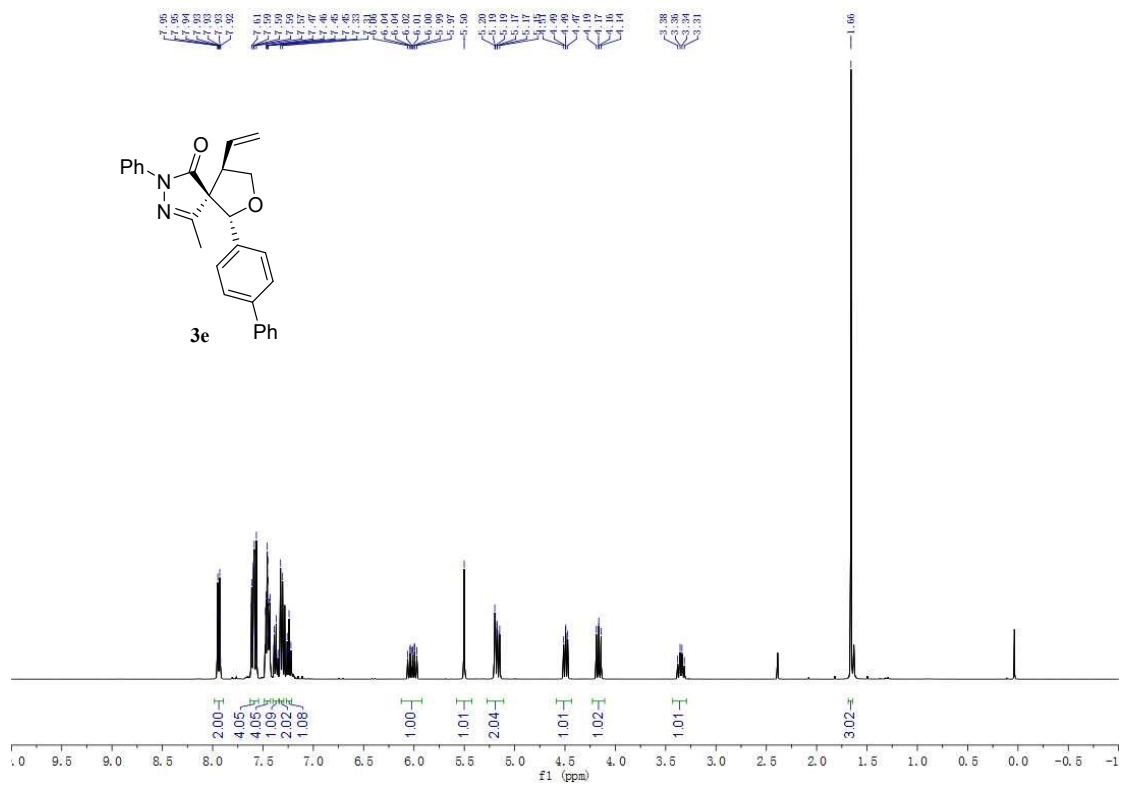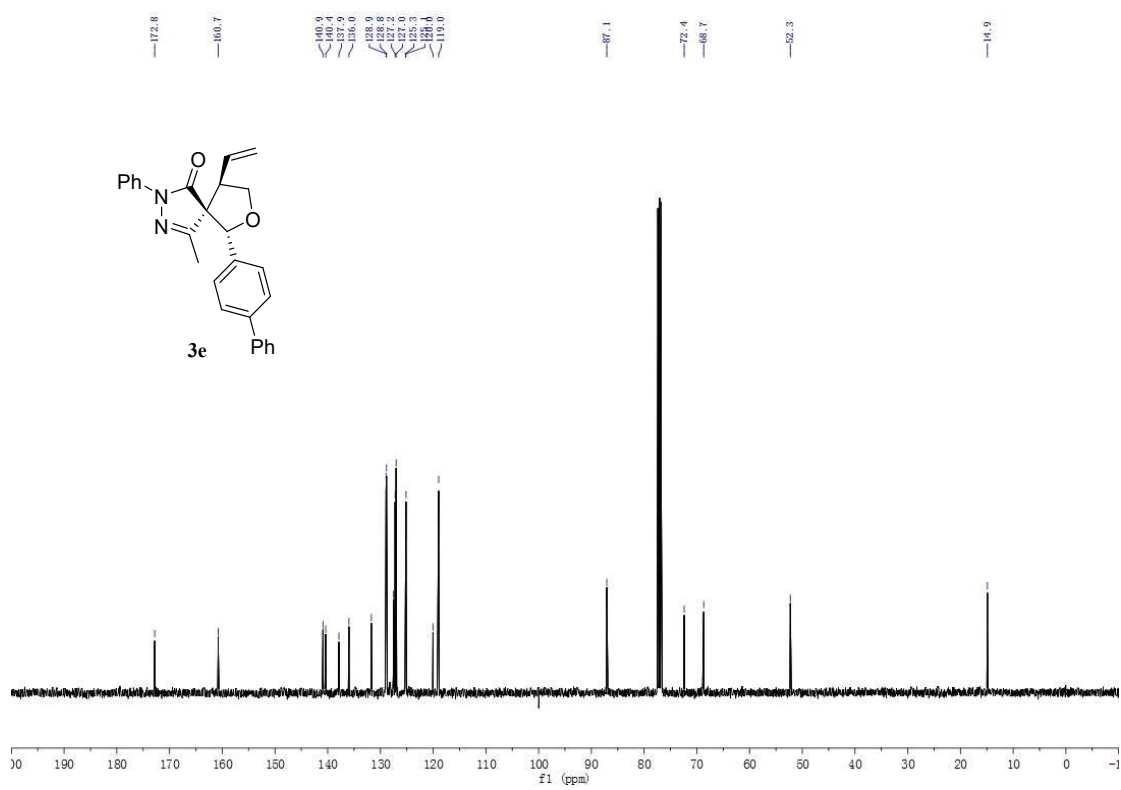

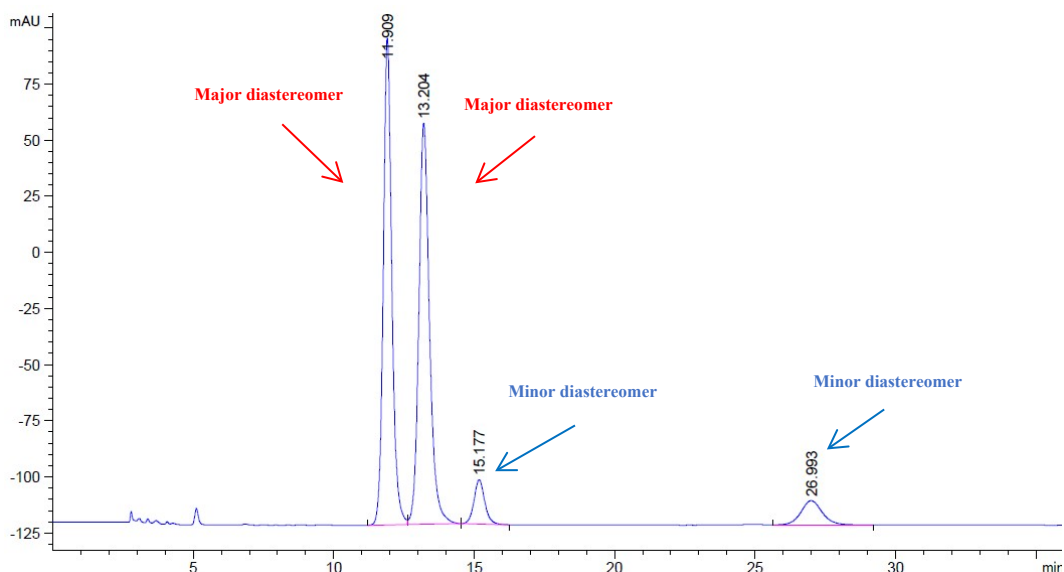

| Peak # | RetTime [min] | Type | Width [min] | Area [mAU*s] | Height [mAU] | Area %  |
|--------|---------------|------|-------------|--------------|--------------|---------|
| 1      | 11.909        | BV   | 0.3188      | 4573.96924   | 217.08252    | 44.0840 |
| 2      | 13.204        | VB   | 0.3961      | 4706.44043   | 178.79344    | 45.3608 |
| 3      | 15.177        | BB   | 0.4033      | 522.03986    | 19.68804     | 5.0314  |
| 4      | 26.993        | BB   | 0.7825      | 573.11578    | 10.84538     | 5.5237  |

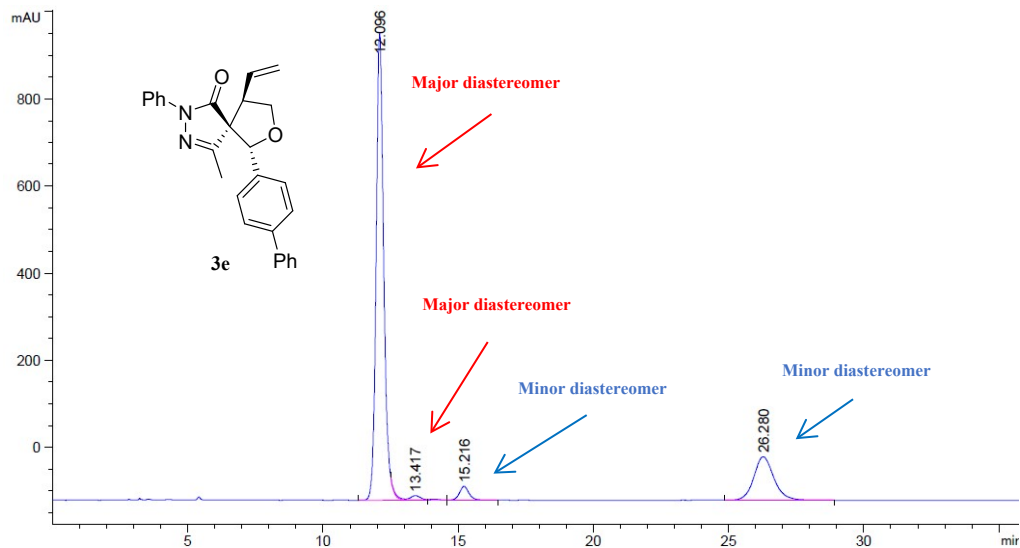

| Peak # | RetTime [min] | Type | Width [min] | Area [mAU*s] | Height [mAU] | Area %  |
|--------|---------------|------|-------------|--------------|--------------|---------|
| 1      | 12.096        | BV R | 0.2948      | 2.09774e4    | 1071.42883   | 76.9236 |
| 2      | 13.417        | VV E | 0.4584      | 346.37708    | 10.76420     | 1.2702  |
| 3      | 15.216        | BB   | 0.3731      | 780.98303    | 31.62971     | 2.8638  |
| 4      | 26.280        | BB   | 0.7876      | 5165.70215   | 99.68423     | 18.9424 |

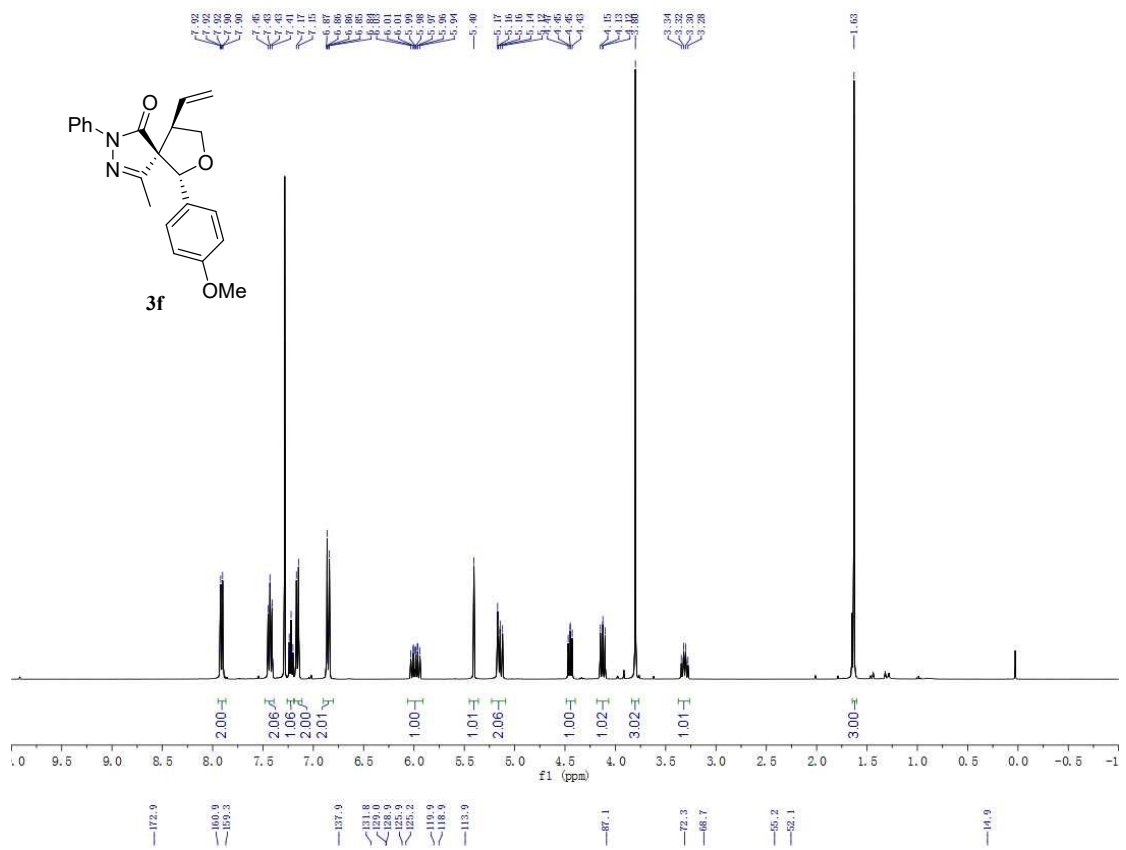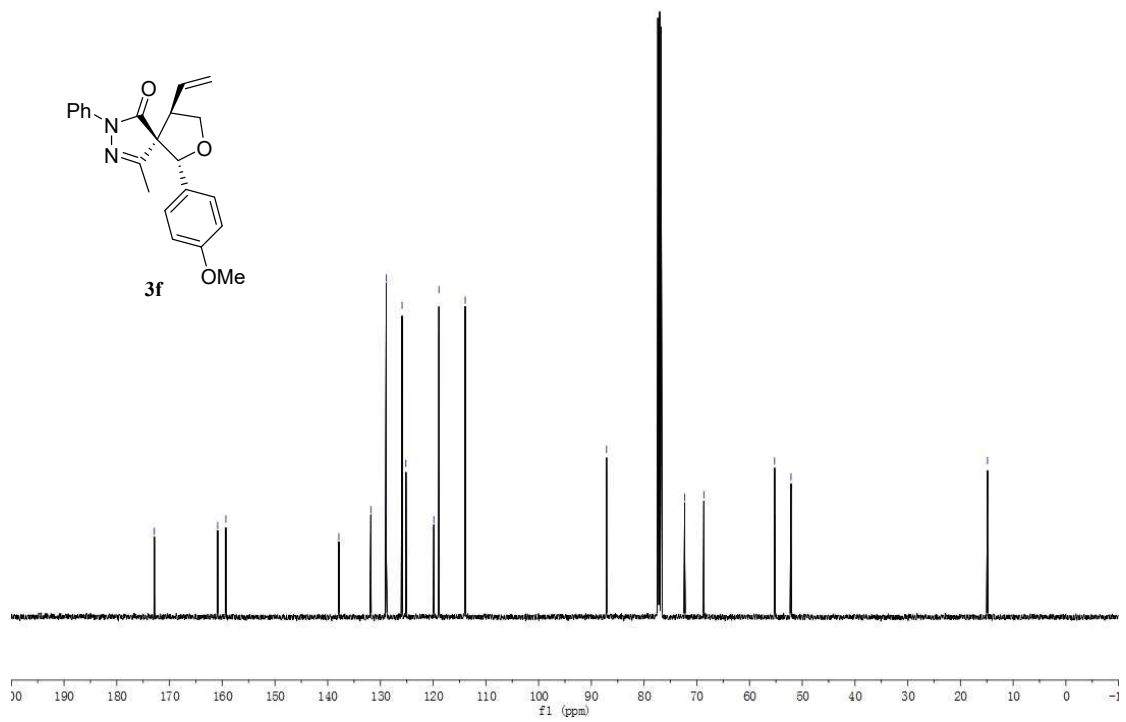

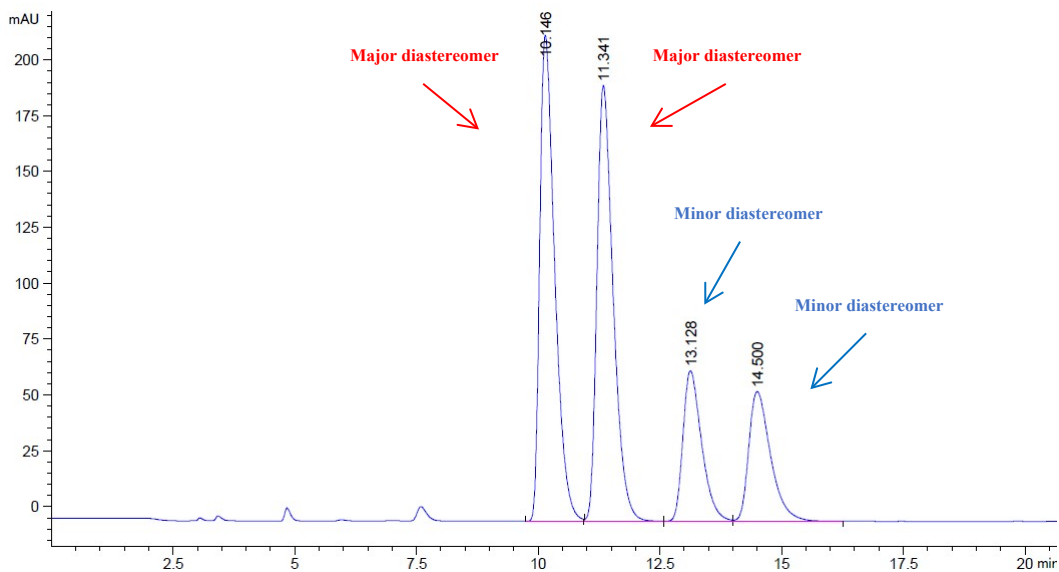

| Peak # | RetTime [min] | Type | Width [min] | Area [mAU*s] | Height [mAU] | Area %  |
|--------|---------------|------|-------------|--------------|--------------|---------|
| 1      | 10.146        | BV   | 0.3280      | 4660.49219   | 217.47002    | 36.4319 |
| 2      | 11.341        | VB   | 0.3526      | 4521.51270   | 194.96413    | 35.3455 |
| 3      | 13.128        | BV   | 0.4056      | 1799.64294   | 67.37967     | 14.0681 |
| 4      | 14.500        | VB   | 0.4760      | 1810.68896   | 58.02831     | 14.1545 |

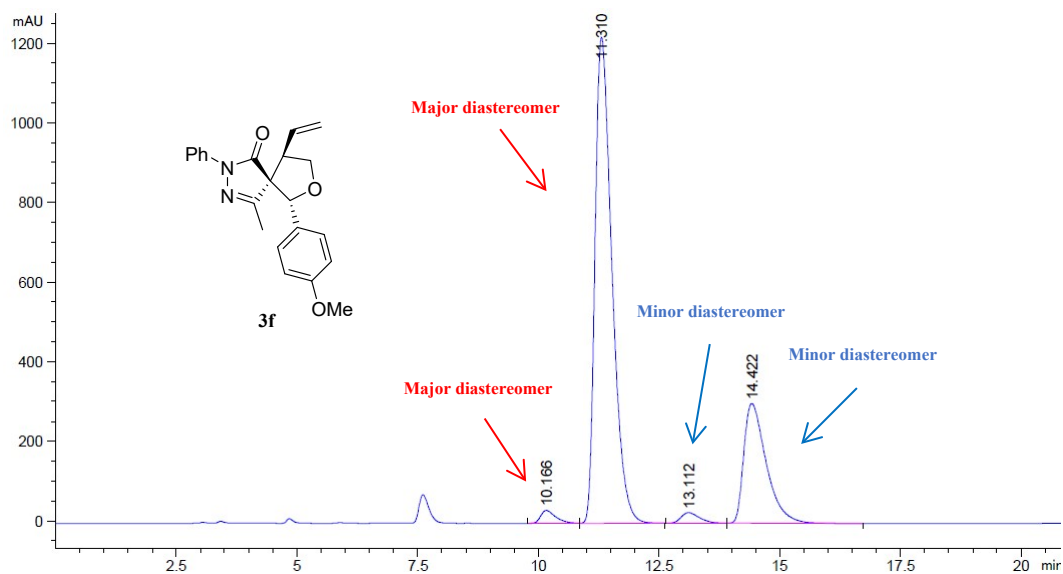

| Peak # | RetTime [min] | Type | Width [min] | Area [mAU*s] | Height [mAU] | Area %  |
|--------|---------------|------|-------------|--------------|--------------|---------|
| 1      | 10.166        | BV   | 0.3258      | 712.32294    | 32.74480     | 1.7411  |
| 2      | 11.310        | VB   | 0.3743      | 2.97545e4    | 1220.88098   | 72.7280 |
| 3      | 13.112        | BV   | 0.4019      | 709.52179    | 26.80070     | 1.7343  |
| 4      | 14.422        | VB   | 0.4923      | 9735.71191   | 301.07224    | 23.7967 |

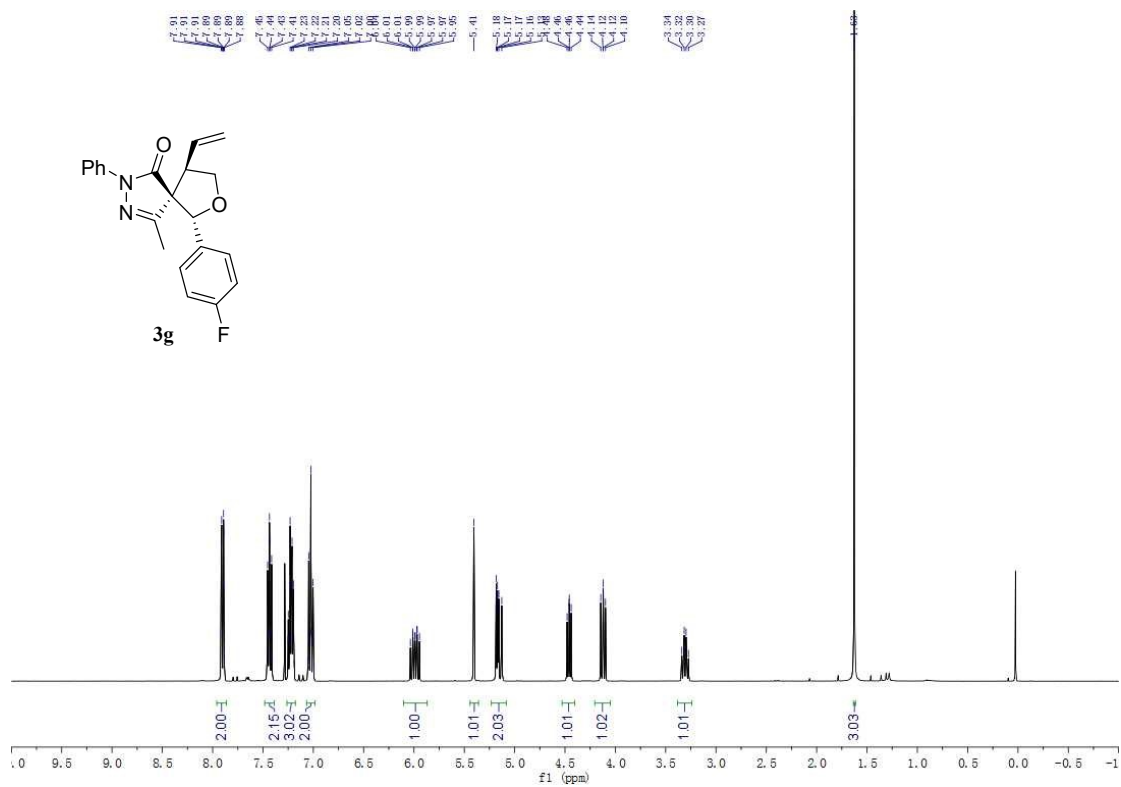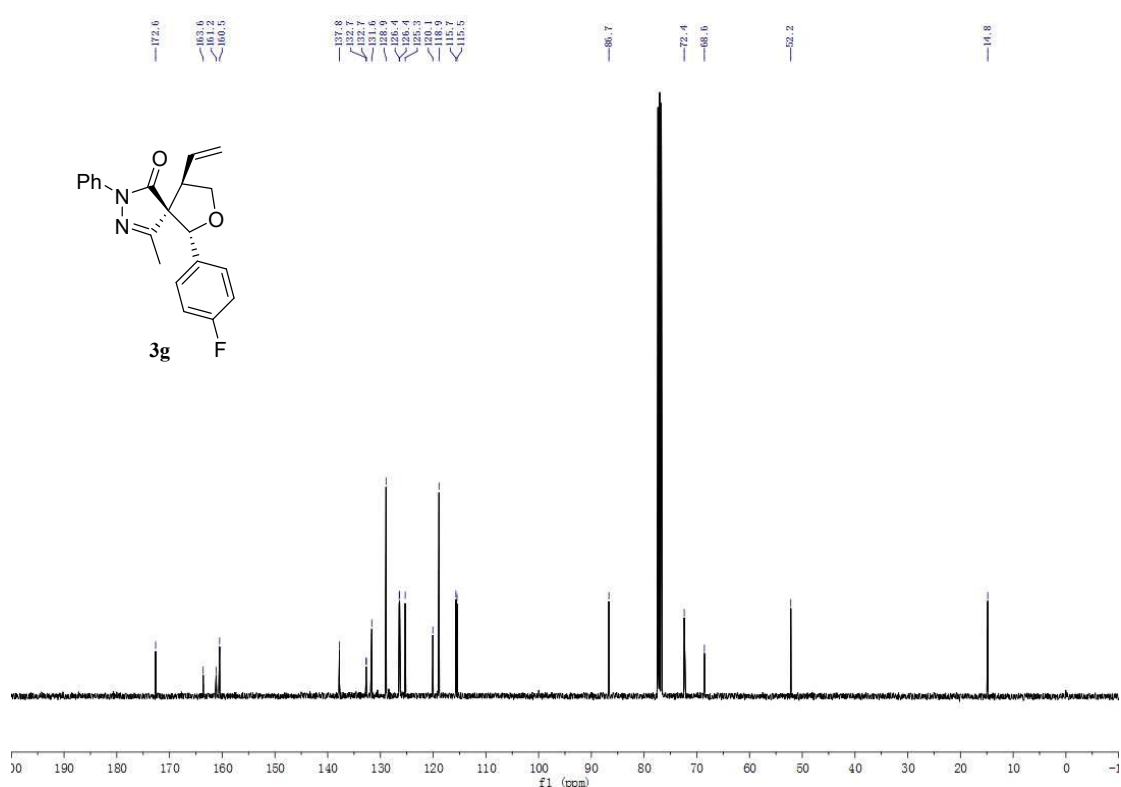

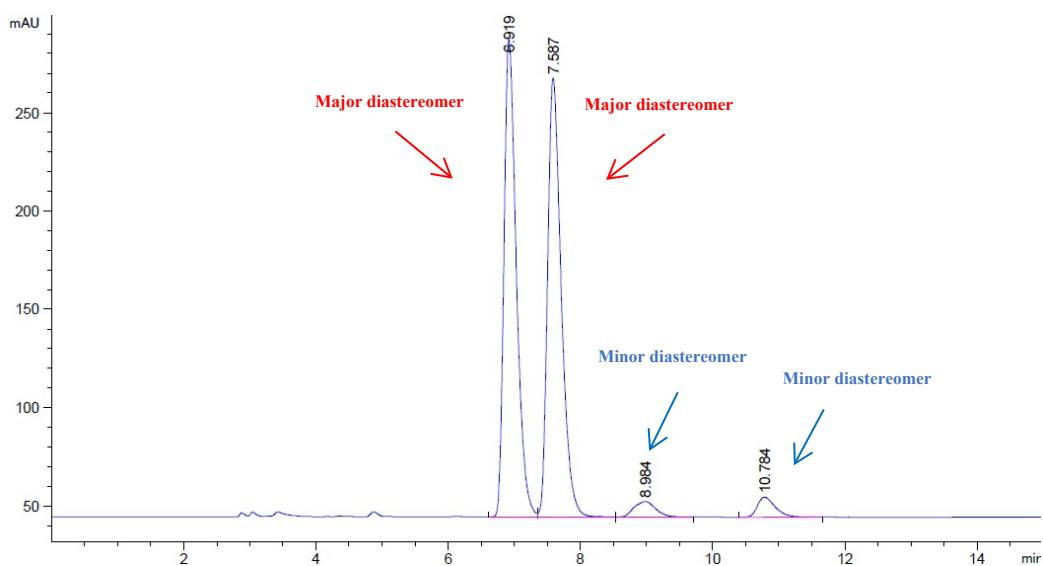

| Peak # | RetTime [min] | Type | Width [min] | Area [mAU*s] | Height [mAU] | Area %  |
|--------|---------------|------|-------------|--------------|--------------|---------|
| 1      | 6.919         | BV   | 0.1975      | 3153.67773   | 242.83080    | 47.0298 |
| 2      | 7.587         | VB   | 0.2175      | 3183.11646   | 223.03360    | 47.4688 |
| 3      | 8.984         | BB   | 0.3649      | 177.85356    | 7.86339      | 2.6523  |
| 4      | 10.784        | BB   | 0.2852      | 191.06012    | 10.16808     | 2.8492  |

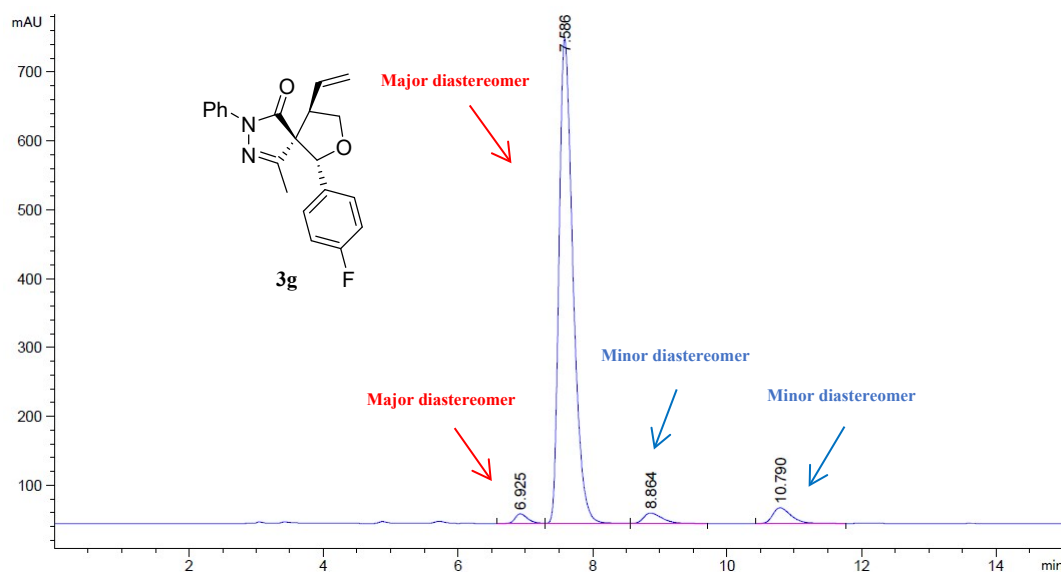

| Peak # | RetTime [min] | Type | Width [min] | Area [mAU*s] | Height [mAU] | Area %  |
|--------|---------------|------|-------------|--------------|--------------|---------|
| 1      | 6.925         | BV   | 0.1974      | 183.34439    | 14.12690     | 1.6611  |
| 2      | 7.586         | VV   | 0.2199      | 1.01282e4    | 703.84113    | 91.7630 |
| 3      | 8.864         | VB   | 0.2920      | 291.23074    | 15.30802     | 2.6386  |
| 4      | 10.790        | BB   | 0.2880      | 434.57275    | 22.93739     | 3.9373  |

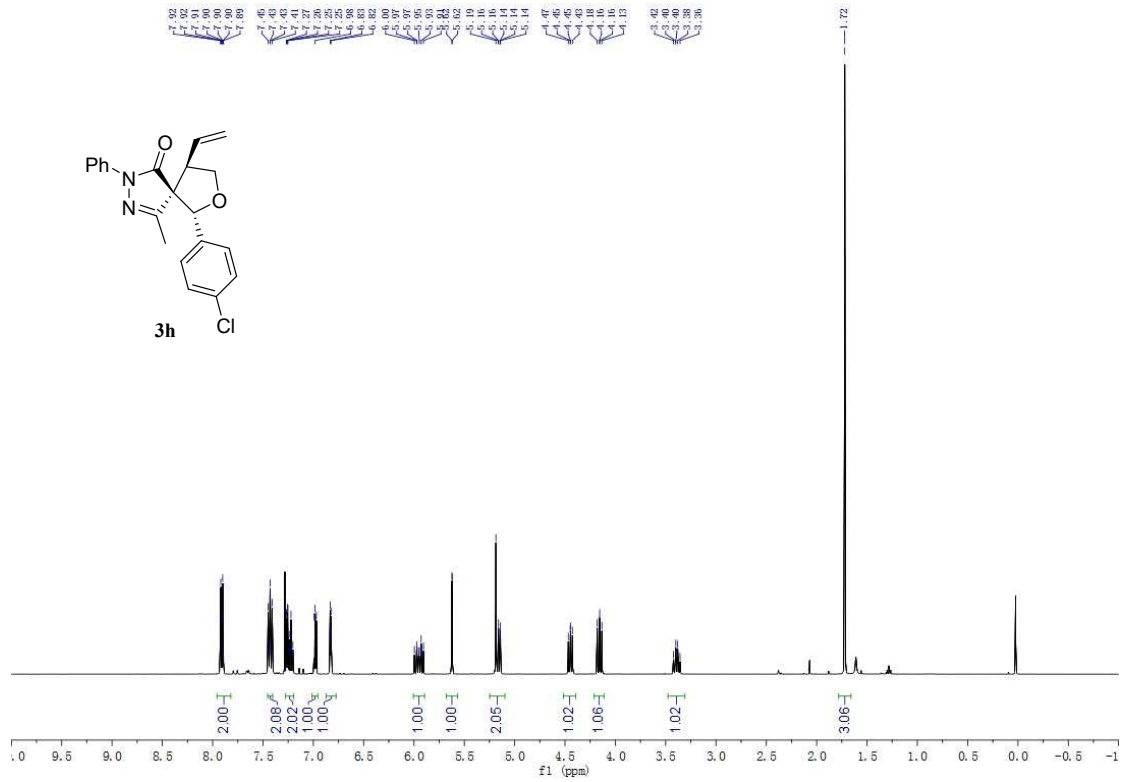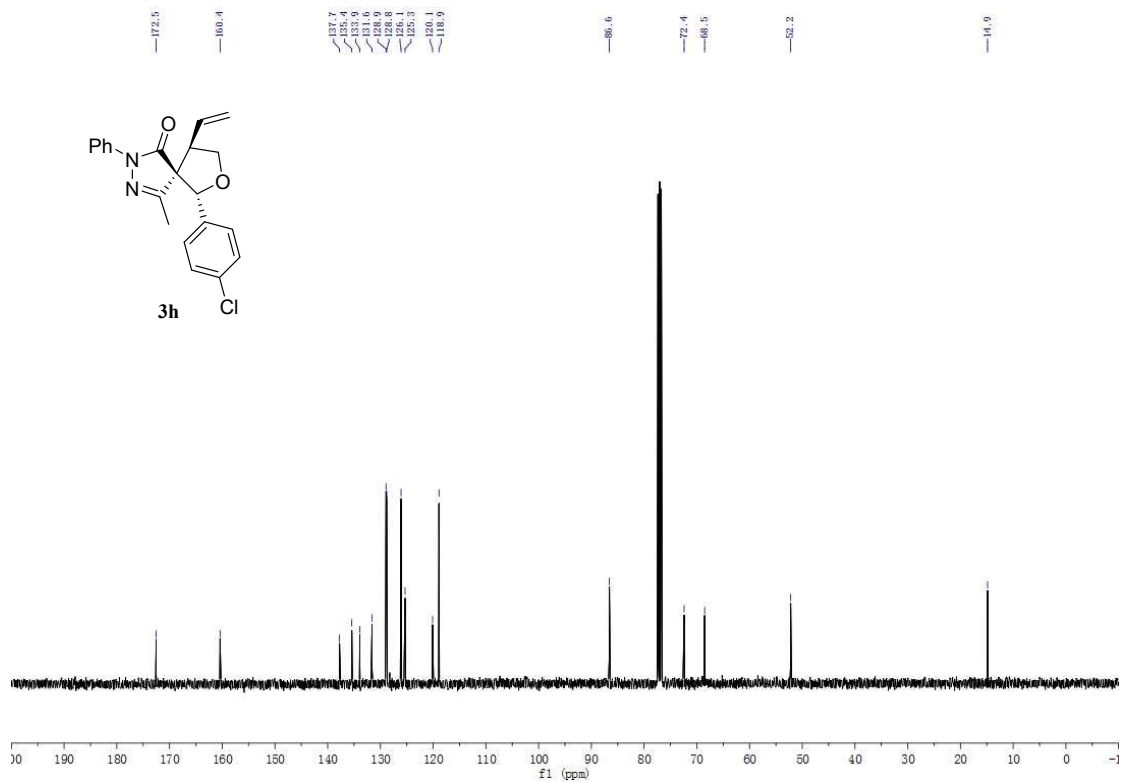



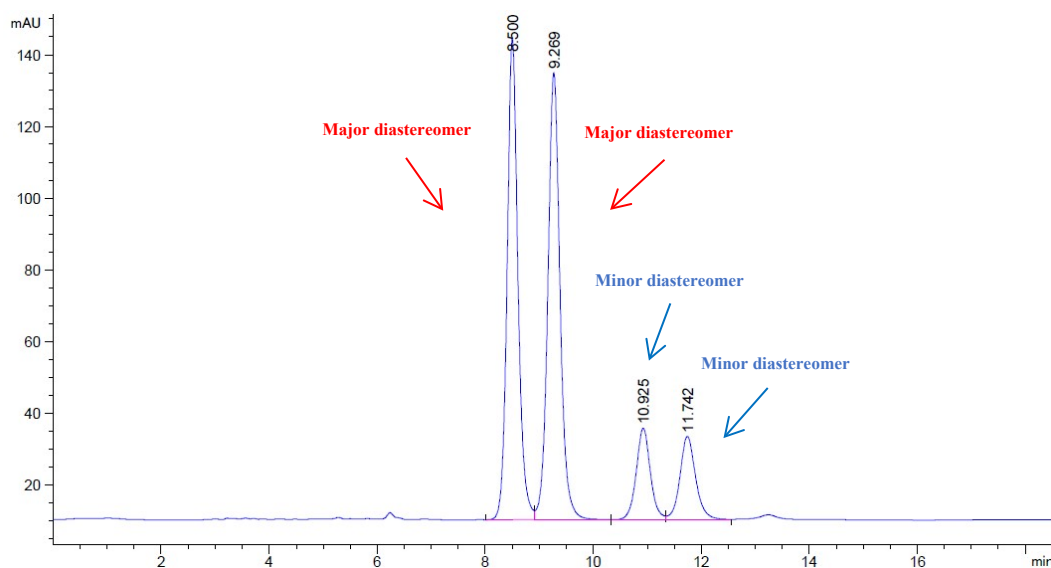

| Peak # | RetTime [min] | Type | Width [min] | Area [mAU*s] | Height [mAU] | Area %  |
|--------|---------------|------|-------------|--------------|--------------|---------|
| 1      | 8.500         | BV   | 0.2108      | 1872.77112   | 134.23164    | 39.4157 |
| 2      | 9.269         | VB   | 0.2365      | 1951.36304   | 124.74901    | 41.0698 |
| 3      | 10.925        | BV   | 0.2751      | 462.81790    | 25.45723     | 9.7408  |
| 4      | 11.742        | VB   | 0.3038      | 464.38257    | 23.17167     | 9.7737  |

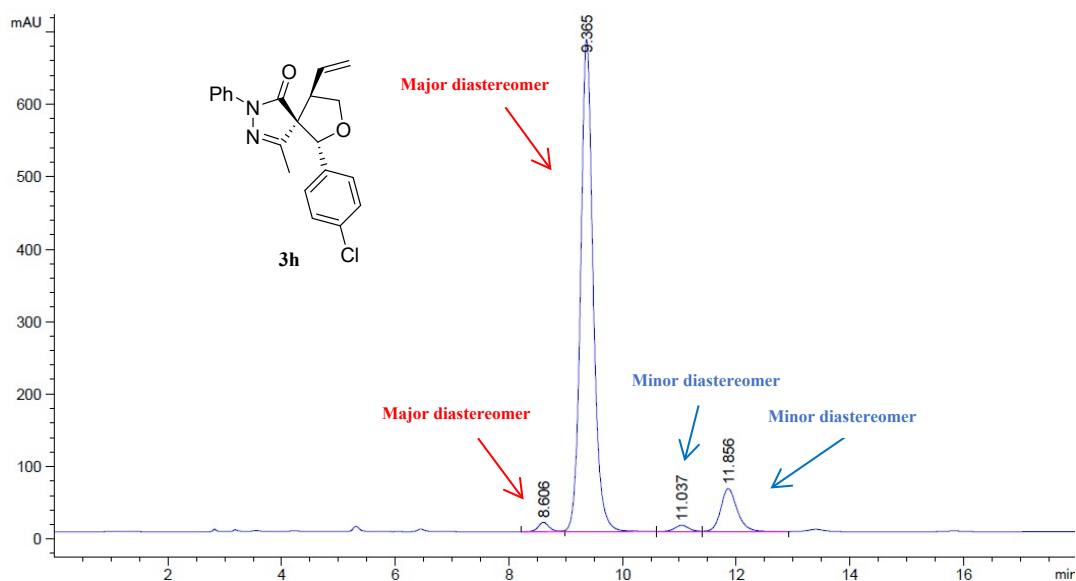

| Peak # | RetTime [min] | Type | Width [min] | Area [mAU*s] | Height [mAU] | Area %  |
|--------|---------------|------|-------------|--------------|--------------|---------|
| 1      | 8.606         | BV E | 0.2062      | 175.59338    | 12.87129     | 1.4720  |
| 2      | 9.365         | VB R | 0.2316      | 1.04057e4    | 679.89783    | 87.2295 |
| 3      | 11.037        | BV   | 0.2674      | 148.79044    | 8.49326      | 1.2473  |
| 4      | 11.856        | VB   | 0.3045      | 1199.02478   | 59.39119     | 10.0513 |

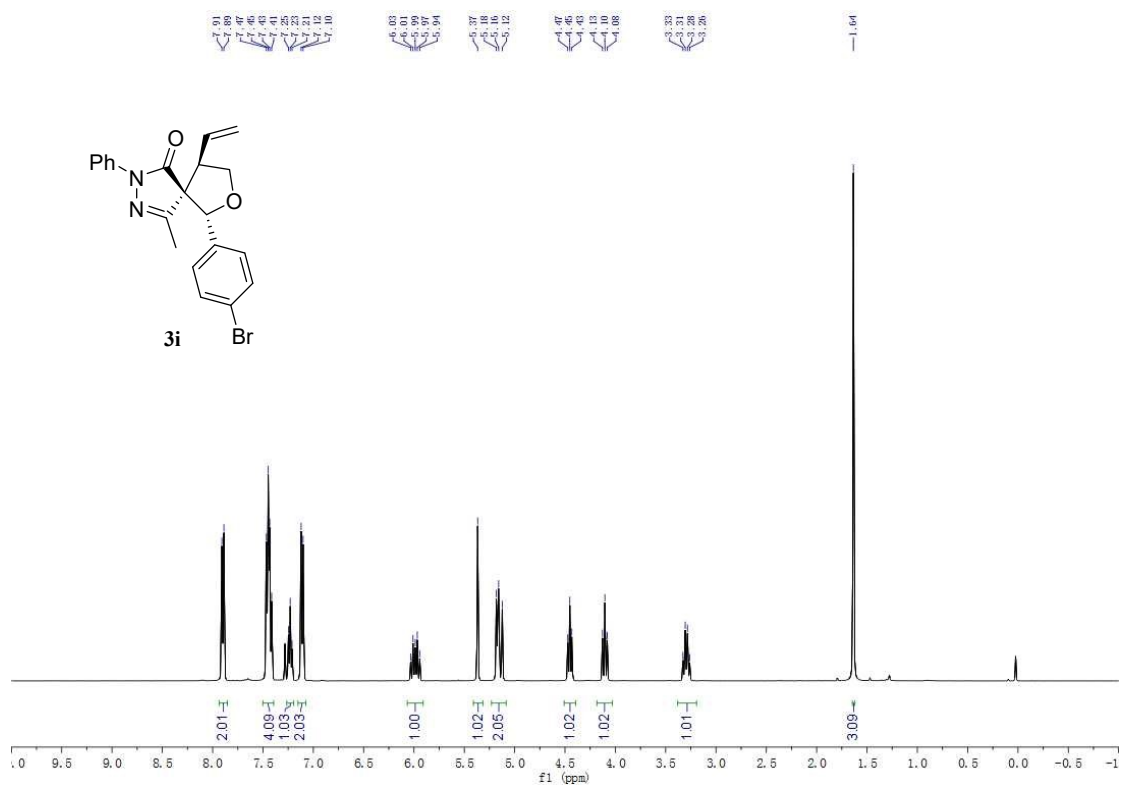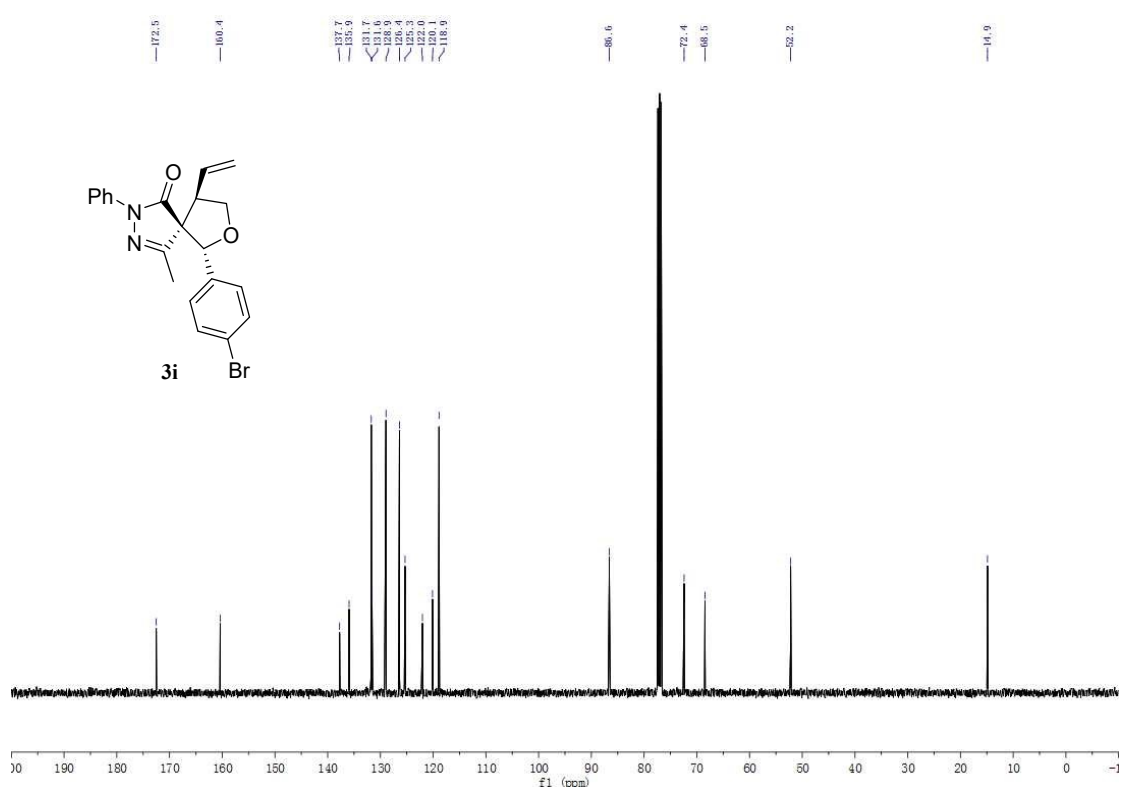

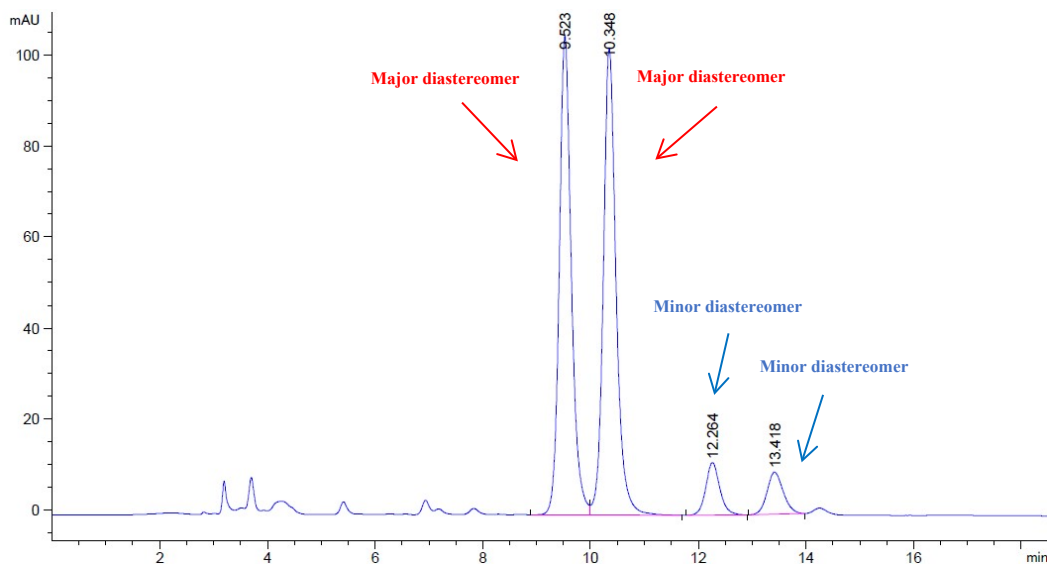

| Peak # | RetTime [min] | Type | Width [min] | Area [mAU*s] | Height [mAU] | Area %  |
|--------|---------------|------|-------------|--------------|--------------|---------|
| 1      | 9.523         | BV   | 0.2357      | 1637.89612   | 105.19537    | 43.9295 |
| 2      | 10.348        | VB   | 0.2467      | 1687.25098   | 102.67364    | 45.2532 |
| 3      | 12.264        | BB   | 0.2738      | 209.72852    | 11.55351     | 5.6251  |
| 4      | 13.418        | BB   | 0.3188      | 193.59175    | 9.26301      | 5.1923  |

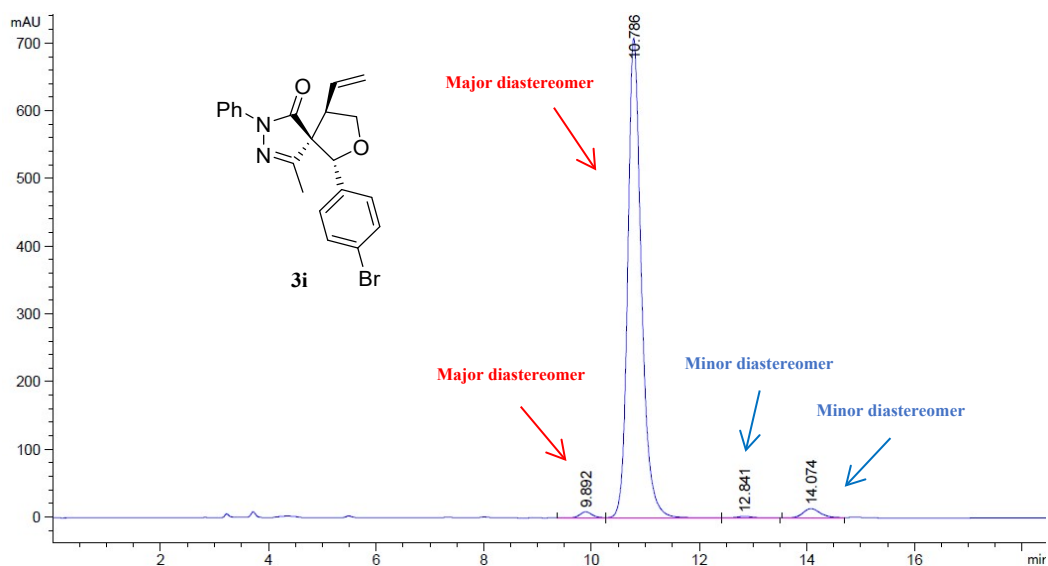

| Peak # | RetTime [min] | Type | Width [min] | Area [mAU*s] | Height [mAU] | Area %  |
|--------|---------------|------|-------------|--------------|--------------|---------|
| 1      | 9.892         | BV   | 0.2443      | 146.01419    | 9.04813      | 1.1213  |
| 2      | 10.786        | VB   | 0.2663      | 1.25274e4    | 708.54755    | 96.2019 |
| 3      | 12.841        | BB   | 0.2887      | 47.81048     | 2.50442      | 0.3672  |
| 4      | 14.074        | BB   | 0.3400      | 300.76077    | 13.49817     | 2.3096  |

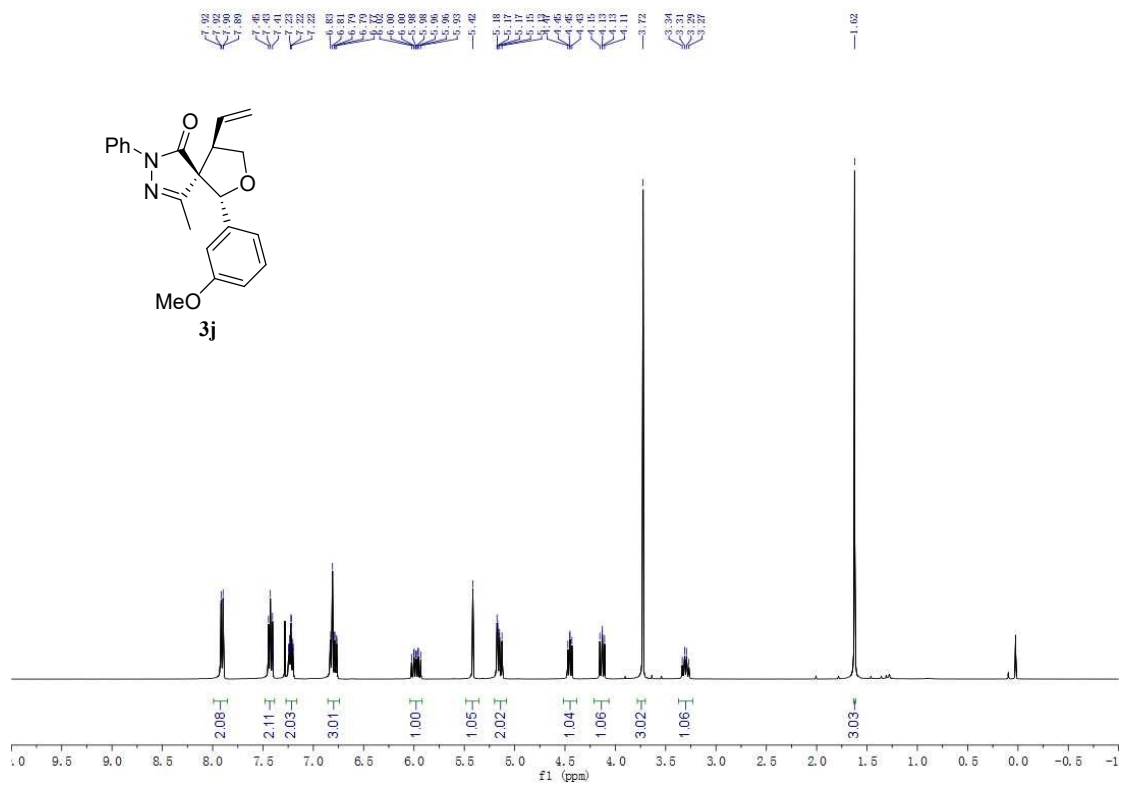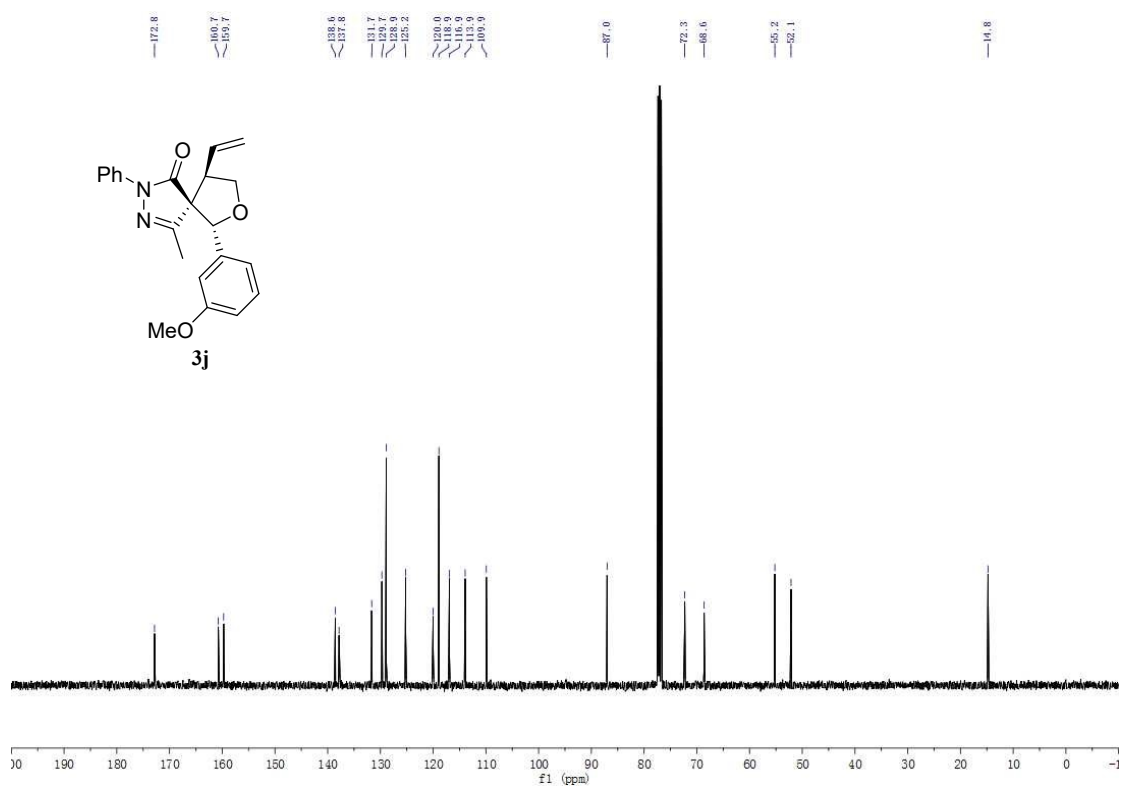

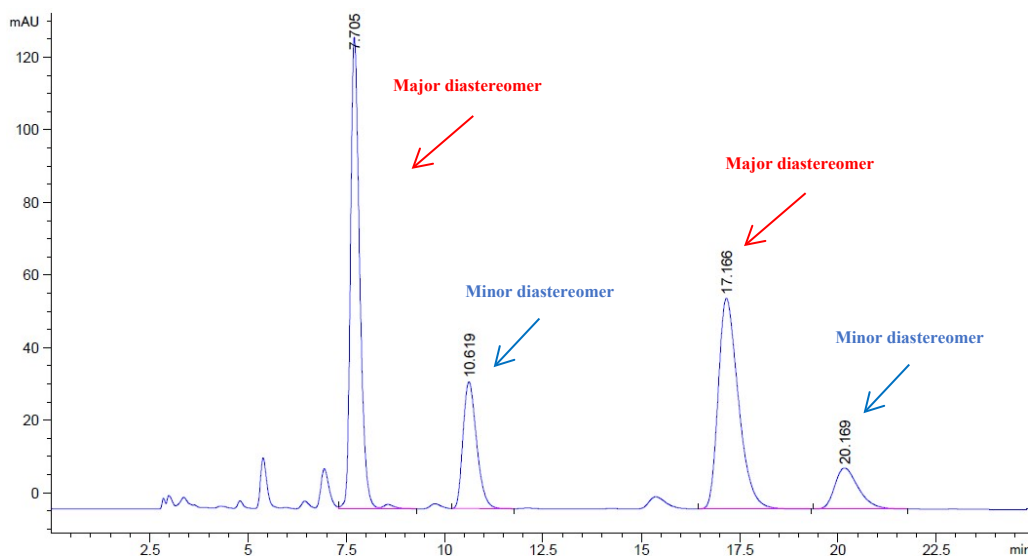

| Peak # | RetTime [min] | Type | Width [min] | Area [mAU*s] | Height [mAU] | Area %  |
|--------|---------------|------|-------------|--------------|--------------|---------|
| 1      | 7.705         | VV R | 0.2475      | 2110.91895   | 129.95506    | 38.4674 |
| 2      | 10.619        | BB   | 0.3736      | 836.72284    | 34.91285     | 15.2477 |
| 3      | 17.166        | BB   | 0.5499      | 2069.24414   | 58.04562     | 37.7080 |
| 4      | 20.169        | BB   | 0.6230      | 470.66351    | 11.29900     | 8.5769  |

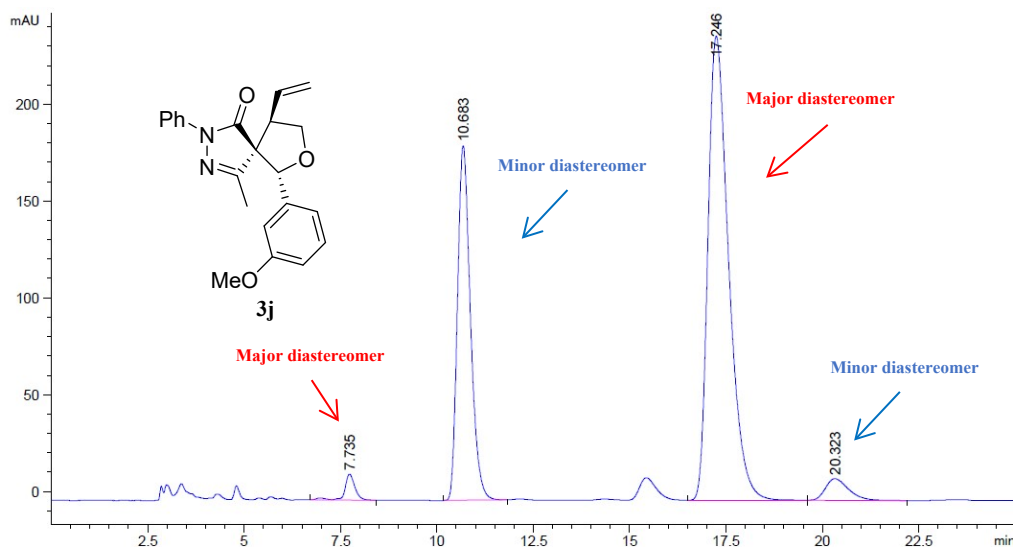

| Peak # | RetTime [min] | Type | Width [min] | Area [mAU*s] | Height [mAU] | Area %  |
|--------|---------------|------|-------------|--------------|--------------|---------|
| 1      | 7.735         | VB R | 0.2734      | 247.93848    | 13.42982     | 1.7855  |
| 2      | 10.683        | BB   | 0.3567      | 4265.29932   | 183.13150    | 30.7152 |
| 3      | 17.246        | BB   | 0.5687      | 8907.58008   | 239.59225    | 64.1452 |
| 4      | 20.323        | BB   | 0.6297      | 465.76721    | 11.11990     | 3.3541  |

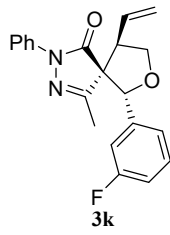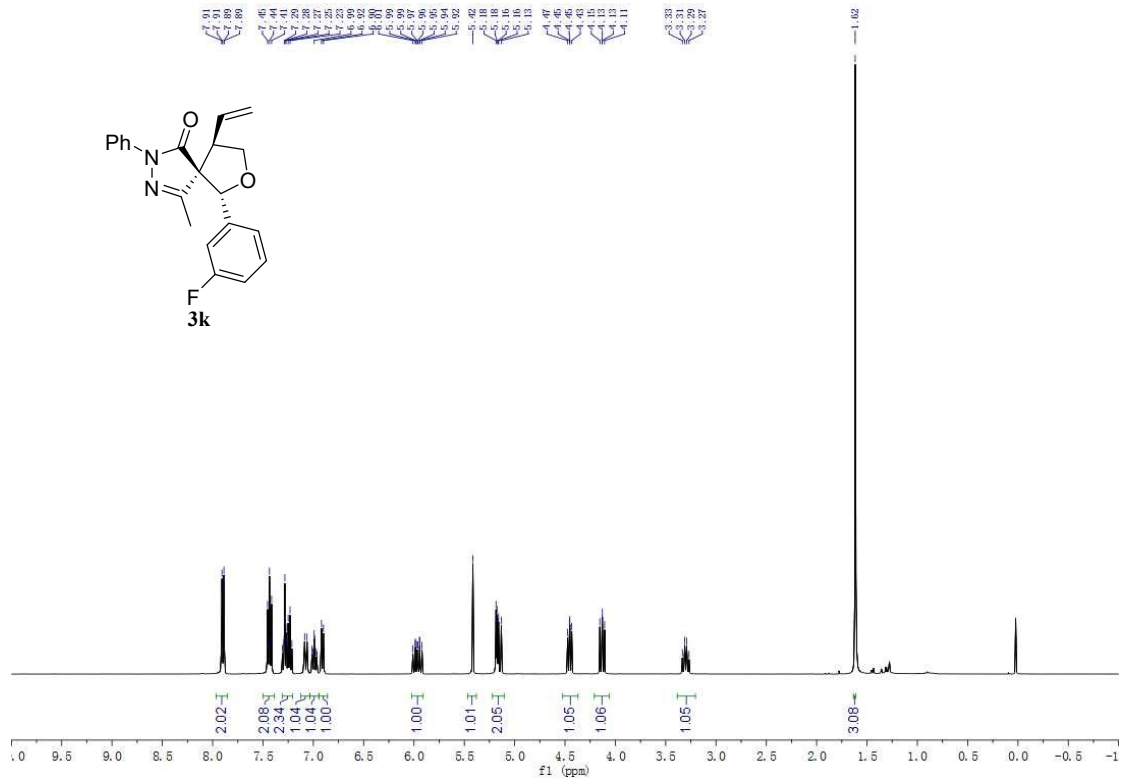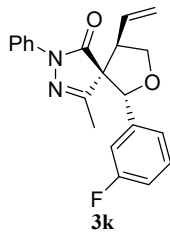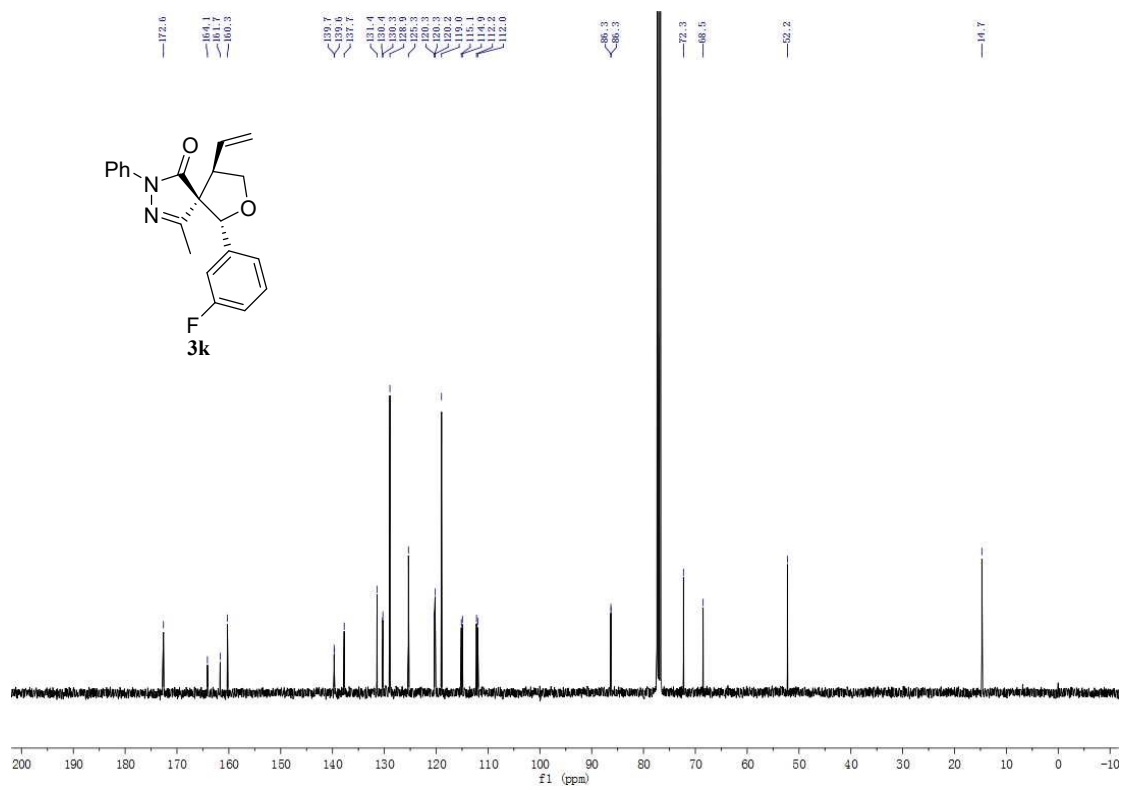

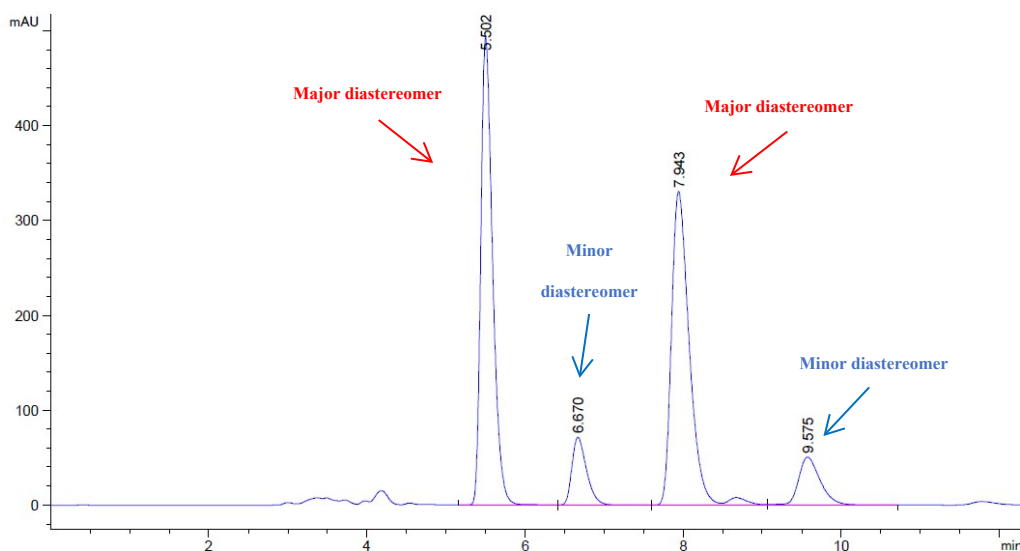

| Peak # | RetTime [min] | Type | Width [min] | Area [mAU*s] | Height [mAU] | Area %  |
|--------|---------------|------|-------------|--------------|--------------|---------|
| 1      | 5.502         | BV   | 0.1592      | 5123.36963   | 493.13336    | 41.8348 |
| 2      | 6.670         | VB   | 0.1962      | 921.89142    | 71.58896     | 7.5277  |
| 3      | 7.943         | BV R | 0.2353      | 5239.55469   | 330.75372    | 42.7835 |
| 4      | 9.575         | VB   | 0.2884      | 961.85419    | 50.67498     | 7.8540  |

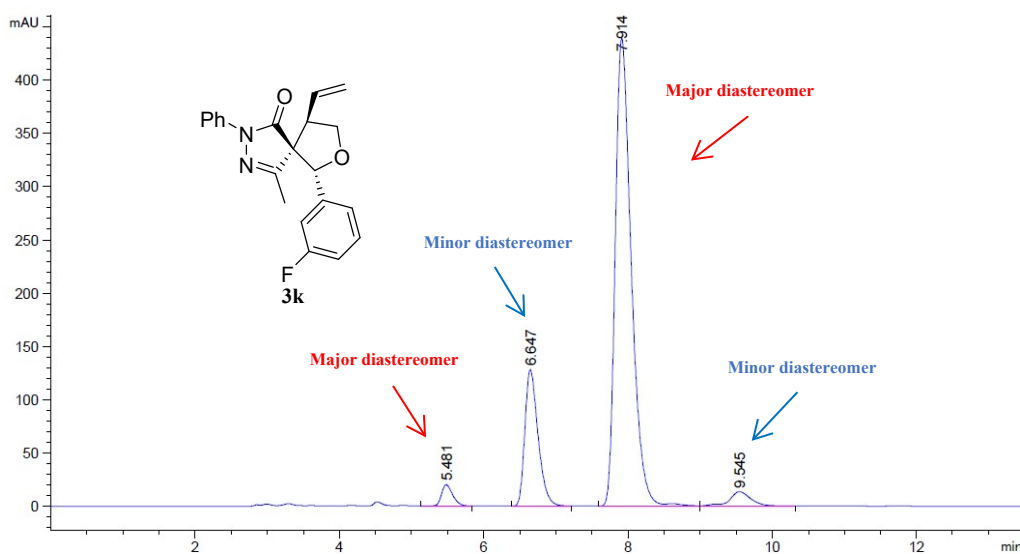

| Peak # | RetTime [min] | Type | Width [min] | Area [mAU*s] | Height [mAU] | Area %  |
|--------|---------------|------|-------------|--------------|--------------|---------|
| 1      | 5.481         | BB   | 0.1653      | 213.80617    | 19.91077     | 2.4063  |
| 2      | 6.647         | BB   | 0.1940      | 1627.87146   | 128.28235    | 18.3212 |
| 3      | 7.914         | BV R | 0.2338      | 6771.42383   | 439.91031    | 76.2103 |
| 4      | 9.545         | VB R | 0.3039      | 272.08014    | 13.40038     | 3.0622  |

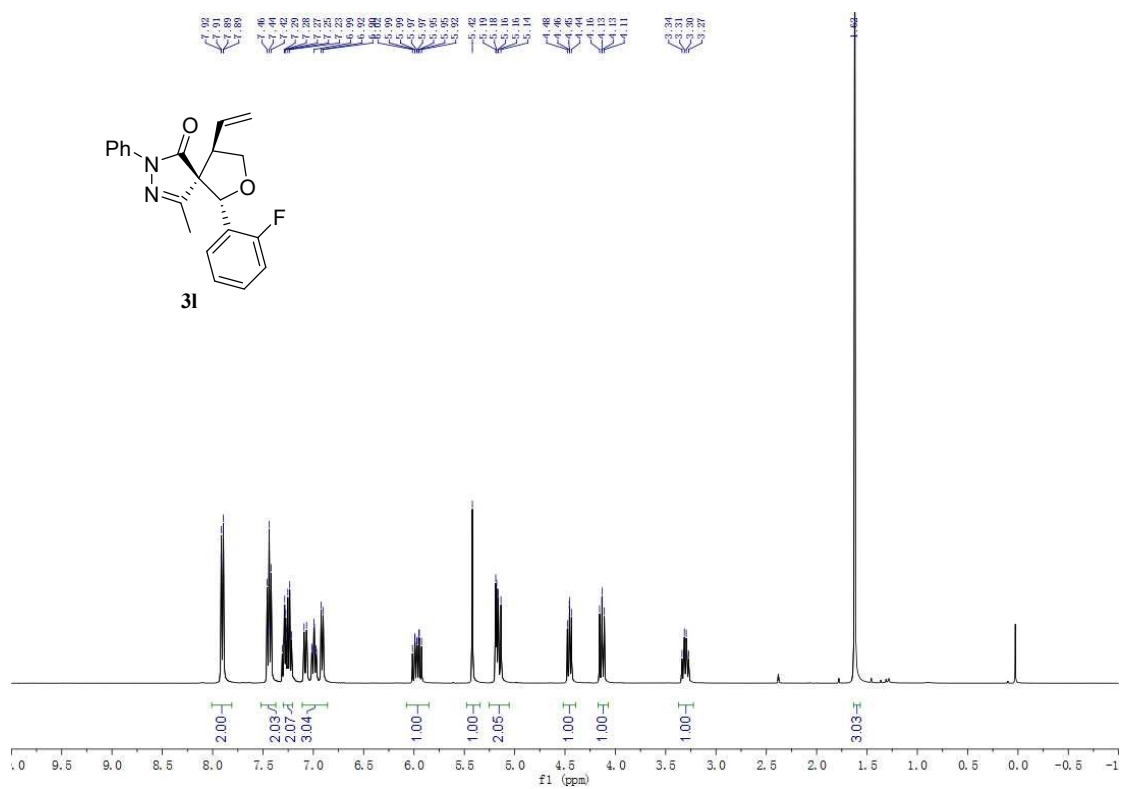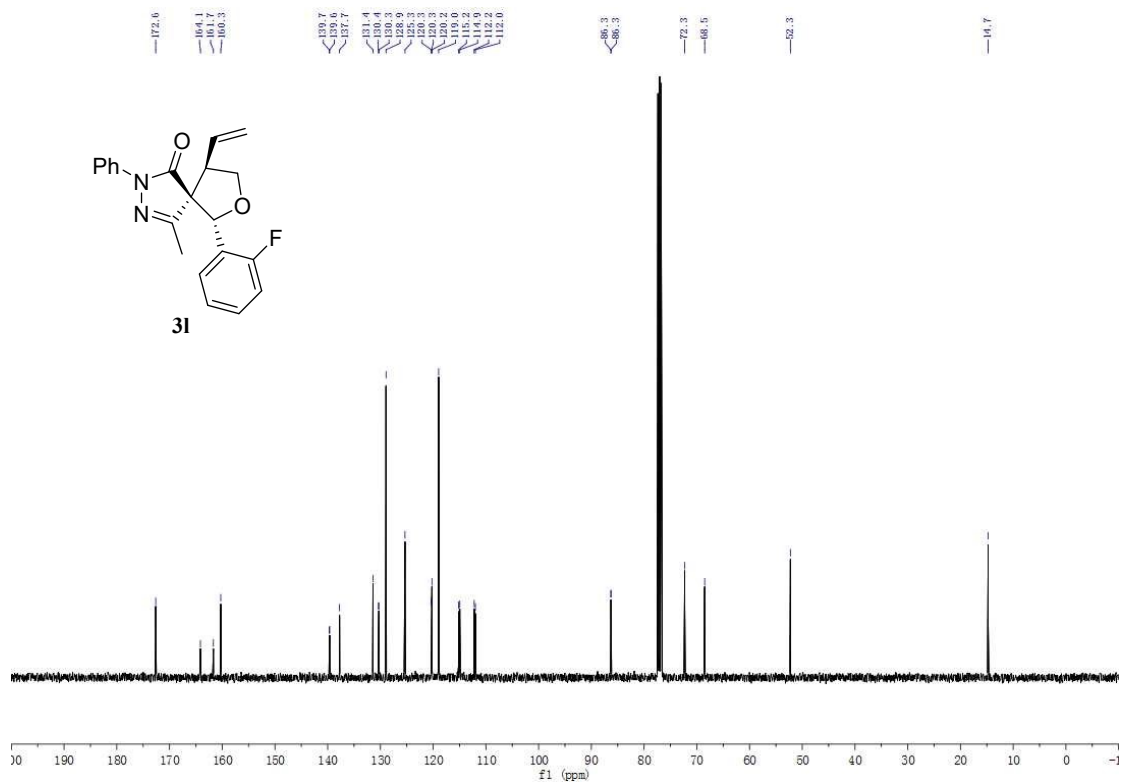



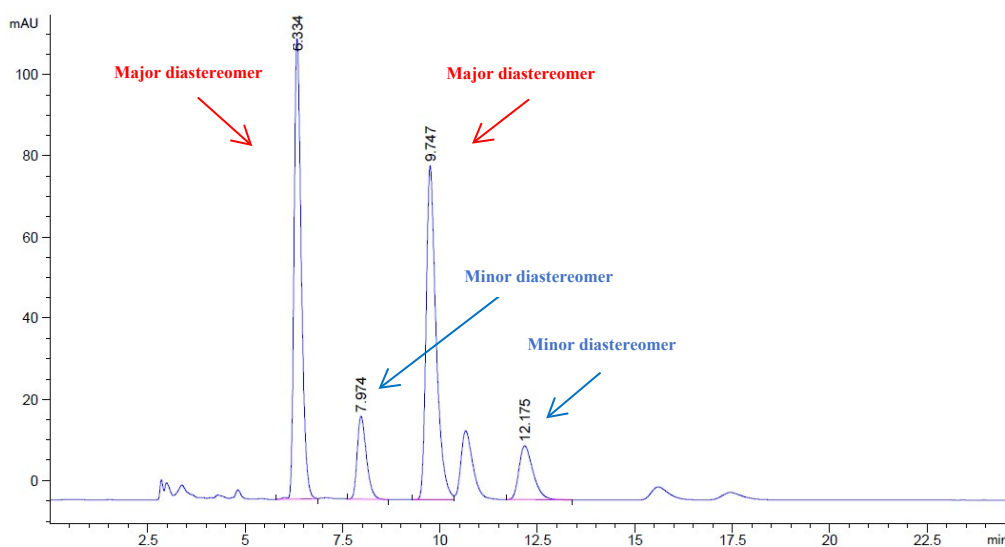

| Peak # | RetTime [min] | Type | Width [min] | Area [mAU*s] | Height [mAU] | Area %  |
|--------|---------------|------|-------------|--------------|--------------|---------|
| 1      | 6.334         | VB R | 0.1969      | 1457.74060   | 113.43548    | 40.6318 |
| 2      | 7.974         | BB   | 0.2516      | 335.49155    | 20.42393     | 9.3512  |
| 3      | 9.747         | BV   | 0.2664      | 1460.72522   | 82.16869     | 40.7150 |
| 4      | 12.175        | BB   | 0.3825      | 333.72293    | 13.26767     | 9.3019  |

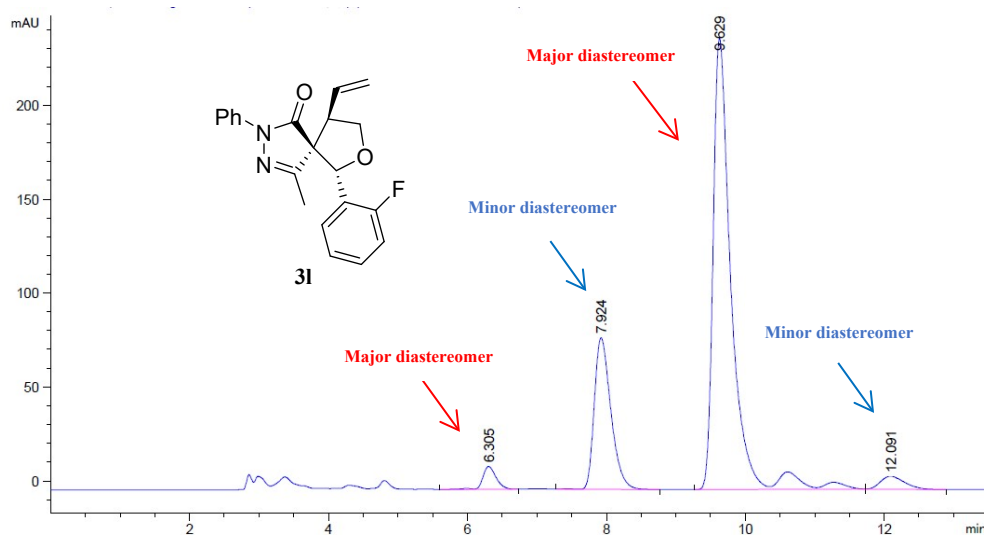

| Peak # | RetTime [min] | Type | Width [min] | Area [mAU*s] | Height [mAU] | Area %  |
|--------|---------------|------|-------------|--------------|--------------|---------|
| 1      | 6.305         | VB R | 0.2047      | 163.67920    | 12.18581     | 2.6903  |
| 2      | 7.924         | VB R | 0.2548      | 1340.79492   | 80.70387     | 22.0380 |
| 3      | 9.629         | BV R | 0.2555      | 4411.87744   | 240.35065    | 72.5160 |
| 4      | 12.091        | BB   | 0.3734      | 167.65053    | 6.92540      | 2.7556  |

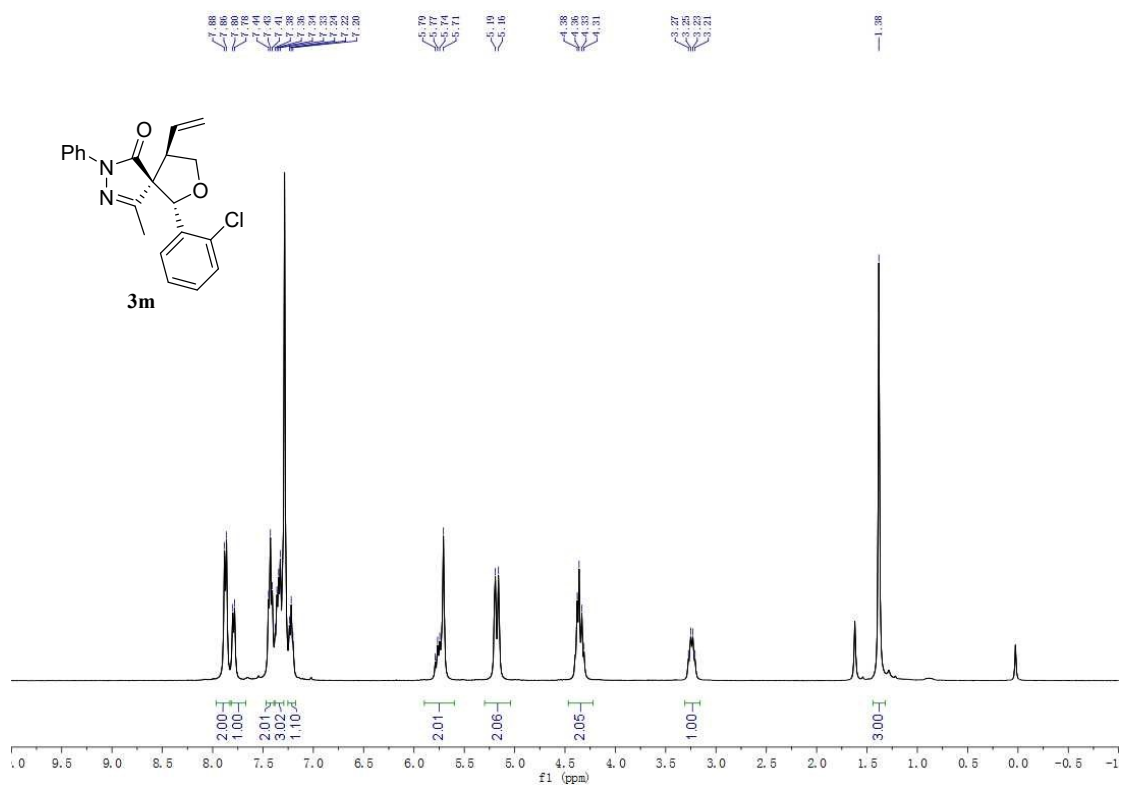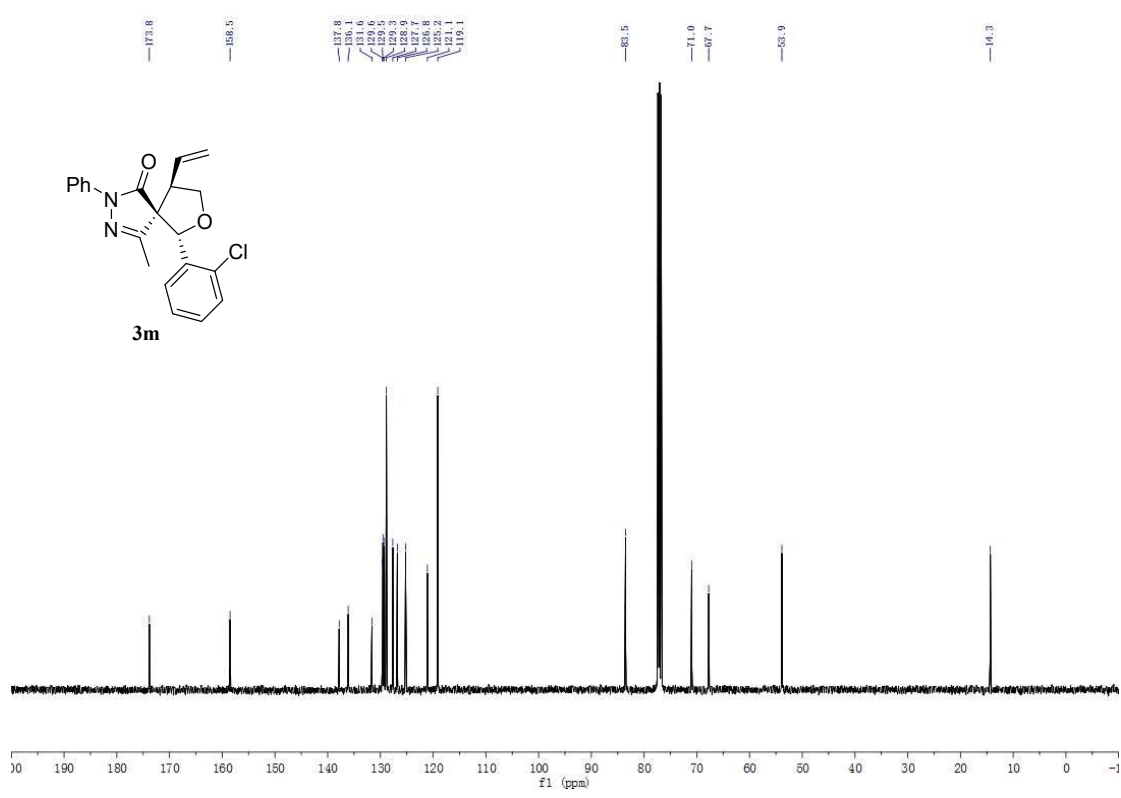

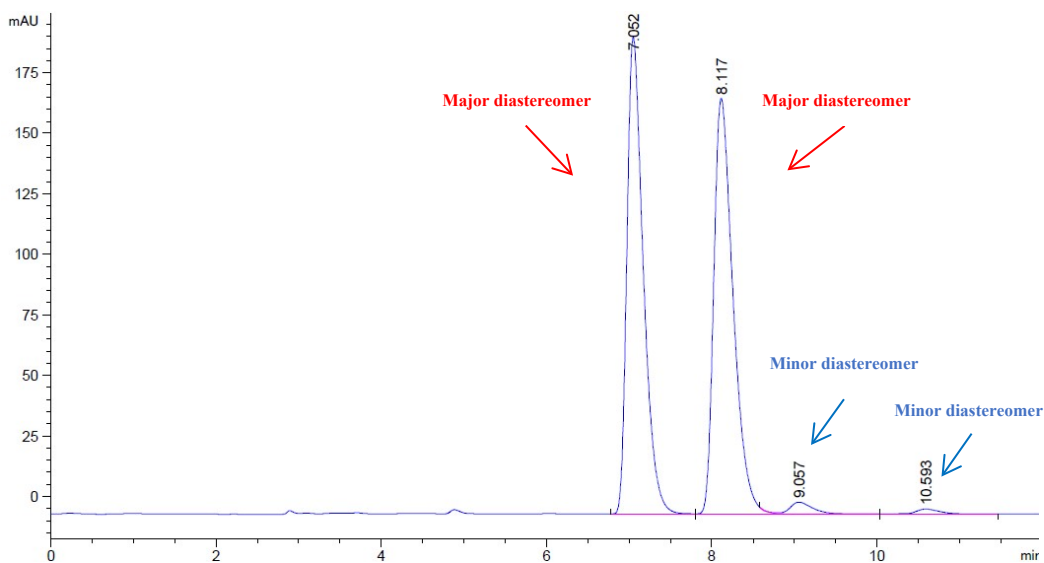

| Peak # | RetTime [min] | Type | Width [min] | Area [mAU*s] | Height [mAU] | Area %  |
|--------|---------------|------|-------------|--------------|--------------|---------|
| 1      | 7.052         | BB   | 0.2085      | 2711.14453   | 197.06419    | 48.1505 |
| 2      | 8.117         | BV R | 0.2461      | 2784.05420   | 171.74294    | 49.4454 |
| 3      | 9.057         | VB E | 0.2856      | 92.78759     | 4.86241      | 1.6479  |
| 4      | 10.593        | BB   | 0.2999      | 42.57981     | 2.09712      | 0.7562  |

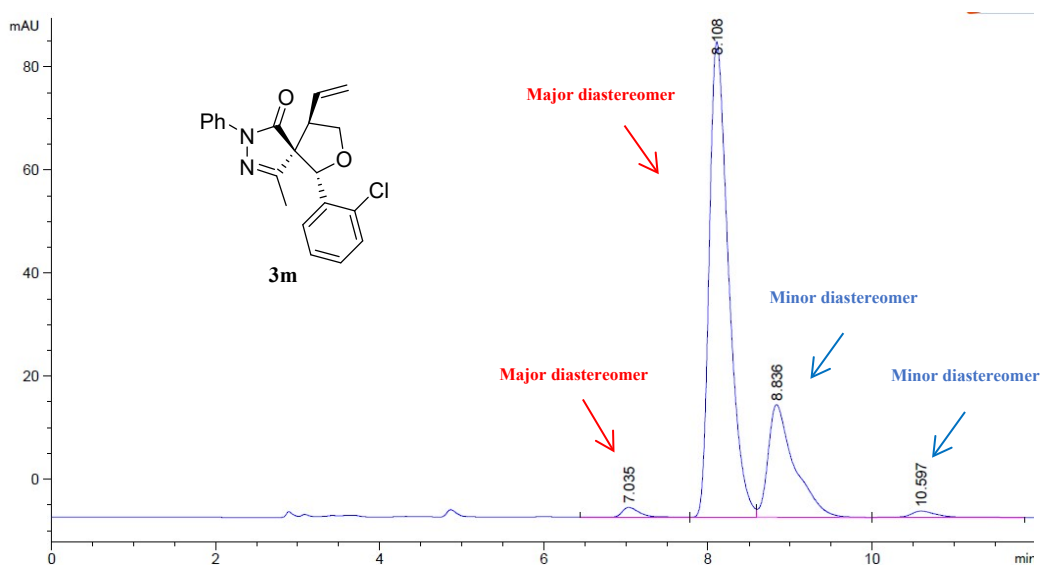

| Peak # | RetTime [min] | Type | Width [min] | Area [mAU*s] | Height [mAU] | Area %  |
|--------|---------------|------|-------------|--------------|--------------|---------|
| 1      | 7.035         | VB R | 0.2191      | 28.80957     | 1.93619      | 1.4083  |
| 2      | 8.108         | BV   | 0.2464      | 1503.82275   | 92.12729     | 73.5126 |
| 3      | 8.836         | VB   | 0.3196      | 486.36945    | 21.85480     | 23.7756 |
| 4      | 10.597        | BB   | 0.3194      | 26.66484     | 1.23723      | 1.3035  |

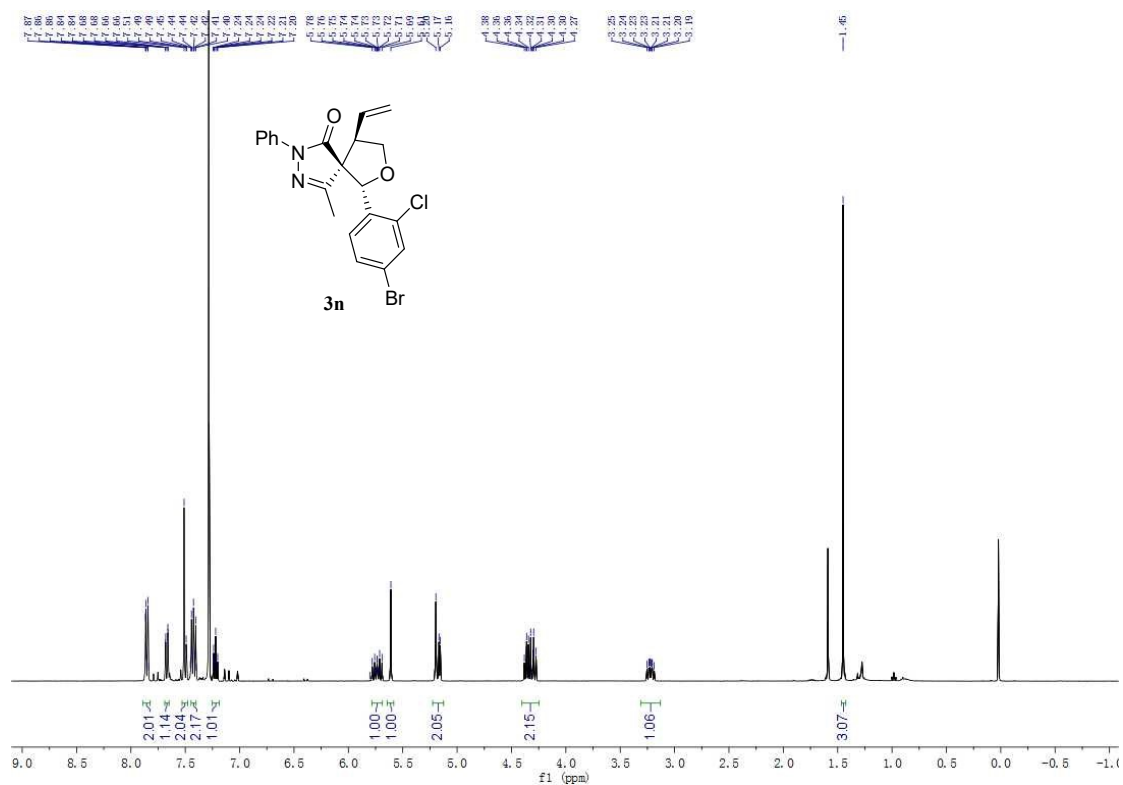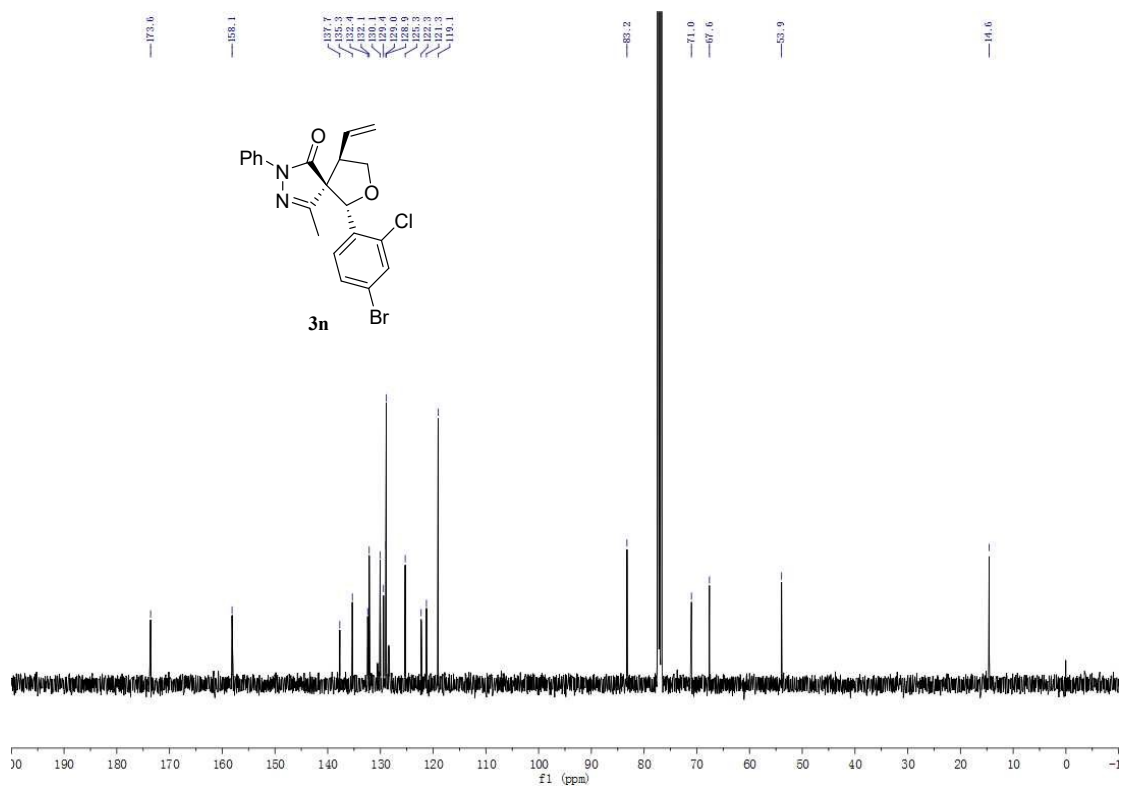

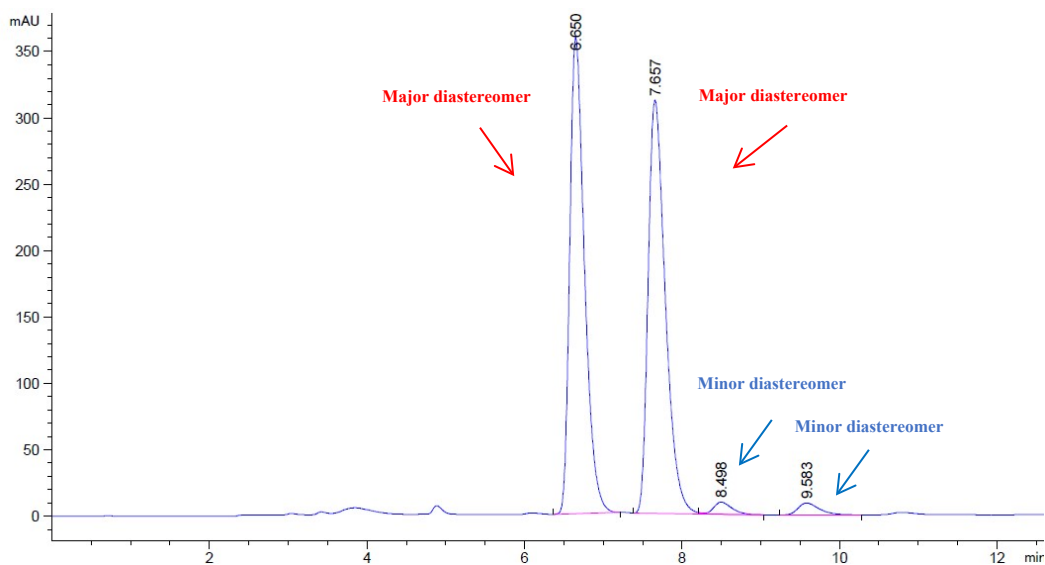

| Peak # | RetTime [min] | Type | Width [min] | Area [mAU*s] | Height [mAU] | Area %  |
|--------|---------------|------|-------------|--------------|--------------|---------|
| 1      | 6.650         | BB   | 0.1978      | 4674.19238   | 359.20905    | 48.1785 |
| 2      | 7.657         | BV R | 0.2316      | 4719.32959   | 311.72672    | 48.6438 |
| 3      | 8.498         | VB E | 0.2402      | 143.49341    | 9.13688      | 1.4790  |
| 4      | 9.583         | BB   | 0.2788      | 164.79727    | 8.95108      | 1.6986  |

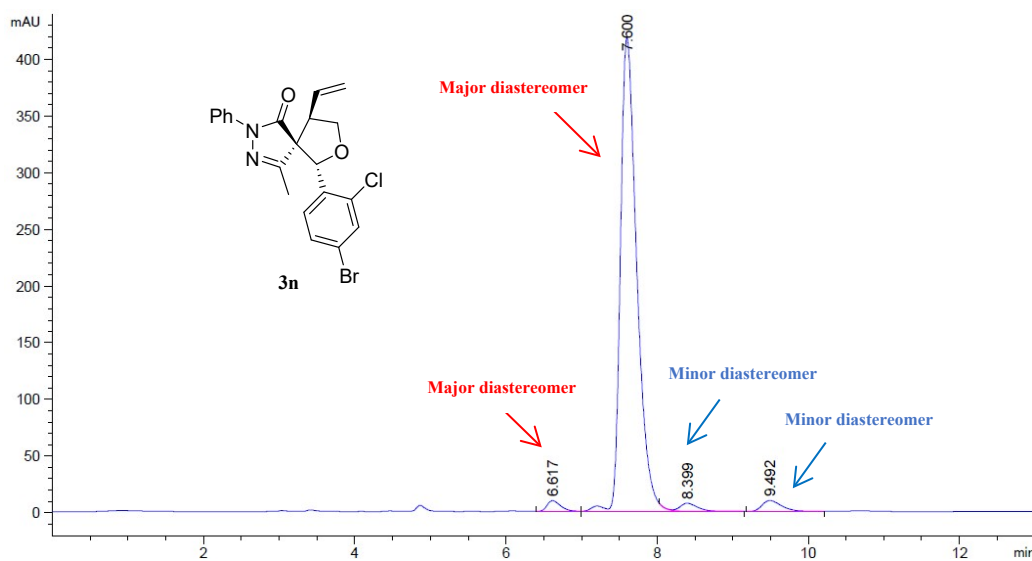

| Peak # | RetTime [min] | Type | Width [min] | Area [mAU*s] | Height [mAU] | Area %  |
|--------|---------------|------|-------------|--------------|--------------|---------|
| 1      | 6.617         | BB   | 0.1884      | 116.07354    | 9.44260      | 1.7336  |
| 2      | 7.600         | VV R | 0.2280      | 6287.54492   | 417.85553    | 93.9050 |
| 3      | 8.399         | VB E | 0.2476      | 117.47029    | 7.15135      | 1.7544  |
| 4      | 9.492         | BB   | 0.2741      | 174.55421    | 9.69430      | 2.6070  |

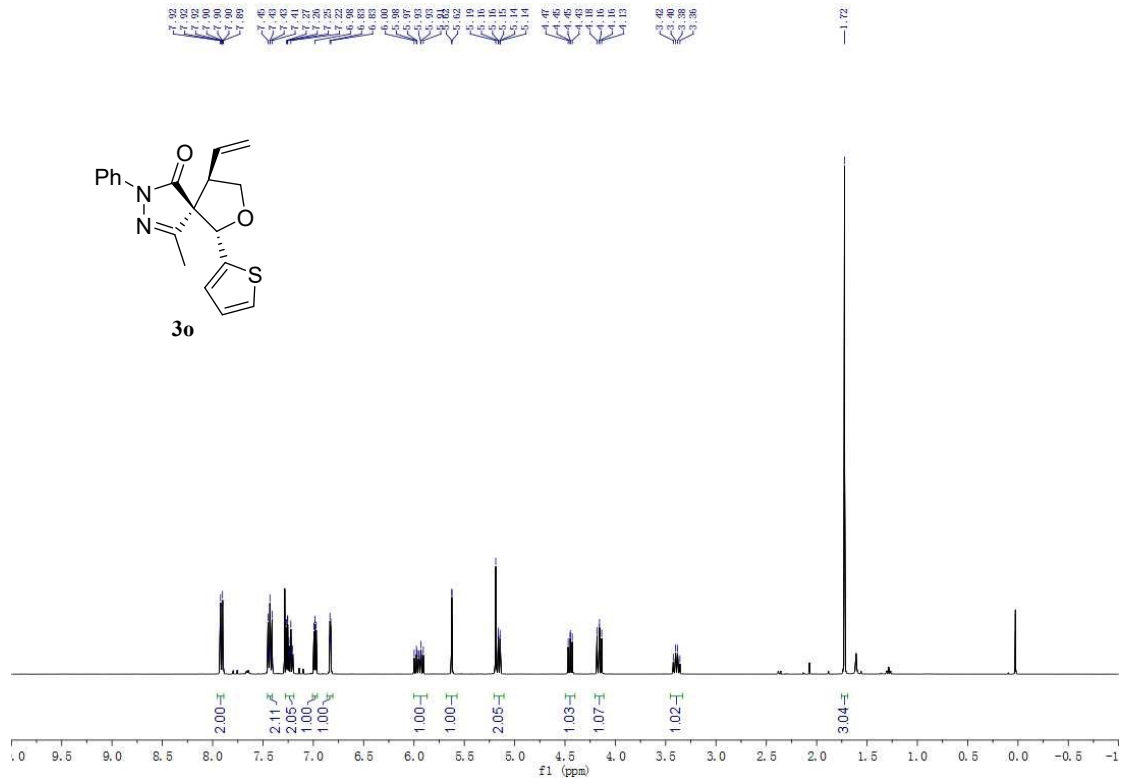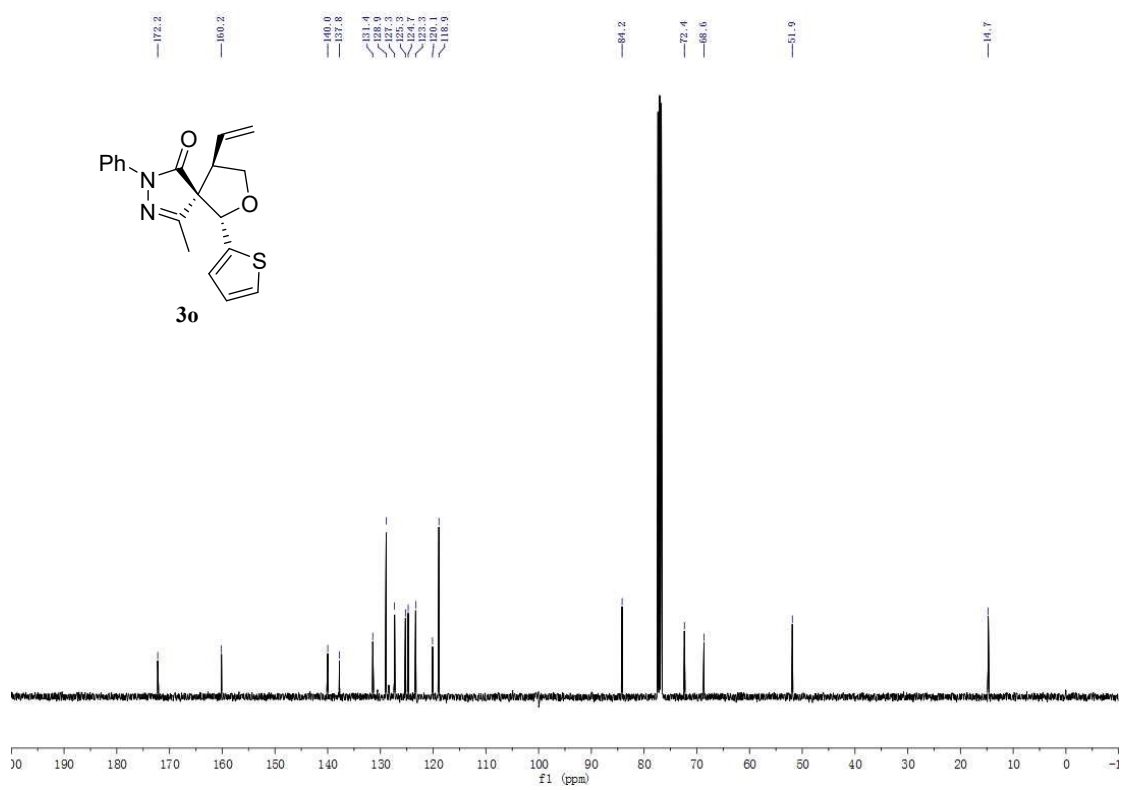

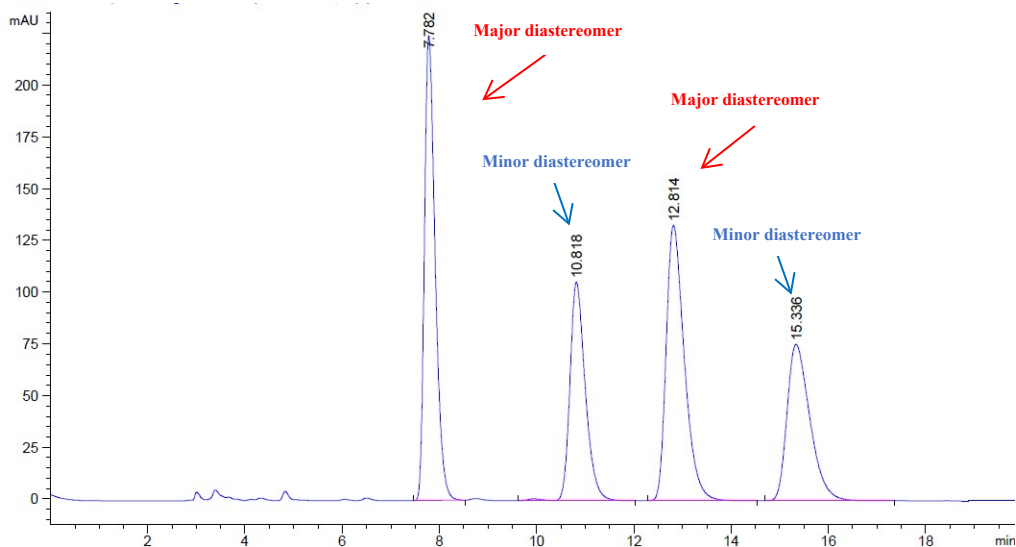

| Peak # | RetTime [min] | Type | Width [min] | Area [mAU*s] | Height [mAU] | Area %  |
|--------|---------------|------|-------------|--------------|--------------|---------|
| 1      | 7.782         | BB   | 0.2337      | 3440.80298   | 224.68813    | 29.4824 |
| 2      | 10.818        | VB R | 0.3325      | 2320.58179   | 105.56754    | 19.8838 |
| 3      | 12.814        | BB   | 0.3951      | 3443.92358   | 133.00270    | 29.5091 |
| 4      | 15.336        | BB   | 0.5017      | 2465.41040   | 75.54914     | 21.1248 |

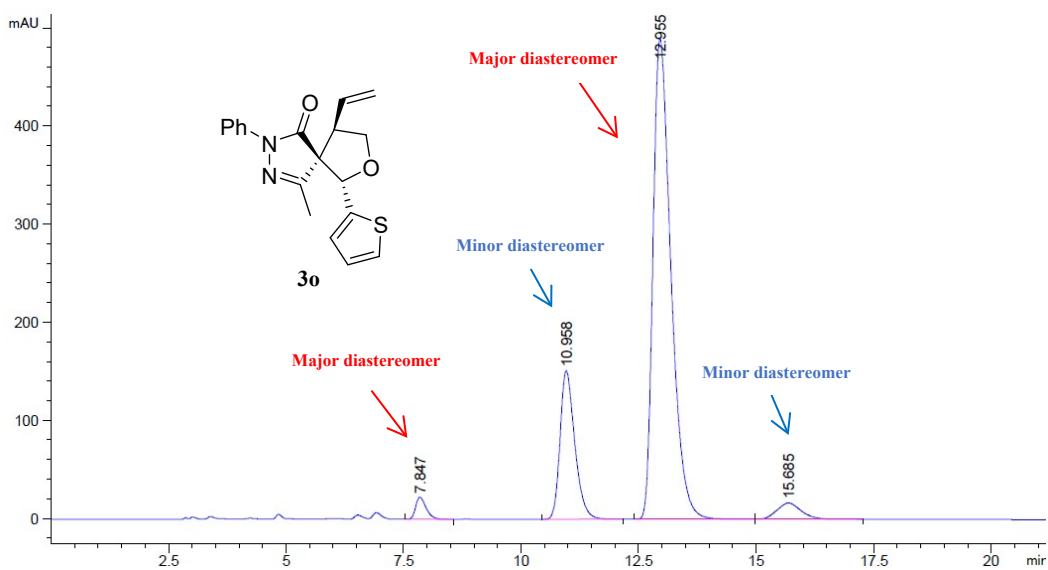

| Peak # | RetTime [min] | Type | Width [min] | Area [mAU*s] | Height [mAU] | Area %  |
|--------|---------------|------|-------------|--------------|--------------|---------|
| 1      | 7.847         | BB   | 0.2345      | 345.95560    | 22.48843     | 2.0130  |
| 2      | 10.958        | BB   | 0.3298      | 3292.31421   | 151.33138    | 19.1565 |
| 3      | 12.955        | BB   | 0.4038      | 1.29642e4    | 489.83395    | 75.4329 |
| 4      | 15.685        | BB   | 0.5350      | 583.94543    | 16.45460     | 3.3977  |

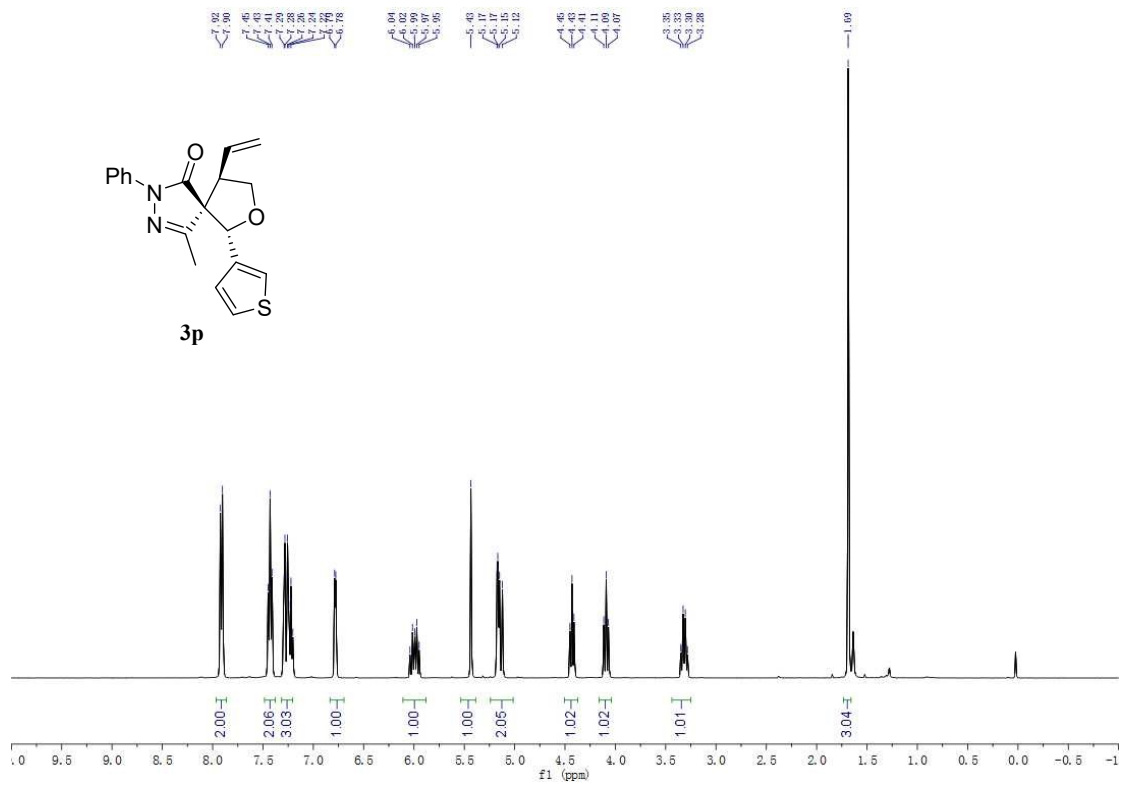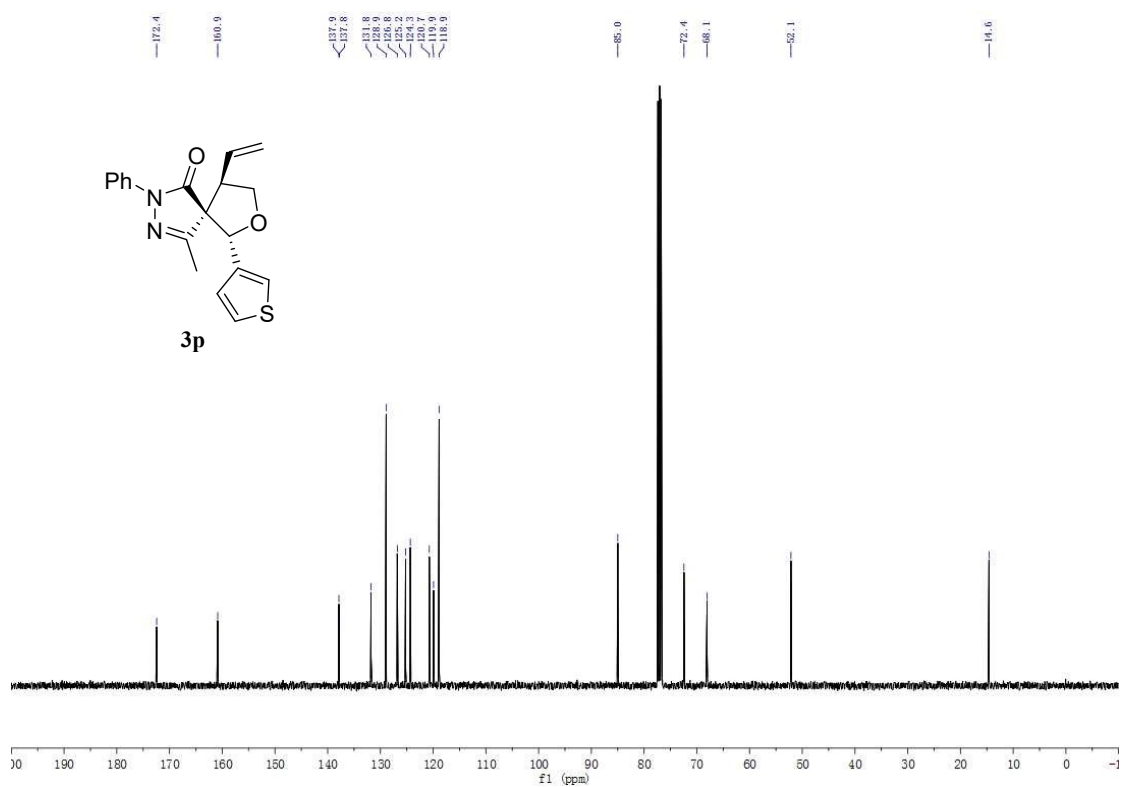



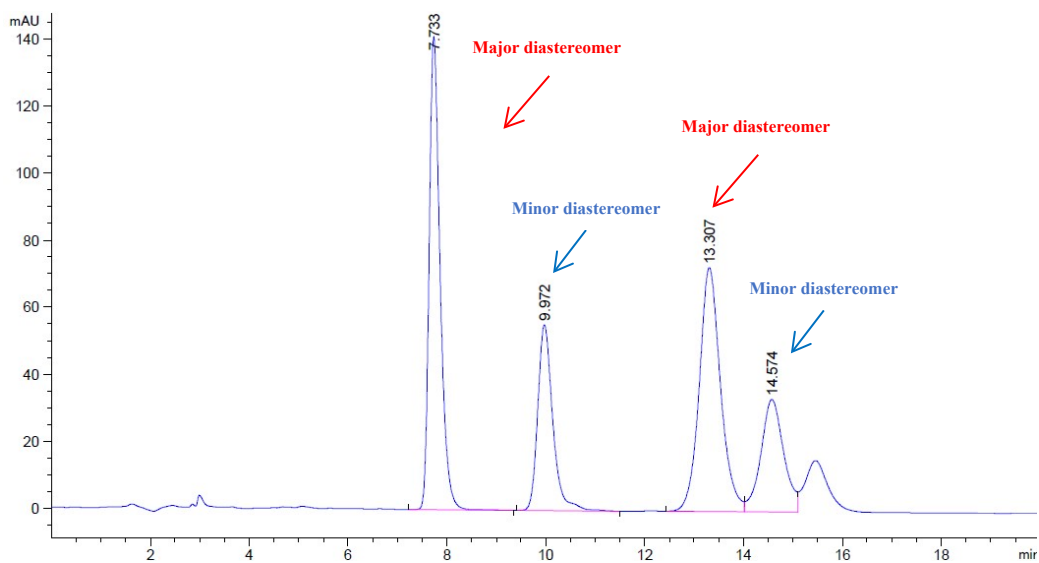

| Peak # | RetTime [min] | Type | Width [min] | Area [mAU*s] | Height [mAU] | Area %  |
|--------|---------------|------|-------------|--------------|--------------|---------|
| 1      | 7.733         | BB   | 0.2325      | 2169.93628   | 141.02448    | 32.9265 |
| 2      | 9.972         | BB   | 0.3198      | 1172.89709   | 55.43604     | 17.7975 |
| 3      | 13.307        | BV   | 0.4476      | 2172.80225   | 72.71928     | 32.9700 |
| 4      | 14.574        | VV   | 0.4798      | 1074.60742   | 33.53859     | 16.3060 |

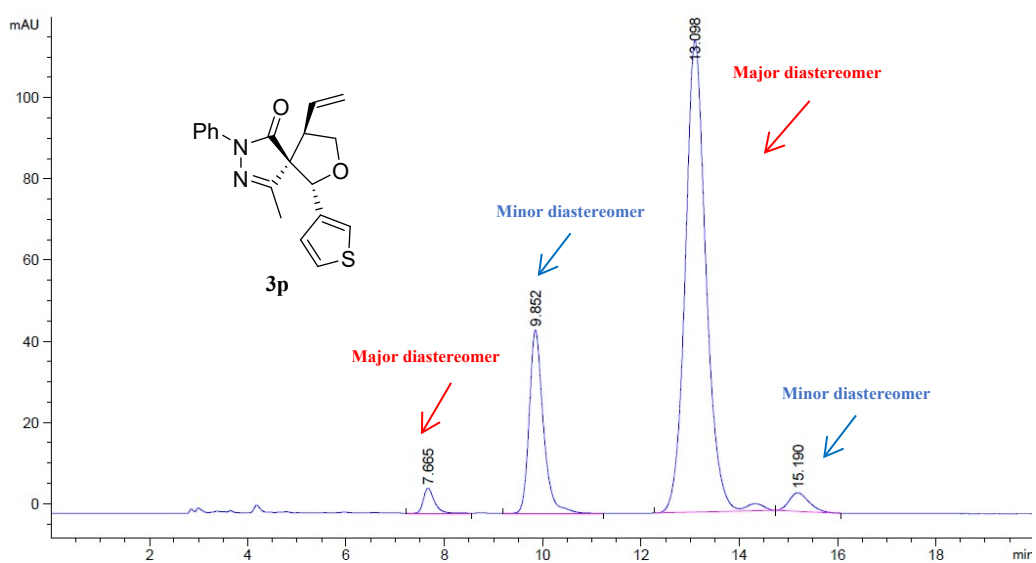

| Peak # | RetTime [min] | Type | Width [min] | Area [mAU*s] | Height [mAU] | Area %  |
|--------|---------------|------|-------------|--------------|--------------|---------|
| 1      | 7.665         | BB   | 0.2321      | 96.15626     | 6.19369      | 2.1098  |
| 2      | 9.852         | BB   | 0.2987      | 900.67169    | 45.16088     | 19.7621 |
| 3      | 13.098        | BV R | 0.4406      | 3432.49585   | 116.15692    | 75.3141 |
| 4      | 15.190        | BB   | 0.4173      | 128.25304    | 4.58601      | 2.8141  |

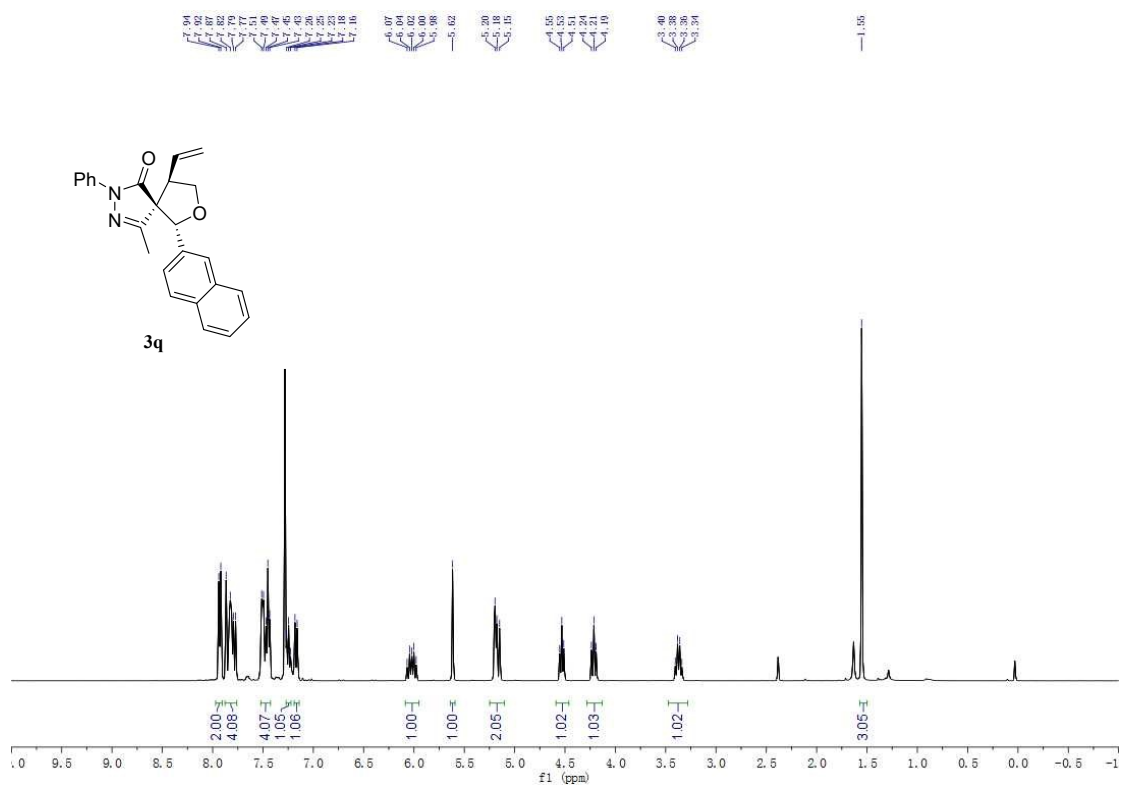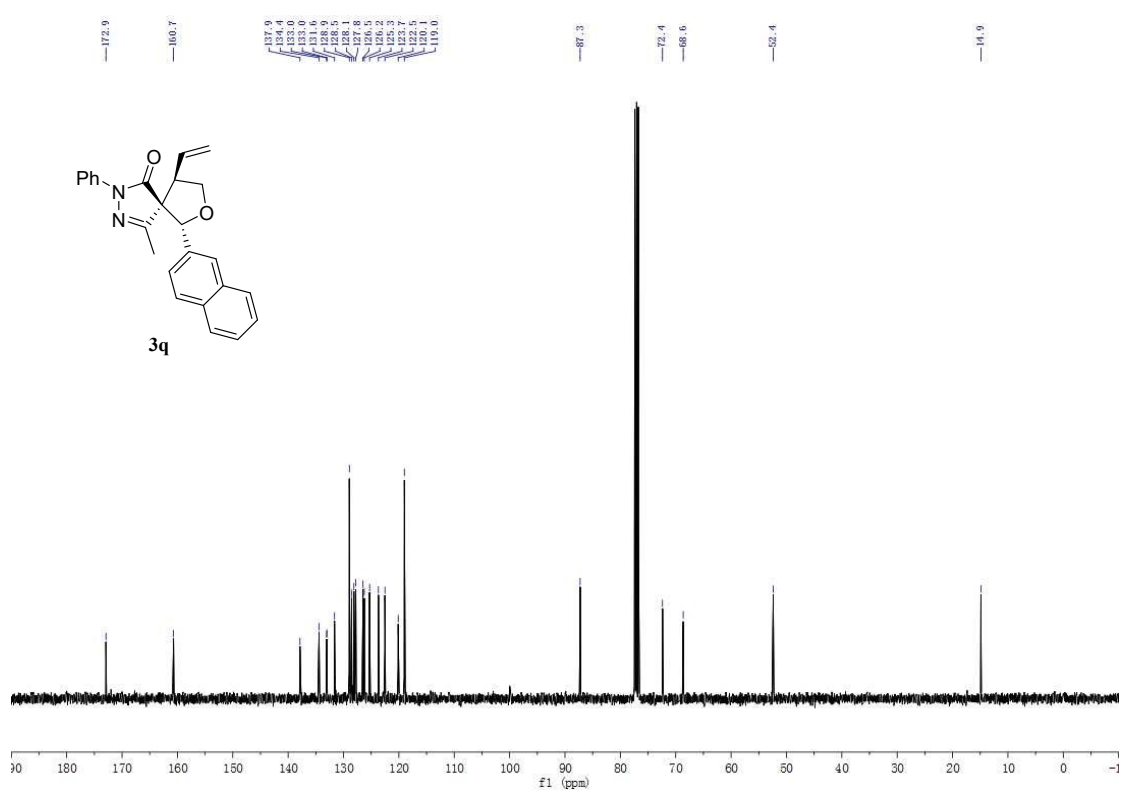

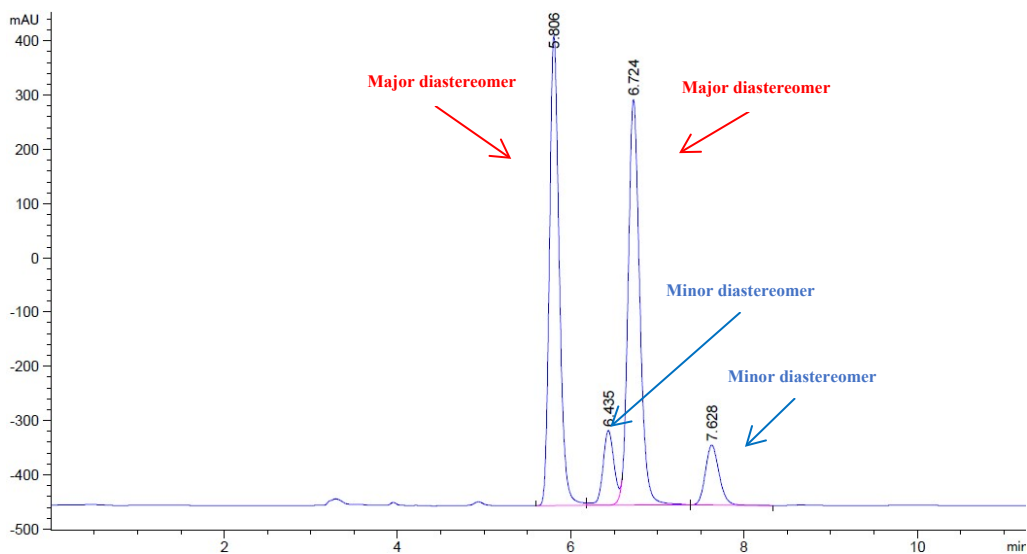

| Peak # | RetTime [min] | Type | Width [min] | Area [mAU*s] | Height [mAU] | Area %  |
|--------|---------------|------|-------------|--------------|--------------|---------|
| 1      | 5.806         | BV   | 0.1207      | 6808.12158   | 866.34723    | 41.9060 |
| 2      | 6.435         | VV E | 0.1351      | 1206.46399   | 137.90697    | 7.4261  |
| 3      | 6.724         | VB R | 0.1435      | 7016.41699   | 747.70532    | 43.1882 |
| 4      | 7.628         | BB   | 0.1705      | 1215.15698   | 110.34270    | 7.4797  |

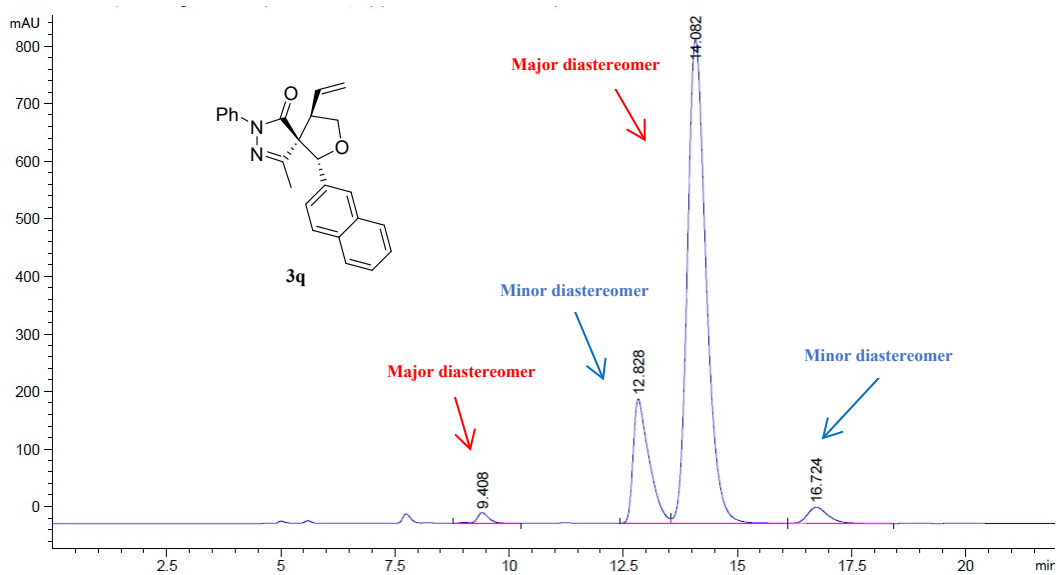

| Peak # | RetTime [min] | Type | Width [min] | Area [mAU*s] | Height [mAU] | Area %  |
|--------|---------------|------|-------------|--------------|--------------|---------|
| 1      | 9.408         | VB R | 0.2574      | 335.31424    | 18.48689     | 1.1073  |
| 2      | 12.828        | BV   | 0.3460      | 5225.16064   | 215.43951    | 17.2552 |
| 3      | 14.082        | VB   | 0.4330      | 2.38420e4    | 840.40344    | 78.7343 |
| 4      | 16.724        | BB   | 0.4704      | 879.12665    | 28.07169     | 2.9032  |

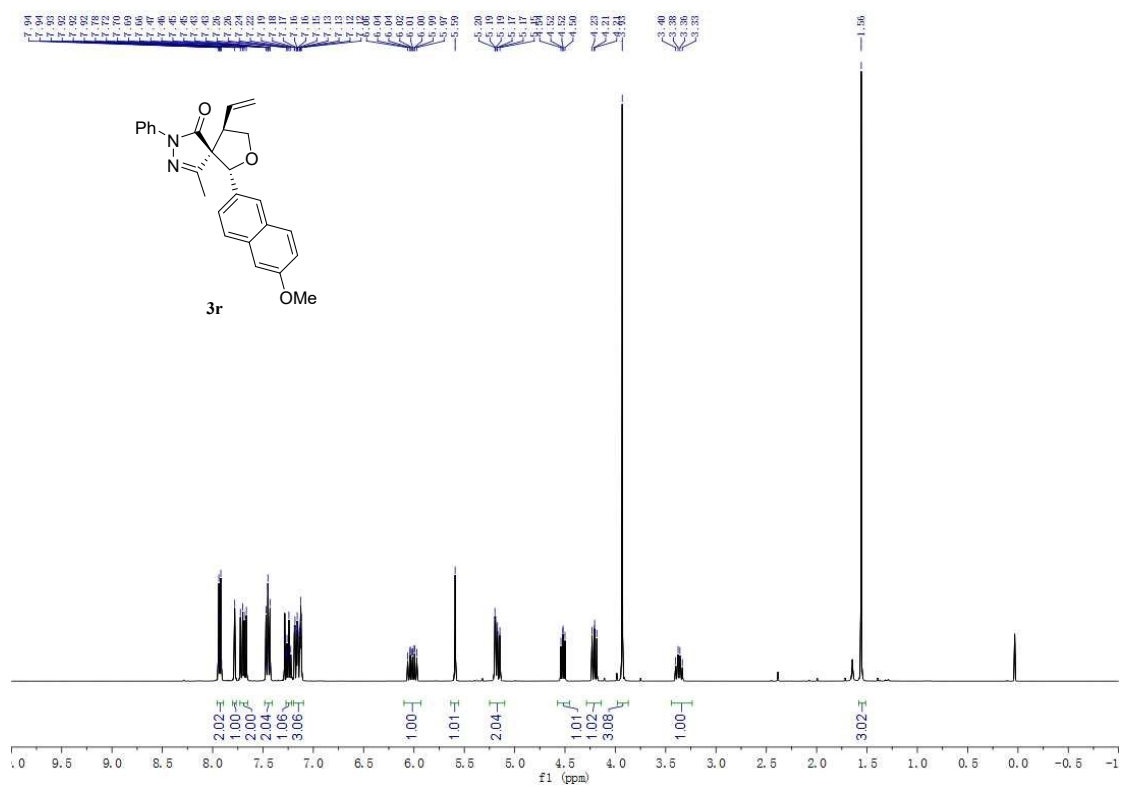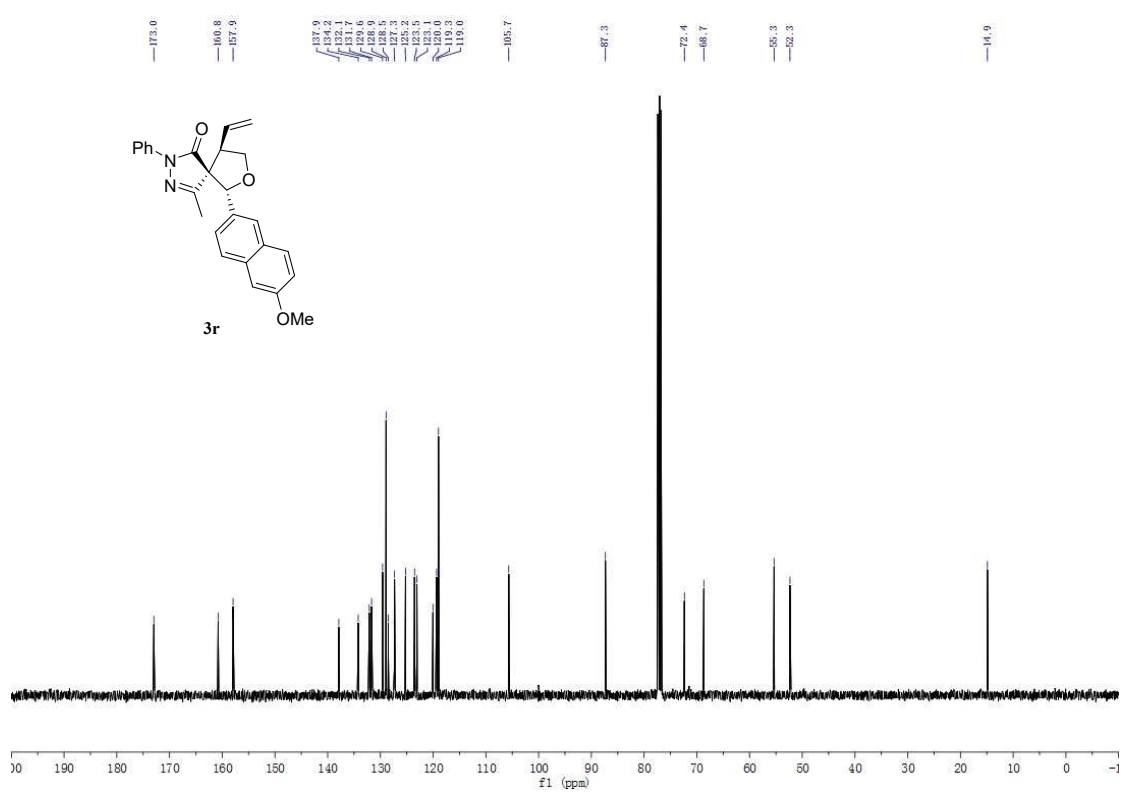

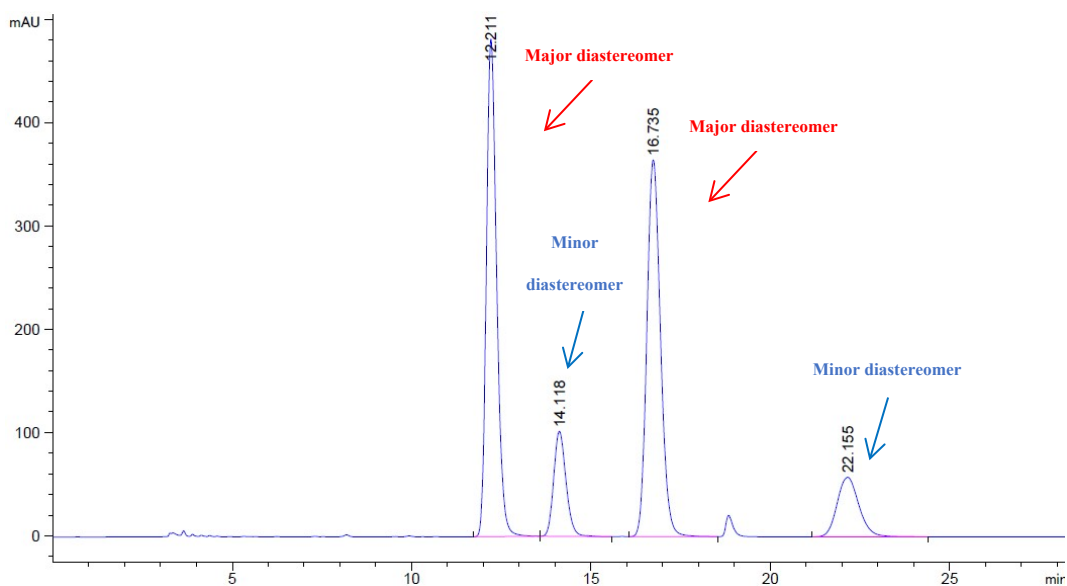

| Peak # | RetTime [min] | Type | Width [min] | Area [mAU*s] | Height [mAU] | Area %  |
|--------|---------------|------|-------------|--------------|--------------|---------|
| 1      | 12.211        | BB   | 0.3055      | 9558.79199   | 481.74152    | 39.7659 |
| 2      | 14.118        | BB   | 0.3691      | 2433.08545   | 101.70821    | 10.1220 |
| 3      | 16.735        | BB   | 0.4083      | 9613.46680   | 364.96213    | 39.9934 |
| 4      | 22.155        | BB   | 0.6584      | 2432.28662   | 57.63498     | 10.1187 |

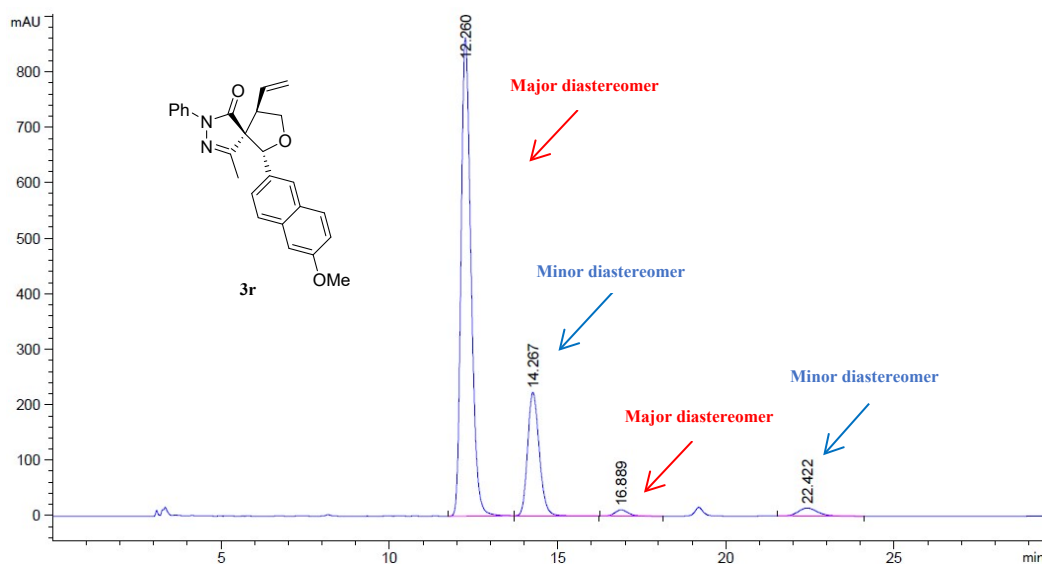

| Peak # | RetTime [min] | Type | Width [min] | Area [mAU*s] | Height [mAU] | Area %  |
|--------|---------------|------|-------------|--------------|--------------|---------|
| 1      | 12.260        | BB   | 0.3162      | 1.76638e4    | 861.63062    | 73.9421 |
| 2      | 14.267        | BB   | 0.3695      | 5335.29248   | 222.67987    | 22.3339 |
| 3      | 16.889        | BB   | 0.4204      | 305.70959    | 11.16817     | 1.2797  |
| 4      | 22.422        | BB   | 0.6141      | 583.89417    | 14.49125     | 2.4442  |

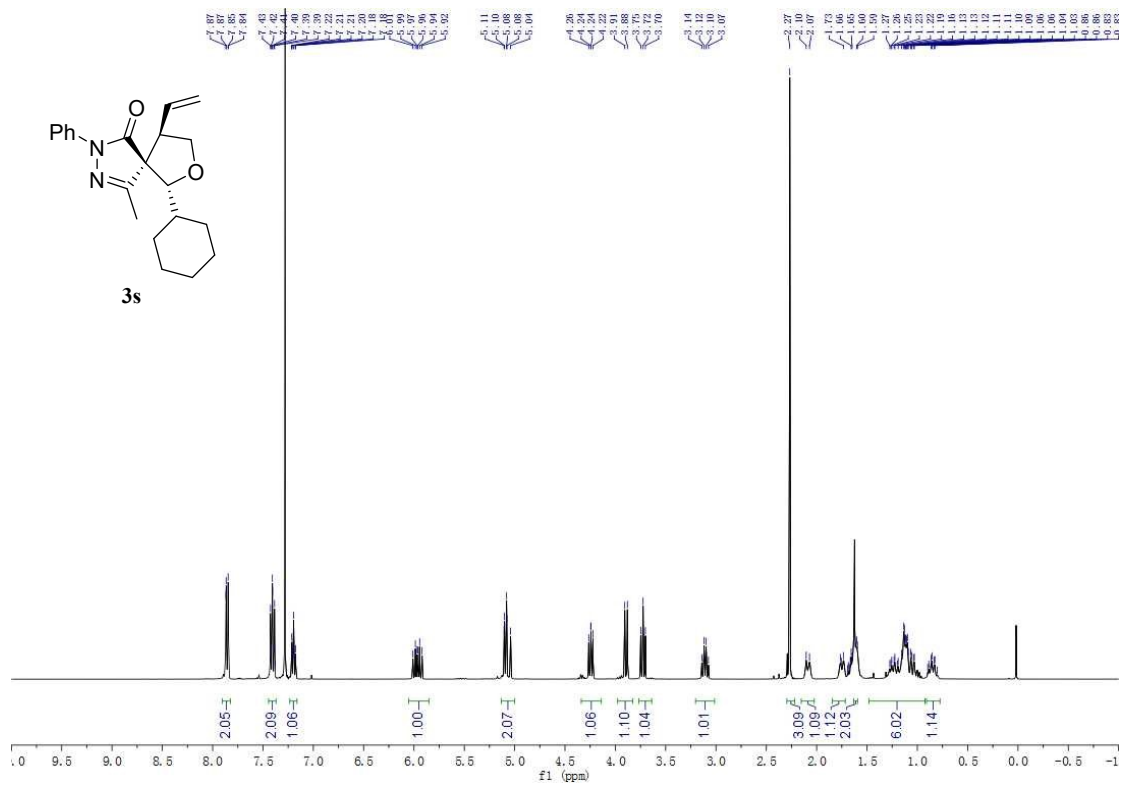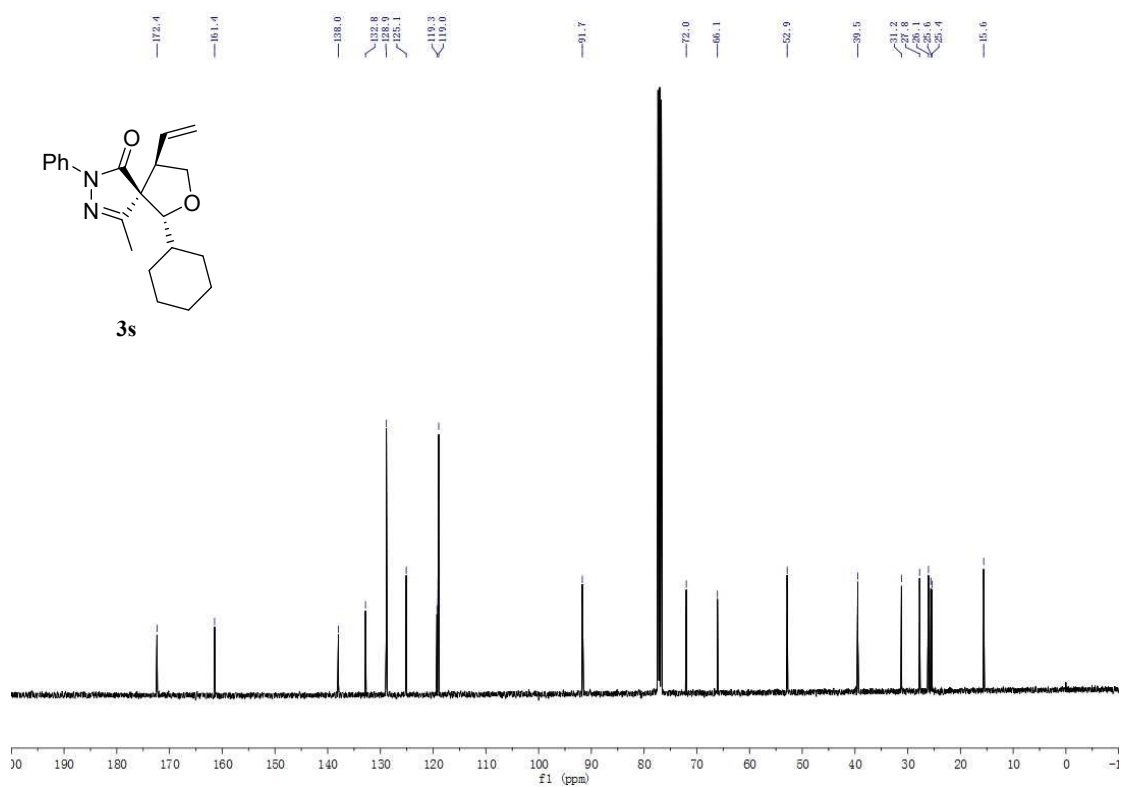

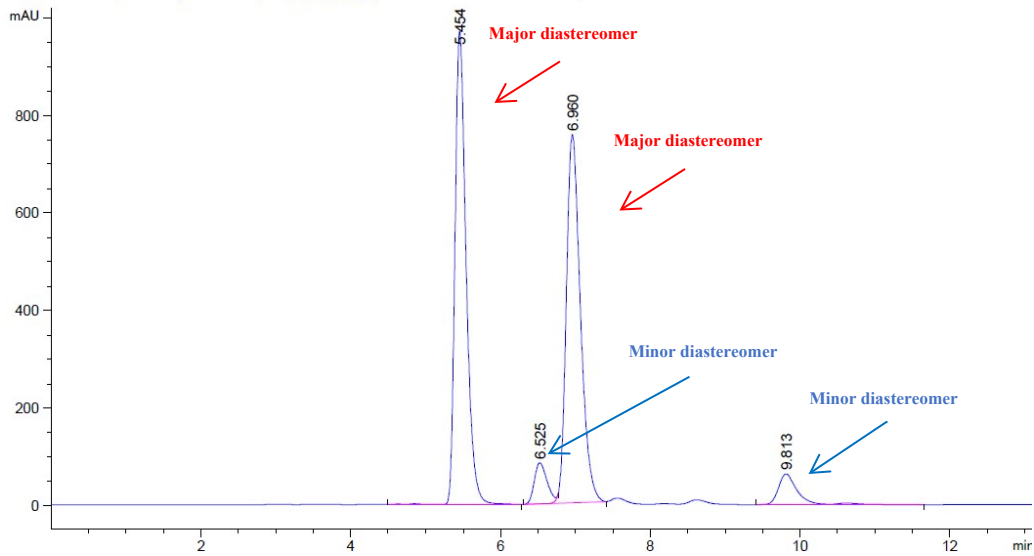

| Peak # | RetTime [min] | Type | Width [min] | Area [mAU*s] | Height [mAU] | Area %  |
|--------|---------------|------|-------------|--------------|--------------|---------|
| 1      | 5.454         | VB R | 0.1575      | 1.00008e4    | 968.51599    | 45.4605 |
| 2      | 6.525         | BV E | 0.1803      | 982.32611    | 84.07376     | 4.4653  |
| 3      | 6.960         | VB R | 0.2009      | 9884.17383   | 754.42230    | 44.9303 |
| 4      | 9.813         | BV R | 0.2526      | 1131.60608   | 62.97055     | 5.1439  |

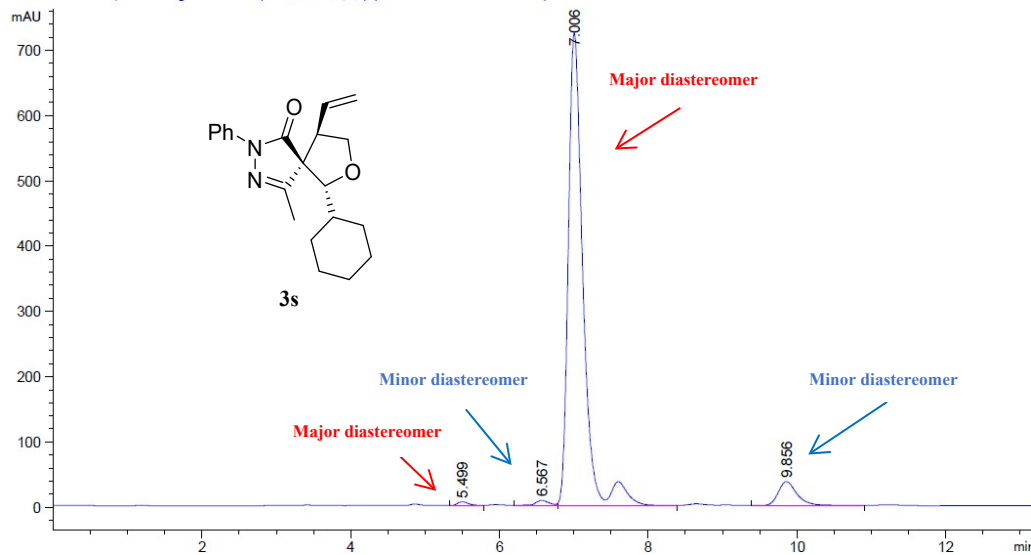

| Peak # | RetTime [min] | Type | Width [min] | Area [mAU*s] | Height [mAU] | Area %  |
|--------|---------------|------|-------------|--------------|--------------|---------|
| 1      | 5.499         | BV   | 0.1537      | 59.34518     | 5.93371      | 0.5474  |
| 2      | 6.567         | BV E | 0.1870      | 95.41780     | 7.78400      | 0.8801  |
| 3      | 7.006         | VV R | 0.2000      | 1.00379e4    | 724.26819    | 92.5849 |
| 4      | 9.856         | BB   | 0.2648      | 649.16400    | 36.79922     | 5.9876  |

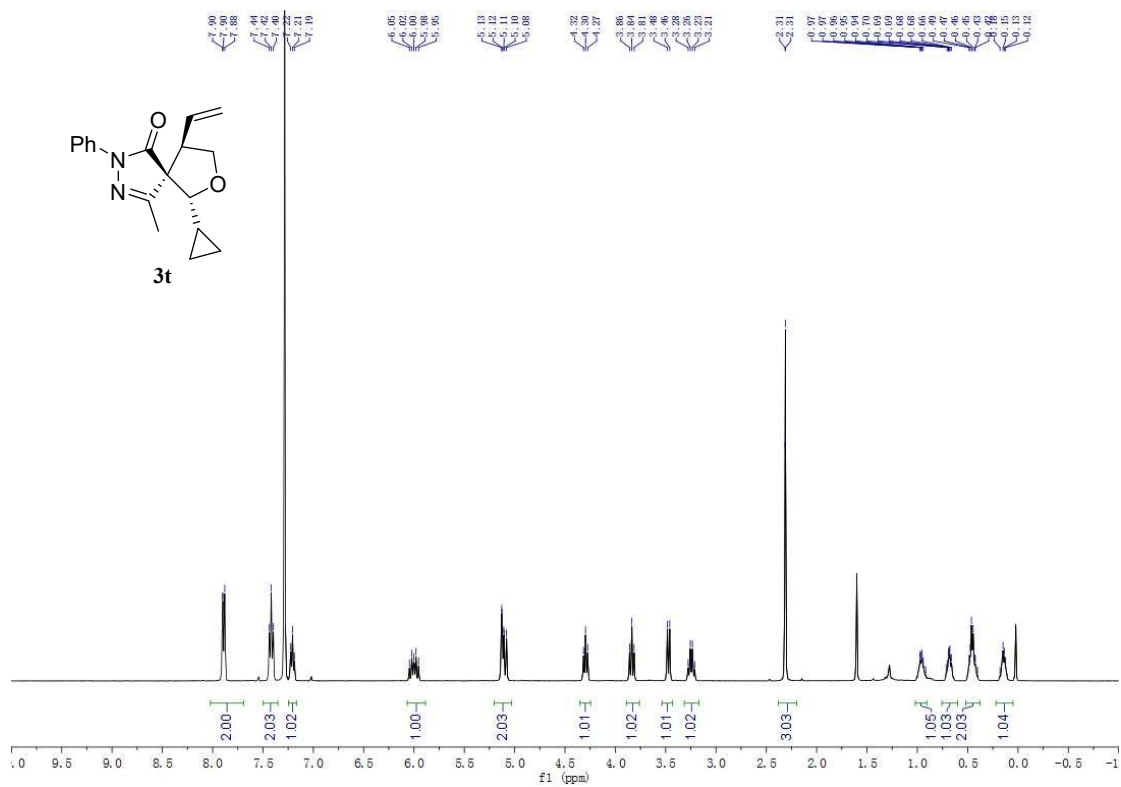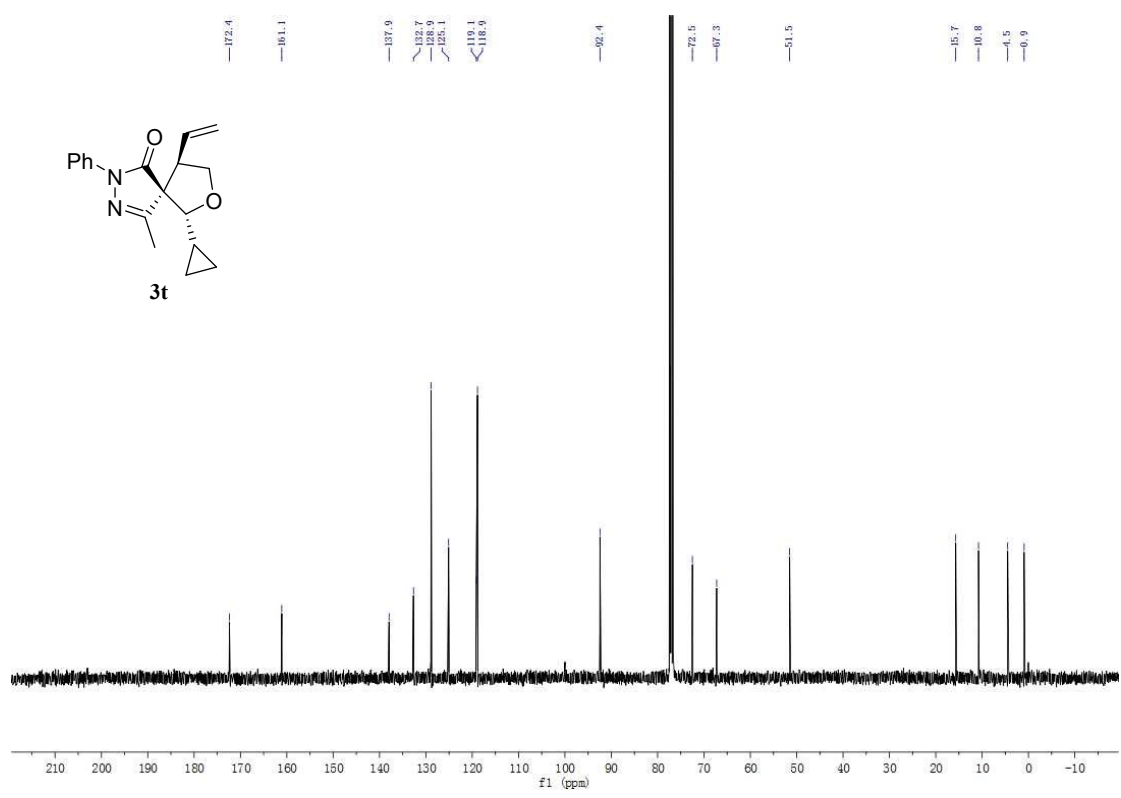



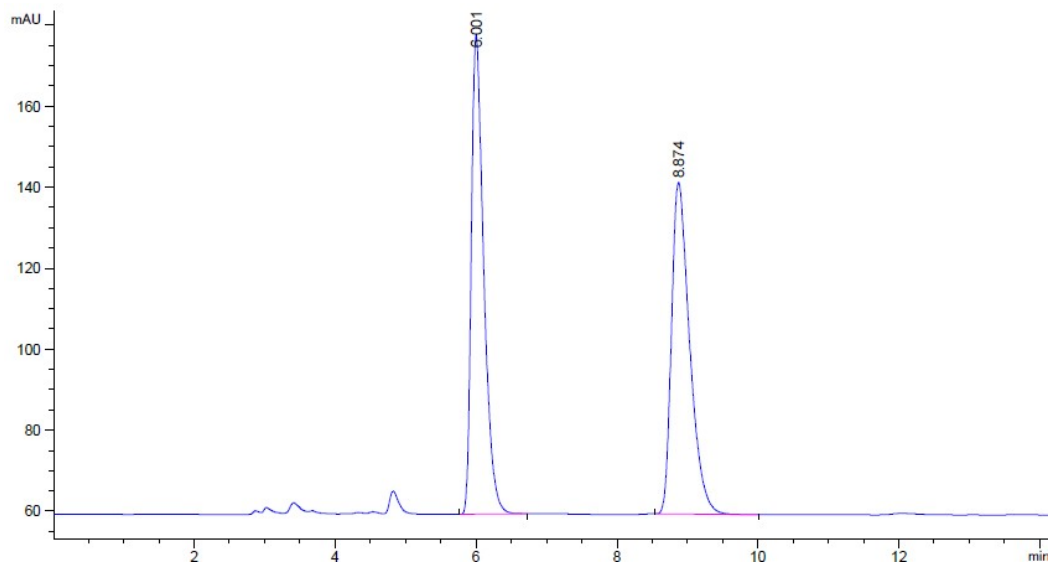

| Peak # | RetTime [min] | Type | Width [min] | Area [mAU*s] | Height [mAU] | Area %  |
|--------|---------------|------|-------------|--------------|--------------|---------|
| 1      | 6.001         | BB   | 0.1837      | 1447.63599   | 118.35202    | 49.7124 |
| 2      | 8.874         | BB   | 0.2696      | 1464.38867   | 81.90359     | 50.2876 |

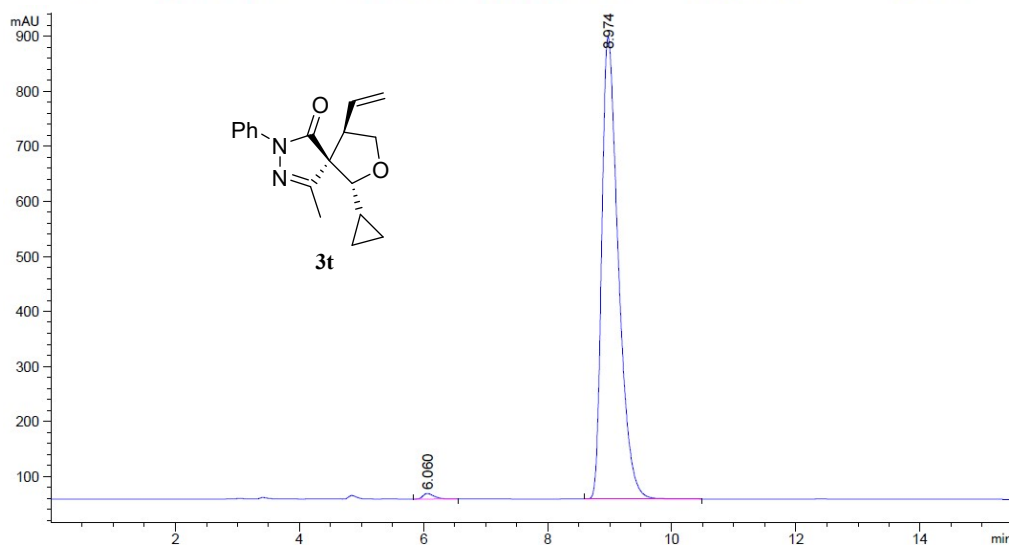

| Peak # | RetTime [min] | Type | Width [min] | Area [mAU*s] | Height [mAU] | Area %  |
|--------|---------------|------|-------------|--------------|--------------|---------|
| 1      | 6.060         | BB   | 0.1899      | 125.26244    | 10.01338     | 0.8006  |
| 2      | 8.974         | BB   | 0.2794      | 1.55214e4    | 840.50482    | 99.1994 |

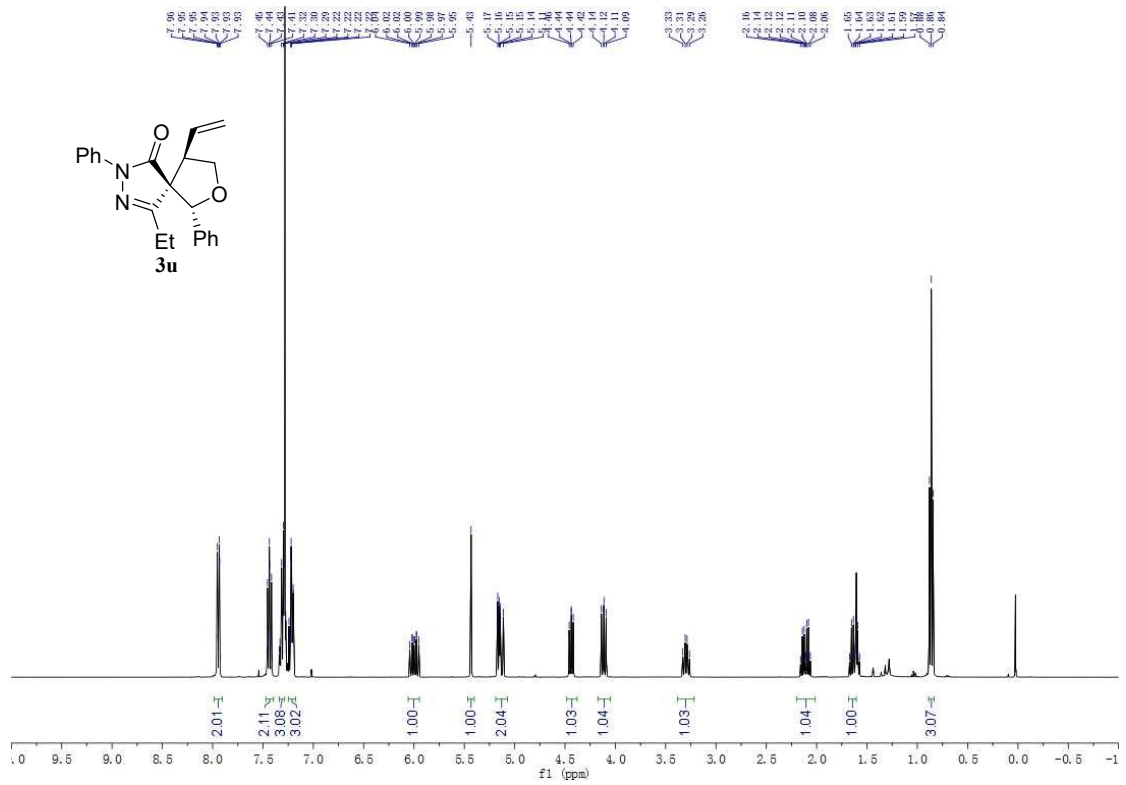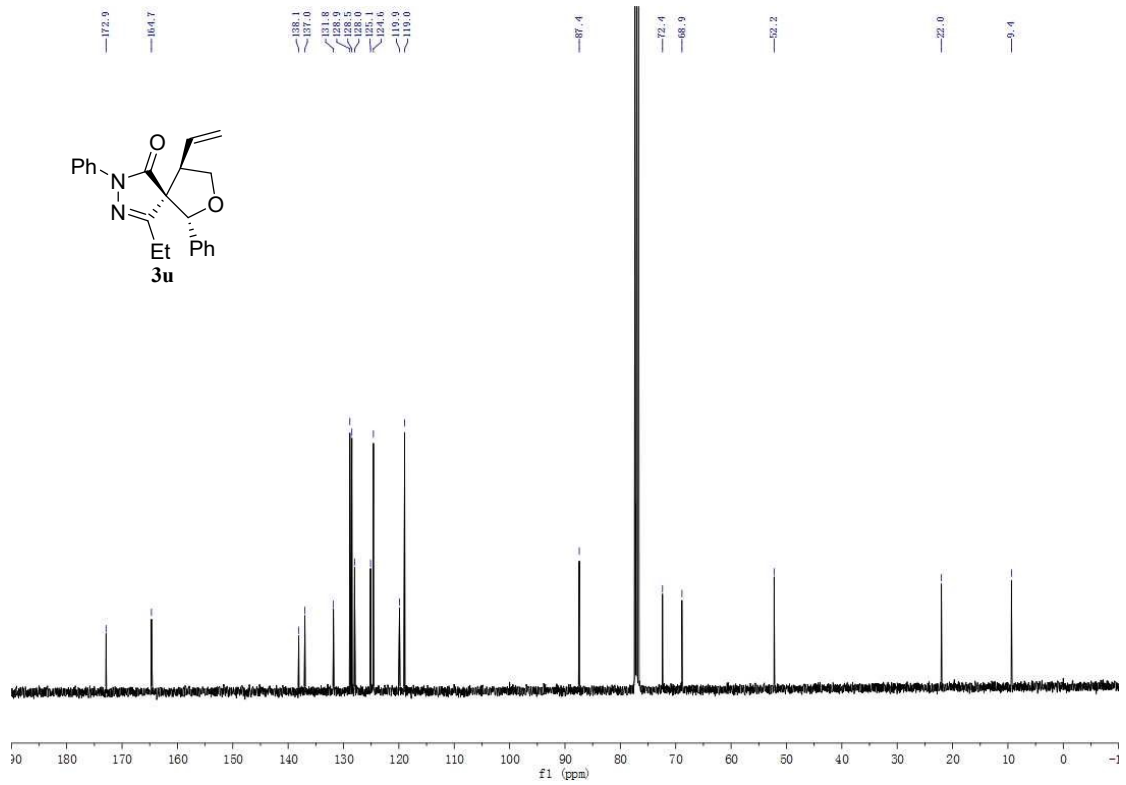

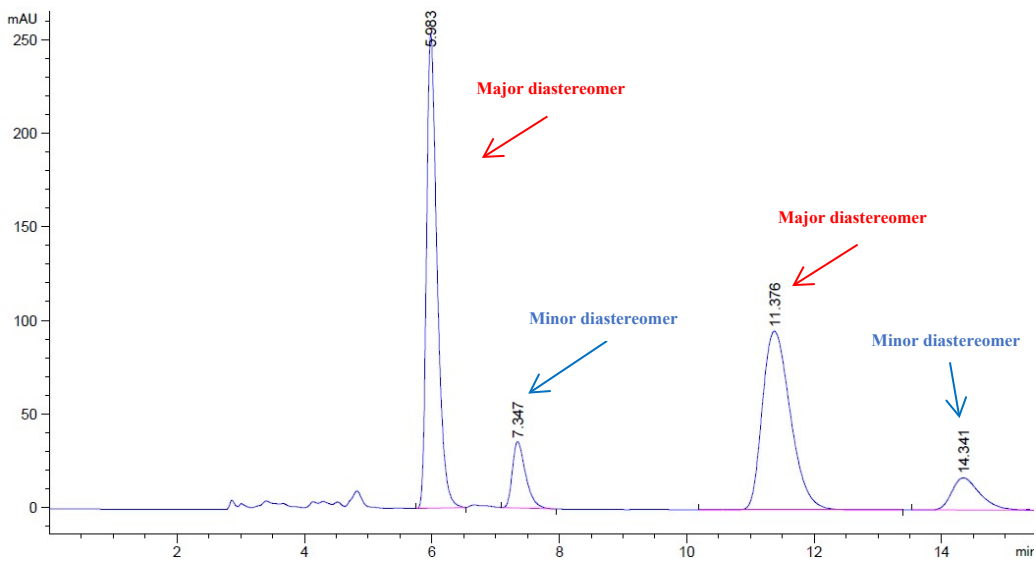

| Peak # | RetTime [min] | Type | Width [min] | Area [mAU*s] | Height [mAU] | Area %  |
|--------|---------------|------|-------------|--------------|--------------|---------|
| 1      | 5.983         | BB   | 0.1754      | 2934.96265   | 252.81757    | 42.5867 |
| 2      | 7.347         | BB   | 0.2165      | 510.68759    | 35.36918     | 7.4101  |
| 3      | 11.376        | VB R | 0.4804      | 2916.62012   | 95.43499     | 42.3205 |
| 4      | 14.341        | BBA  | 0.4664      | 529.46680    | 17.23672     | 7.6826  |

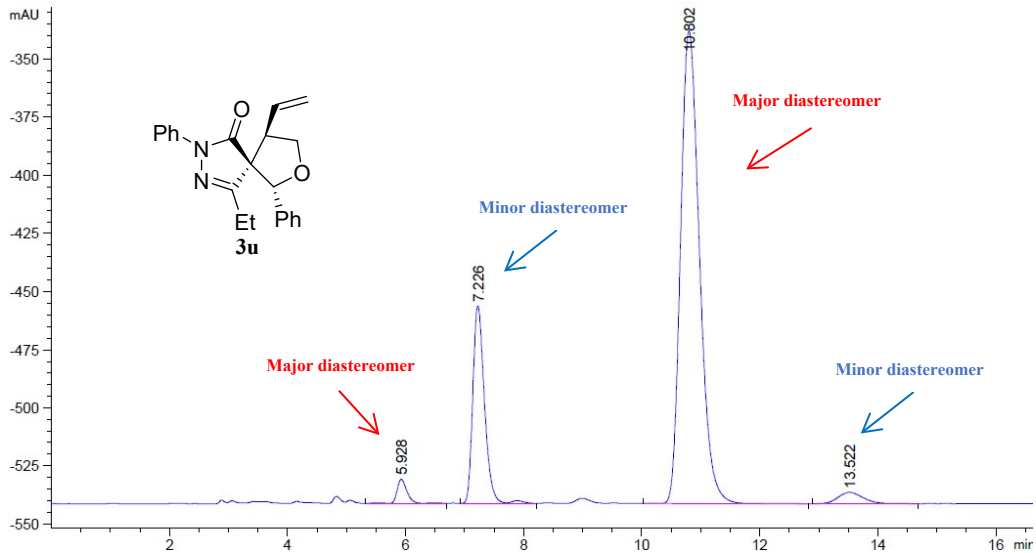

| Peak # | RetTime [min] | Type | Width [min] | Area [mAU*s] | Height [mAU] | Area %  |
|--------|---------------|------|-------------|--------------|--------------|---------|
| 1      | 5.928         | VV R | 0.1746      | 119.88450    | 10.34484     | 2.0192  |
| 2      | 7.226         | BV R | 0.2058      | 1163.86255   | 84.82523     | 19.6031 |
| 3      | 10.802        | BV R | 0.3467      | 4509.91992   | 203.19647    | 75.9611 |
| 4      | 13.522        | BB   | 0.4568      | 143.47853    | 4.85515      | 2.4166  |

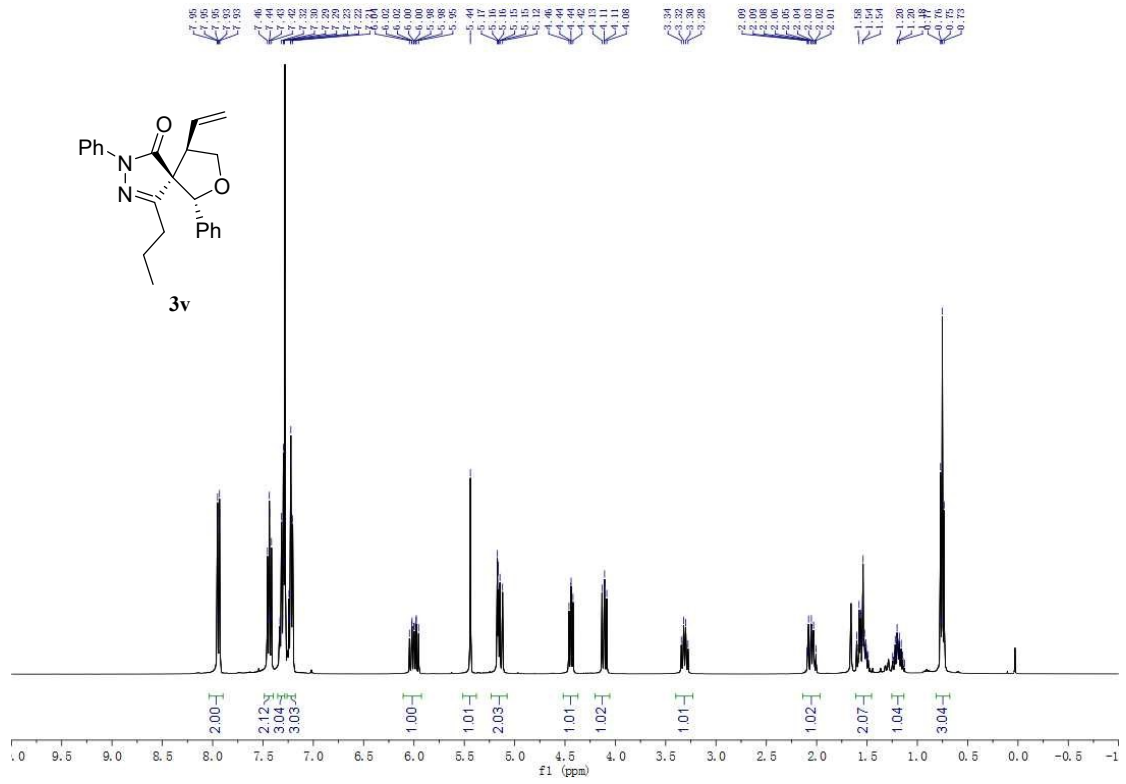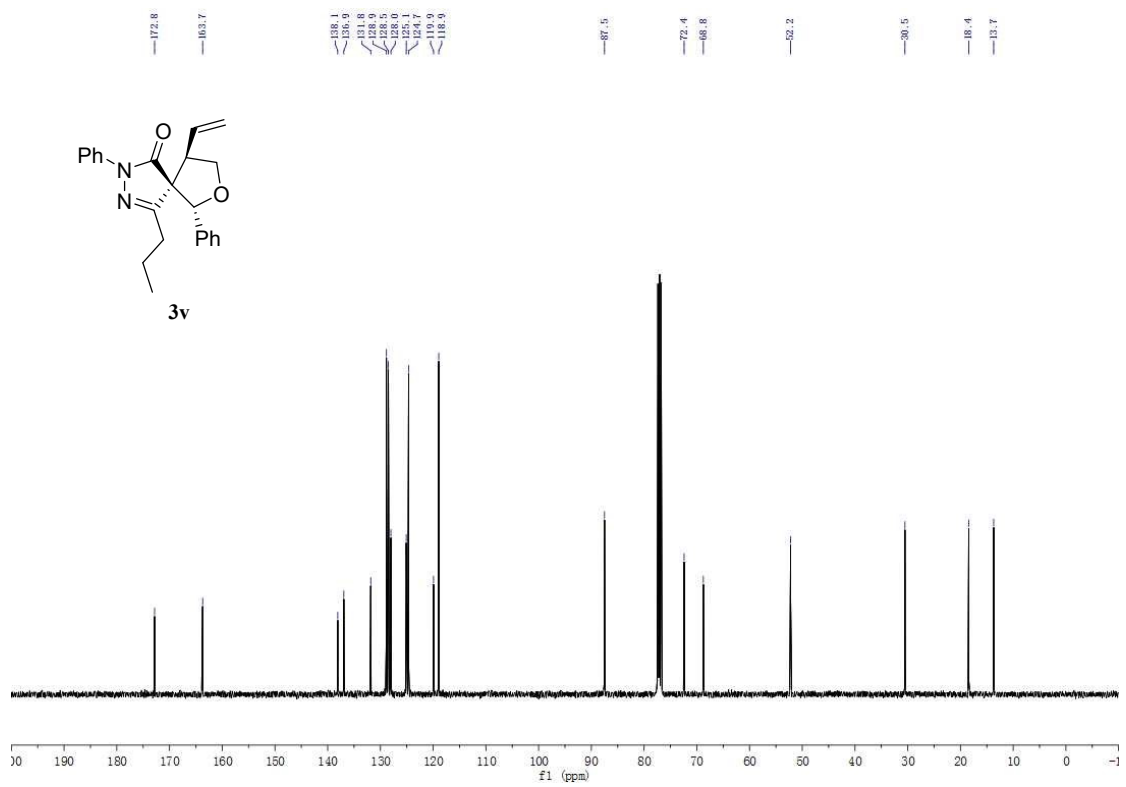

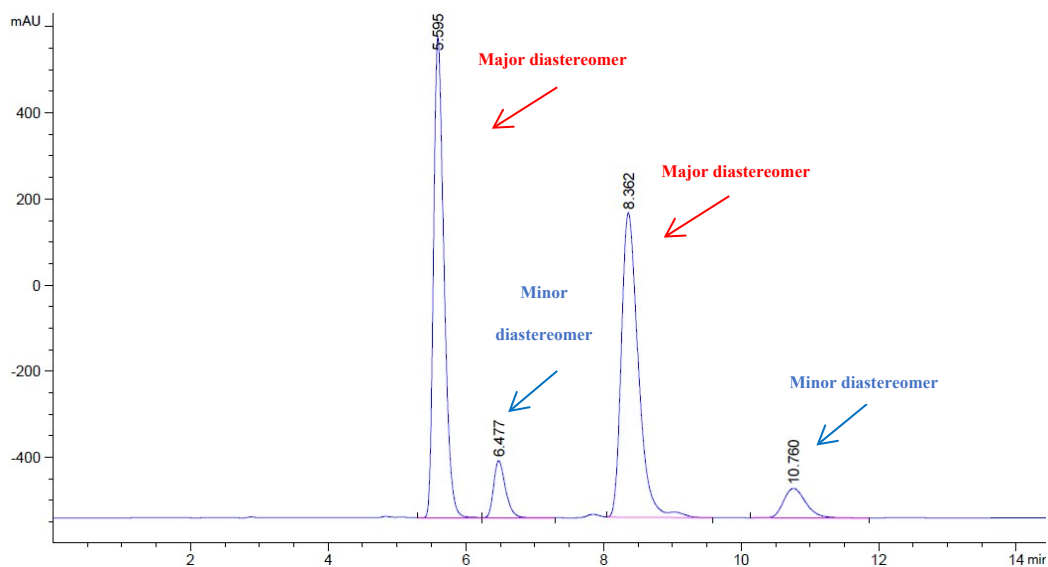

| Peak # | RetTime [min] | Type | Width [min] | Area [mAU*s] | Height [mAU] | Area %  |
|--------|---------------|------|-------------|--------------|--------------|---------|
| 1      | 5.595         | BV   | 0.1630      | 1.17630e4    | 1115.97266   | 43.5022 |
| 2      | 6.477         | VB   | 0.1869      | 1601.42151   | 132.58990    | 5.9224  |
| 3      | 8.362         | BV R | 0.2618      | 1.21348e4    | 706.35474    | 44.8769 |
| 4      | 10.760        | BV   | 0.3498      | 1540.89233   | 68.67101     | 5.6985  |

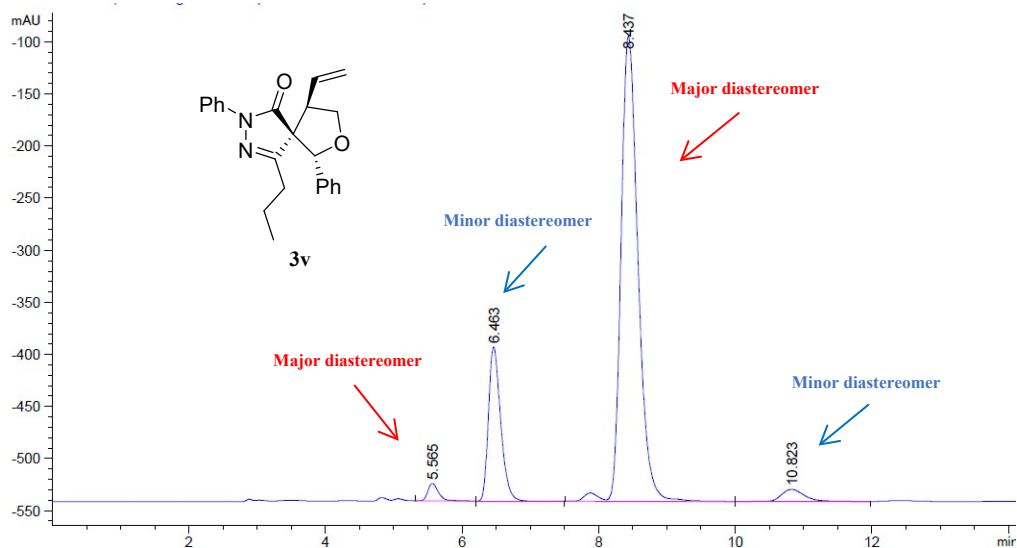

| Peak # | RetTime [min] | Type | Width [min] | Area [mAU*s] | Height [mAU] | Area %  |
|--------|---------------|------|-------------|--------------|--------------|---------|
| 1      | 5.565         | BB   | 0.1674      | 187.67735    | 16.91838     | 1.8630  |
| 2      | 6.463         | BV R | 0.1912      | 1845.10120   | 148.03413    | 18.3157 |
| 3      | 8.437         | VB R | 0.2661      | 7772.38965   | 446.45950    | 77.1538 |
| 4      | 10.823        | BV   | 0.3541      | 268.71832    | 11.60821     | 2.6675  |

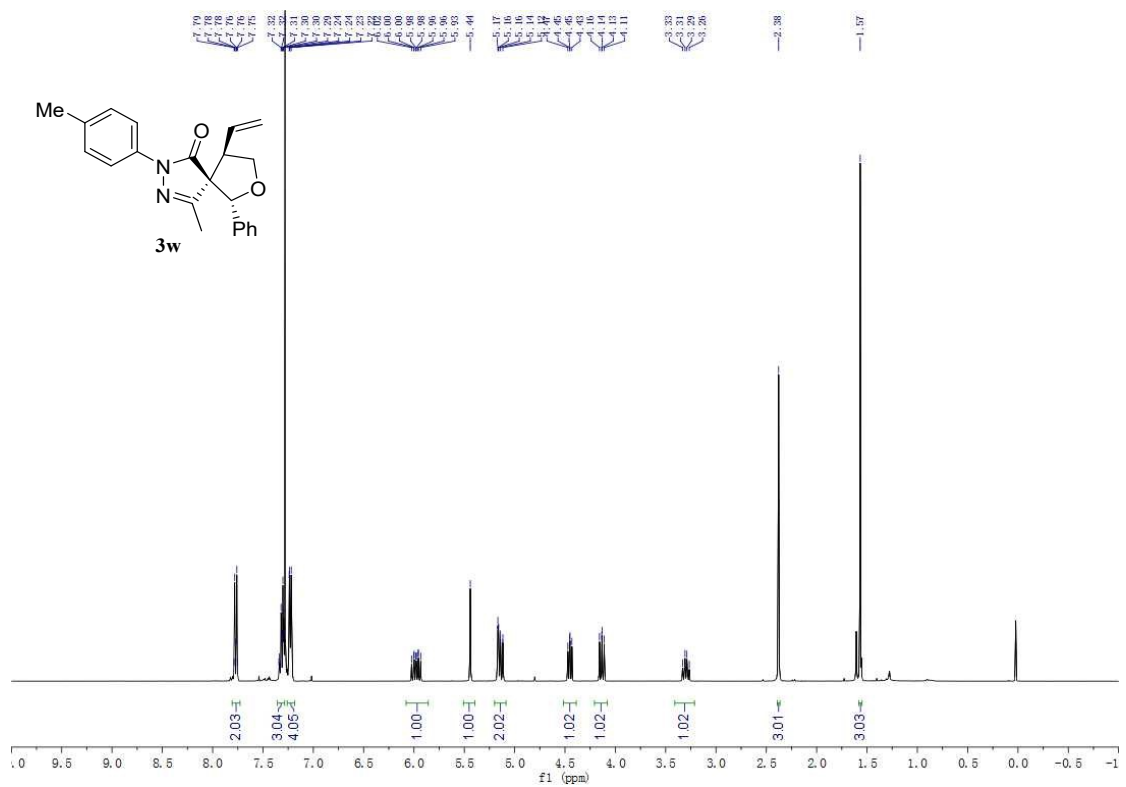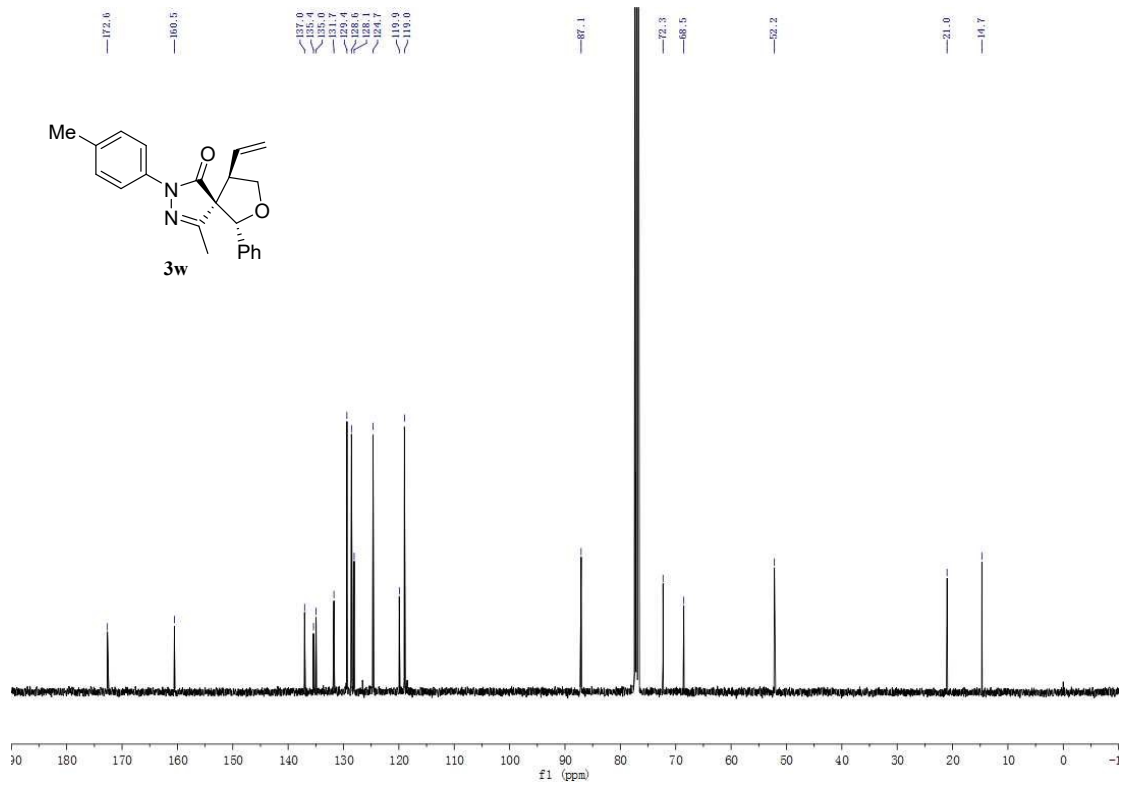

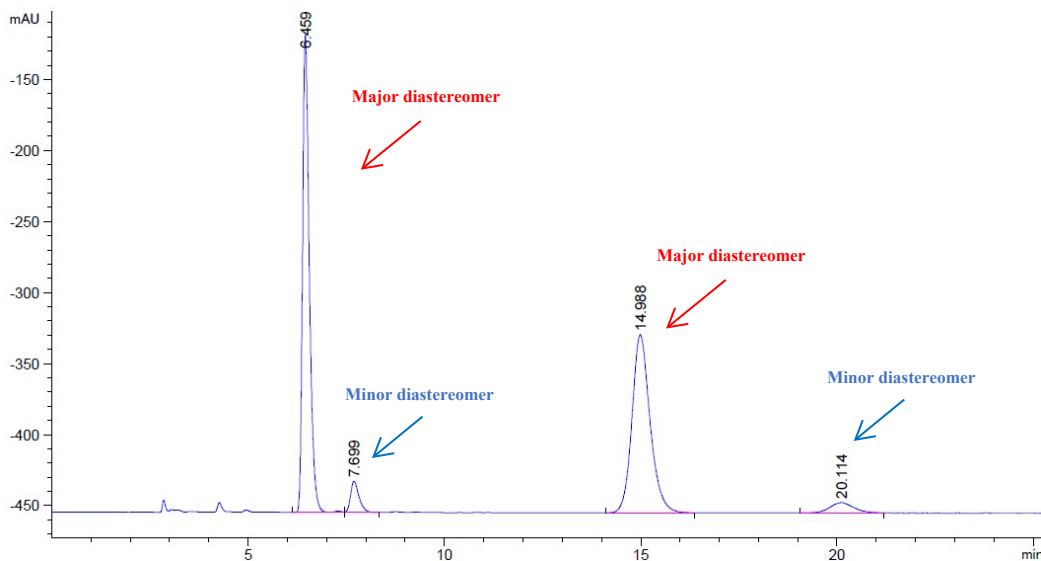

| Peak # | RetTime [min] | Type | Width [min] | Area [mAU*s] | Height [mAU] | Area %  |
|--------|---------------|------|-------------|--------------|--------------|---------|
| 1      | 6.459         | BV R | 0.1813      | 4046.92871   | 336.46686    | 46.3834 |
| 2      | 7.699         | VB   | 0.2248      | 331.65207    | 22.14004     | 3.8012  |
| 3      | 14.988        | BB   | 0.4858      | 4032.69336   | 125.52077    | 46.2202 |
| 4      | 20.114        | BB   | 0.6370      | 313.67917    | 7.30413      | 3.5952  |

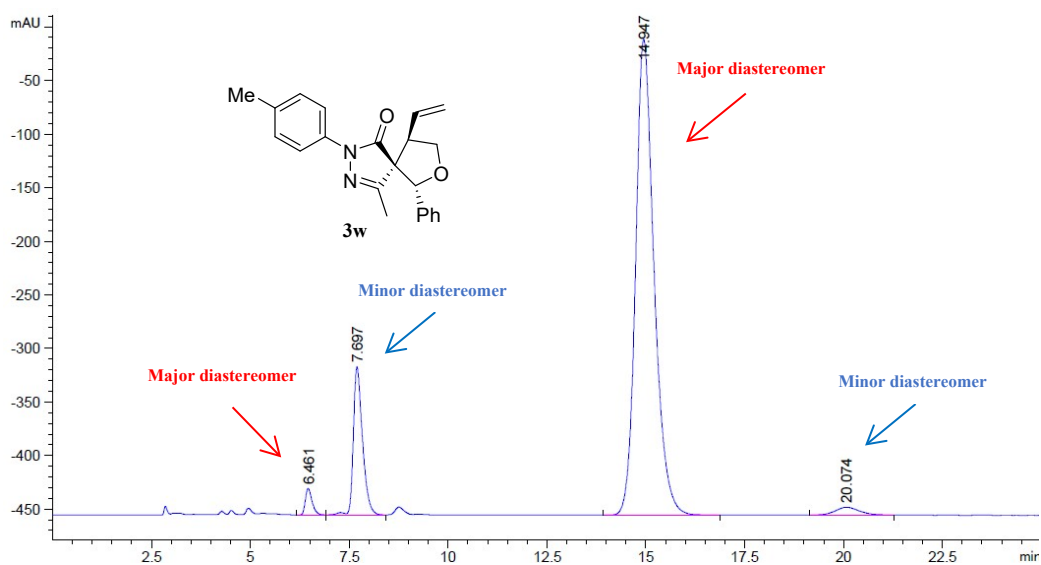

| Peak # | RetTime [min] | Type | Width [min] | Area [mAU*s] | Height [mAU] | Area %  |
|--------|---------------|------|-------------|--------------|--------------|---------|
| 1      | 6.461         | BB   | 0.1795      | 294.70245    | 24.82700     | 1.7092  |
| 2      | 7.697         | VB R | 0.2354      | 2218.00024   | 138.29692    | 12.8636 |
| 3      | 14.947        | BB   | 0.4873      | 1.44102e4    | 444.45917    | 83.5739 |
| 4      | 20.074        | BB   | 0.6302      | 319.56622    | 7.45342      | 1.8534  |

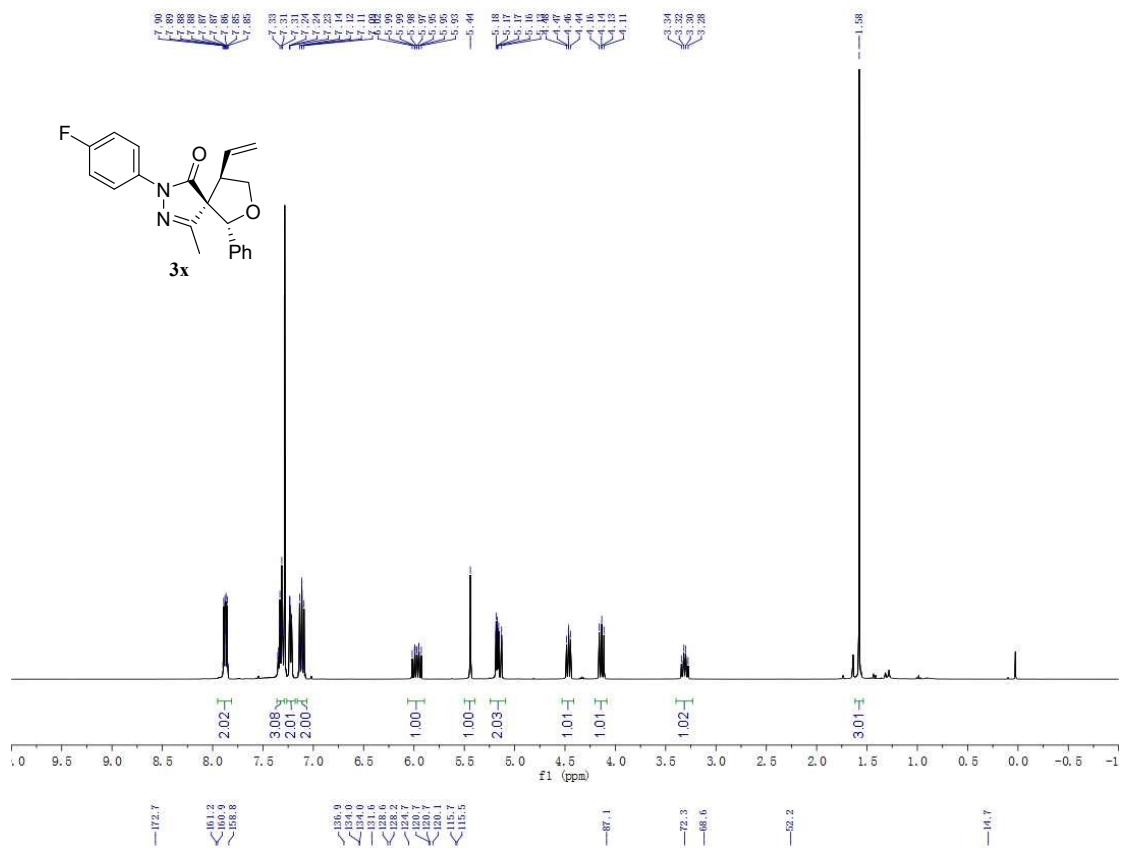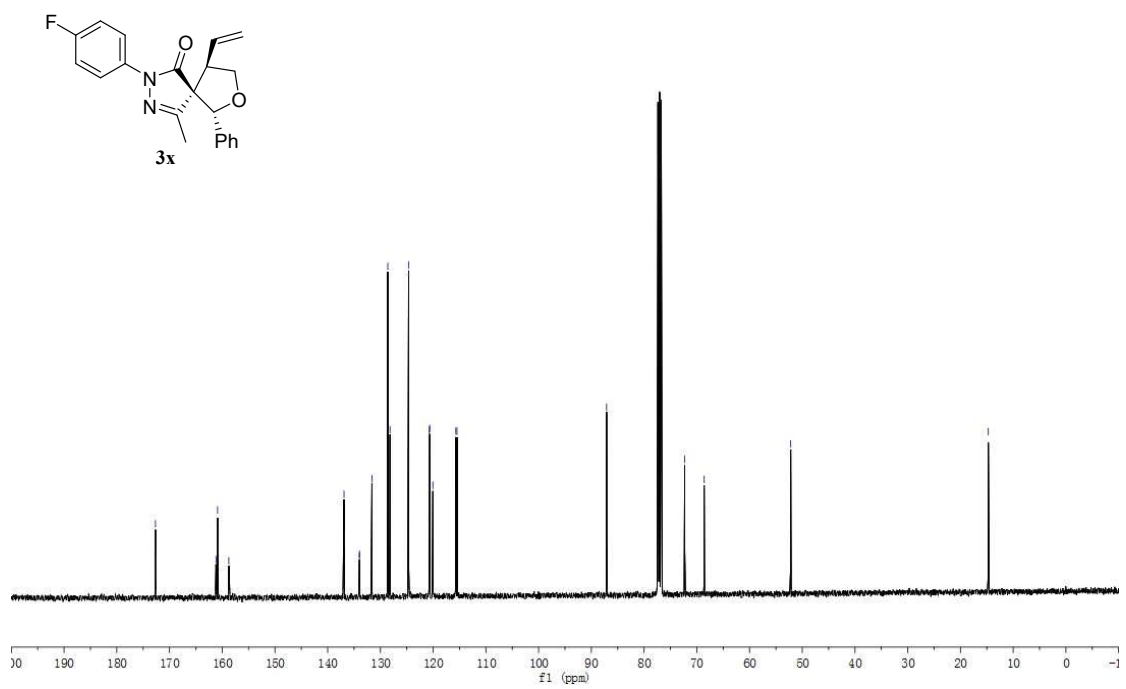



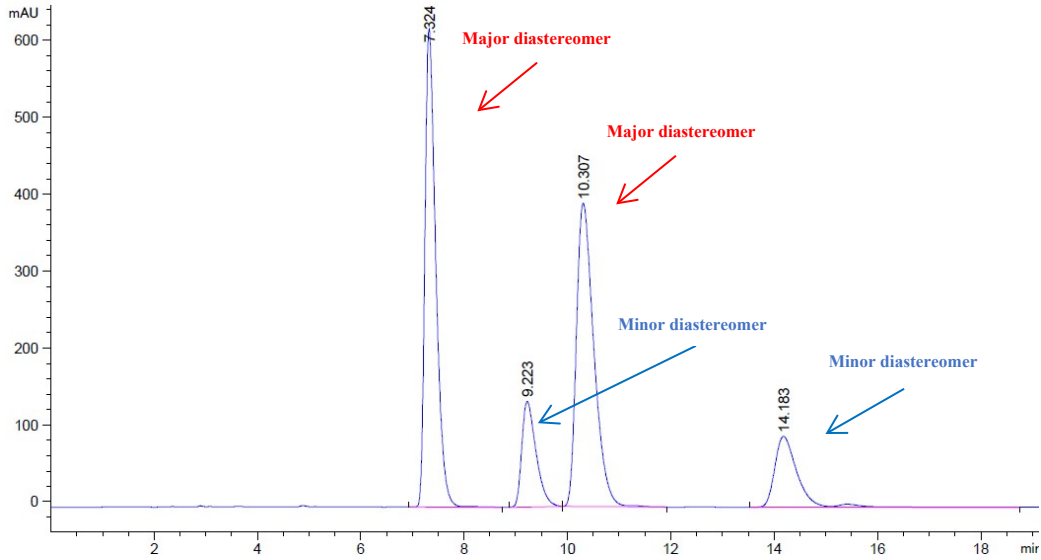

| Peak # | RetTime [min] | Type | Width [min] | Area [mAU*s] | Height [mAU] | Area %  |
|--------|---------------|------|-------------|--------------|--------------|---------|
| 1      | 7.324         | BV R | 0.2220      | 9063.75195   | 620.75916    | 38.1754 |
| 2      | 9.223         | BB   | 0.2912      | 2622.20996   | 137.07372    | 11.0444 |
| 3      | 10.307        | BV R | 0.3568      | 9252.33887   | 394.23352    | 38.9697 |
| 4      | 14.183        | BV R | 0.4429      | 2804.11353   | 92.12141     | 11.8106 |

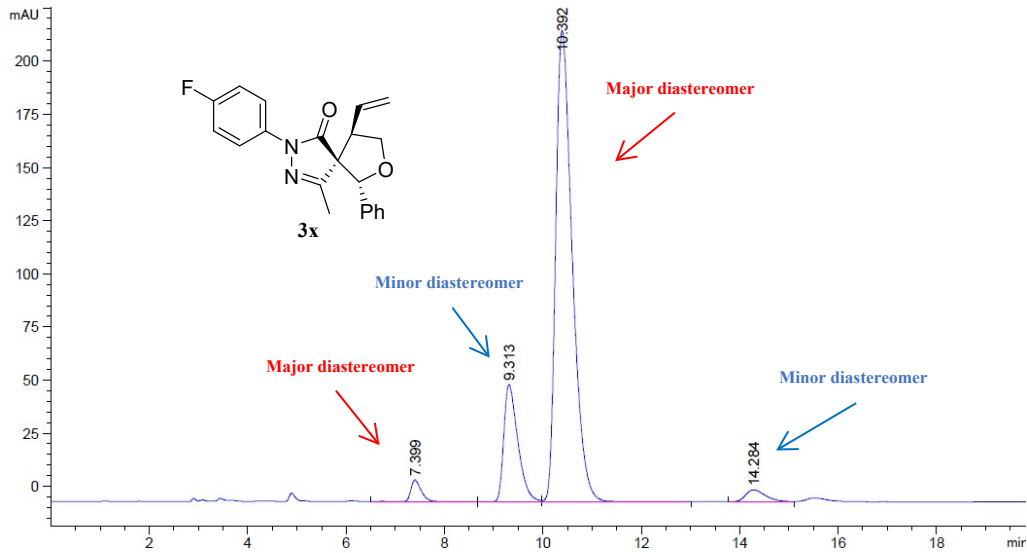

| Peak # | RetTime [min] | Type | Width [min] | Area [mAU*s] | Height [mAU] | Area %  |
|--------|---------------|------|-------------|--------------|--------------|---------|
| 1      | 7.399         | VV R | 0.2173      | 152.11389    | 10.24701     | 2.3147  |
| 2      | 9.313         | BV   | 0.2991      | 1091.17554   | 55.07583     | 16.6044 |
| 3      | 10.392        | VB   | 0.3562      | 5169.67822   | 221.54630    | 78.6670 |
| 4      | 14.284        | BV   | 0.4297      | 158.62973    | 5.61250      | 2.4139  |

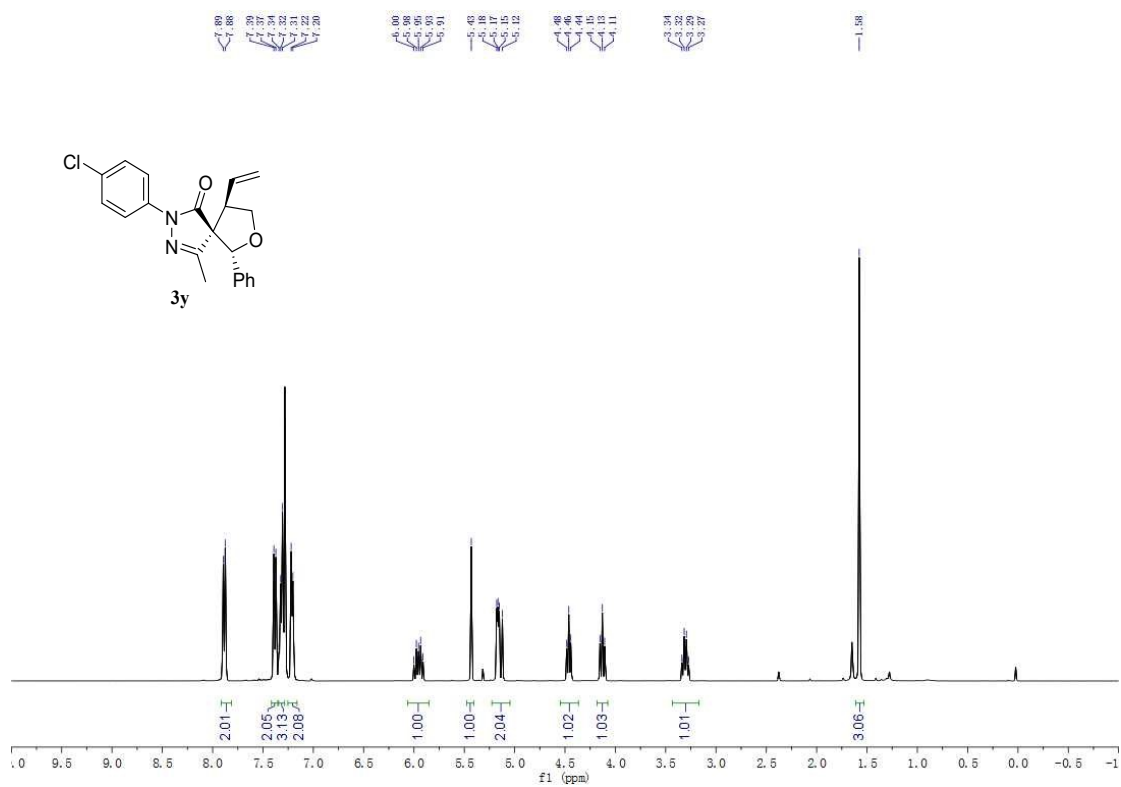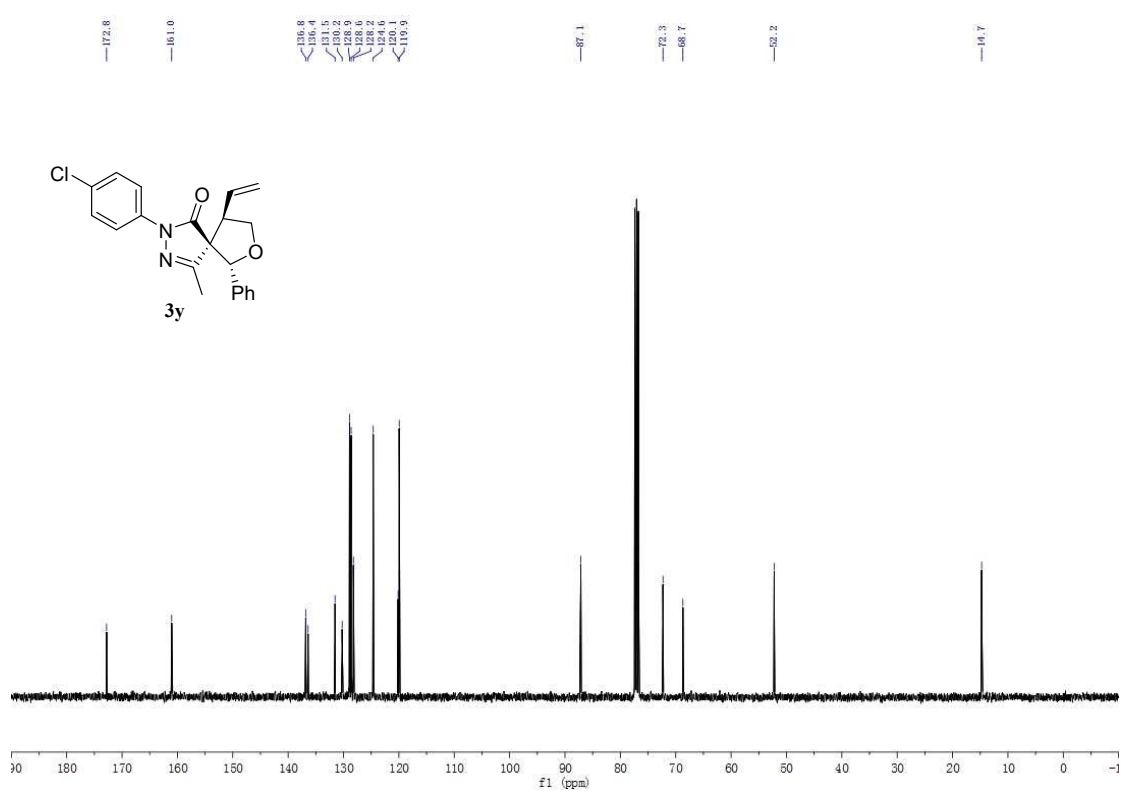

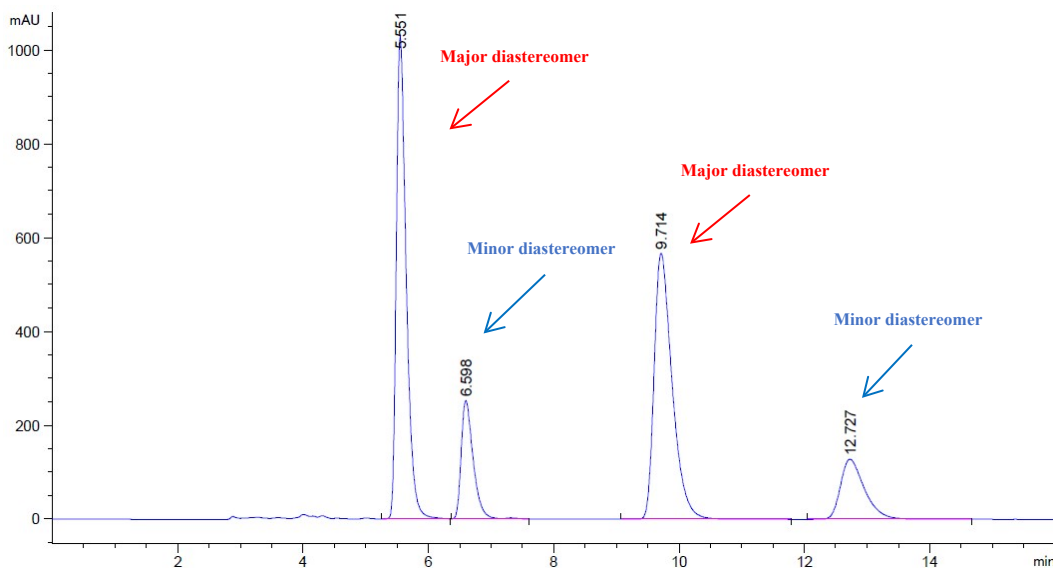

| Peak # | RetTime [min] | Type | Width [min] | Area [mAU*s] | Height [mAU] | Area %  |
|--------|---------------|------|-------------|--------------|--------------|---------|
| 1      | 5.551         | BB   | 0.1659      | 1.12888e4    | 1030.03174   | 38.4384 |
| 2      | 6.598         | BV R | 0.1977      | 3359.40308   | 252.82301    | 11.4388 |
| 3      | 9.714         | BV R | 0.3028      | 1.13226e4    | 567.31915    | 38.5536 |
| 4      | 12.727        | BV R | 0.4032      | 3397.67334   | 128.12959    | 11.5692 |

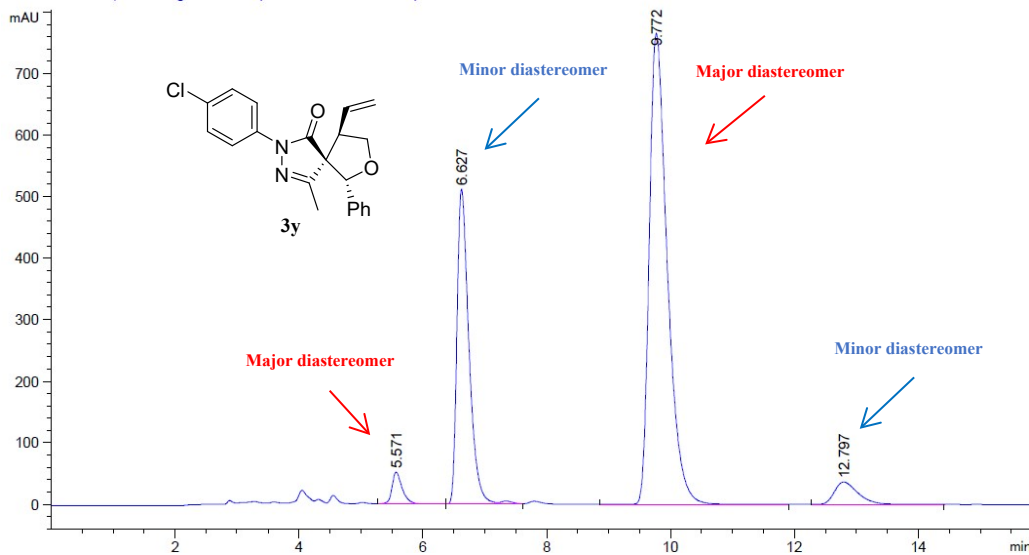

| Peak # | RetTime [min] | Type | Width [min] | Area [mAU*s] | Height [mAU] | Area %  |
|--------|---------------|------|-------------|--------------|--------------|---------|
| 1      | 5.571         | BV R | 0.1711      | 596.71613    | 51.79629     | 2.4971  |
| 2      | 6.627         | BV R | 0.2018      | 6879.79932   | 511.78470    | 28.7907 |
| 3      | 9.772         | BV R | 0.3073      | 1.54481e4    | 766.03033    | 64.6476 |
| 4      | 12.797        | BV R | 0.4065      | 971.27191    | 36.47309     | 4.0646  |

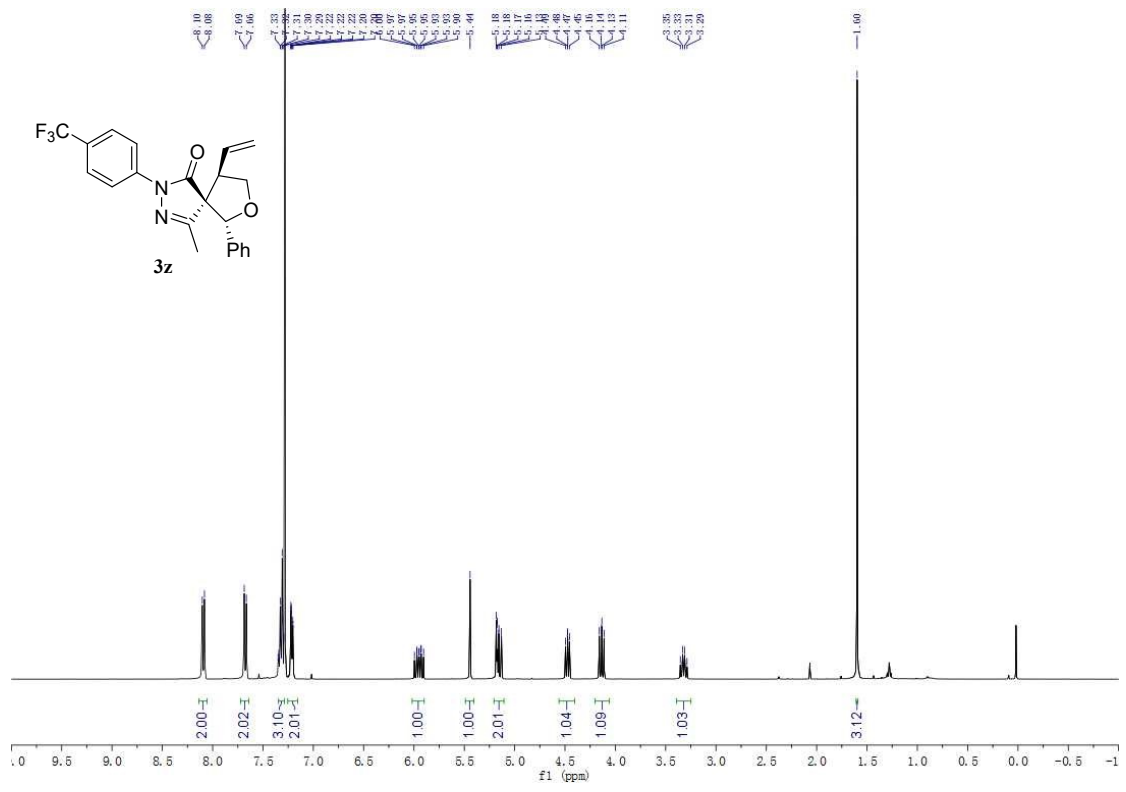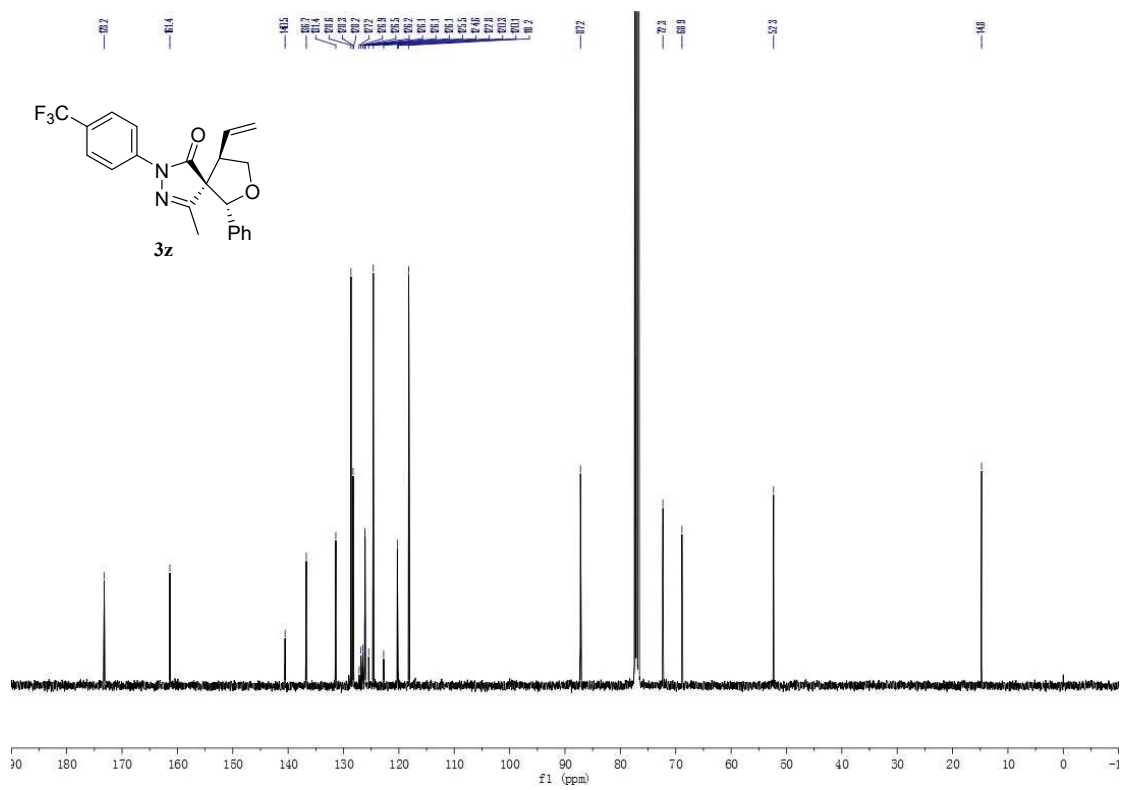

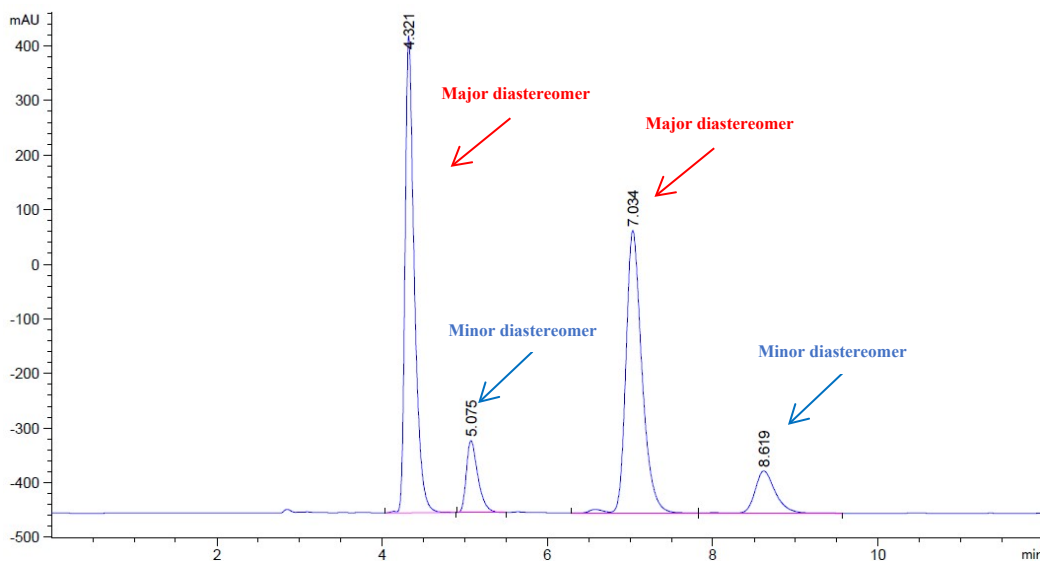

| Peak # | RetTime [min] | Type | Width [min] | Area [mAU*s] | Height [mAU] | Area %  |
|--------|---------------|------|-------------|--------------|--------------|---------|
| 1      | 4.321         | VB R | 0.1162      | 6842.07178   | 874.00989    | 41.6687 |
| 2      | 5.075         | BB   | 0.1474      | 1284.56775   | 132.16942    | 7.8231  |
| 3      | 7.034         | VB R | 0.2018      | 6988.04590   | 517.52673    | 42.5577 |
| 4      | 8.619         | VB R | 0.2548      | 1305.50085   | 77.37661     | 7.9506  |

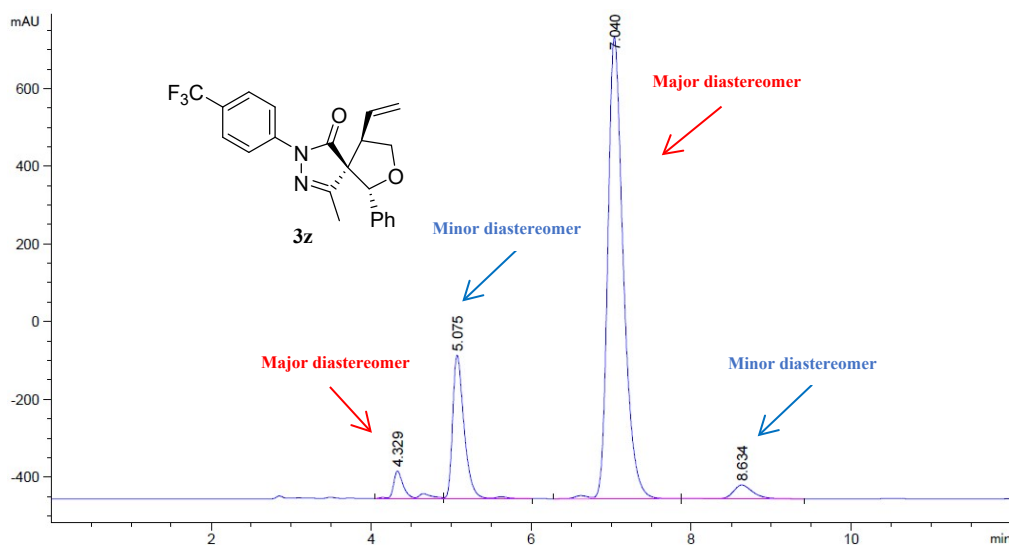

| Peak # | RetTime [min] | Type | Width [min] | Area [mAU*s] | Height [mAU] | Area %  |
|--------|---------------|------|-------------|--------------|--------------|---------|
| 1      | 4.329         | VV R | 0.1203      | 727.81238    | 71.08894     | 3.4533  |
| 2      | 5.075         | VV R | 0.1489      | 3694.73047   | 369.75967    | 17.5308 |
| 3      | 7.040         | VB R | 0.2037      | 1.60572e4    | 1188.69604   | 76.1882 |
| 4      | 8.634         | VB R | 0.2541      | 595.96979    | 35.26865     | 2.8278  |

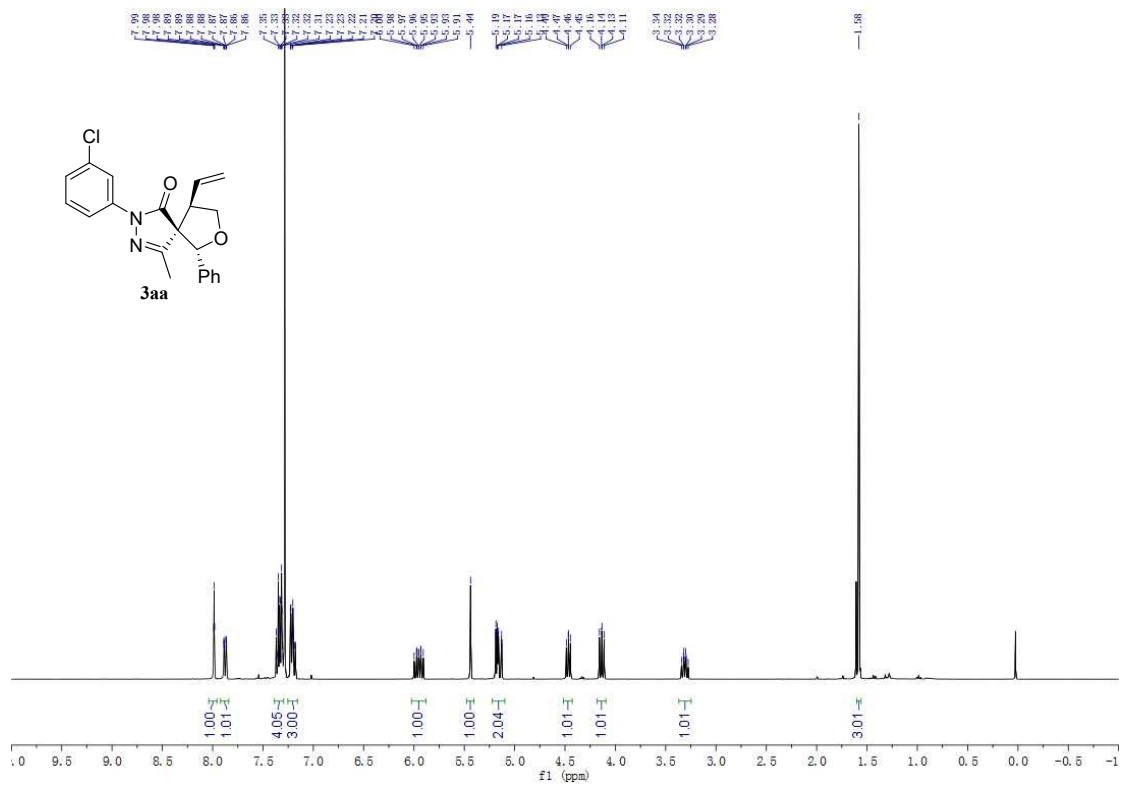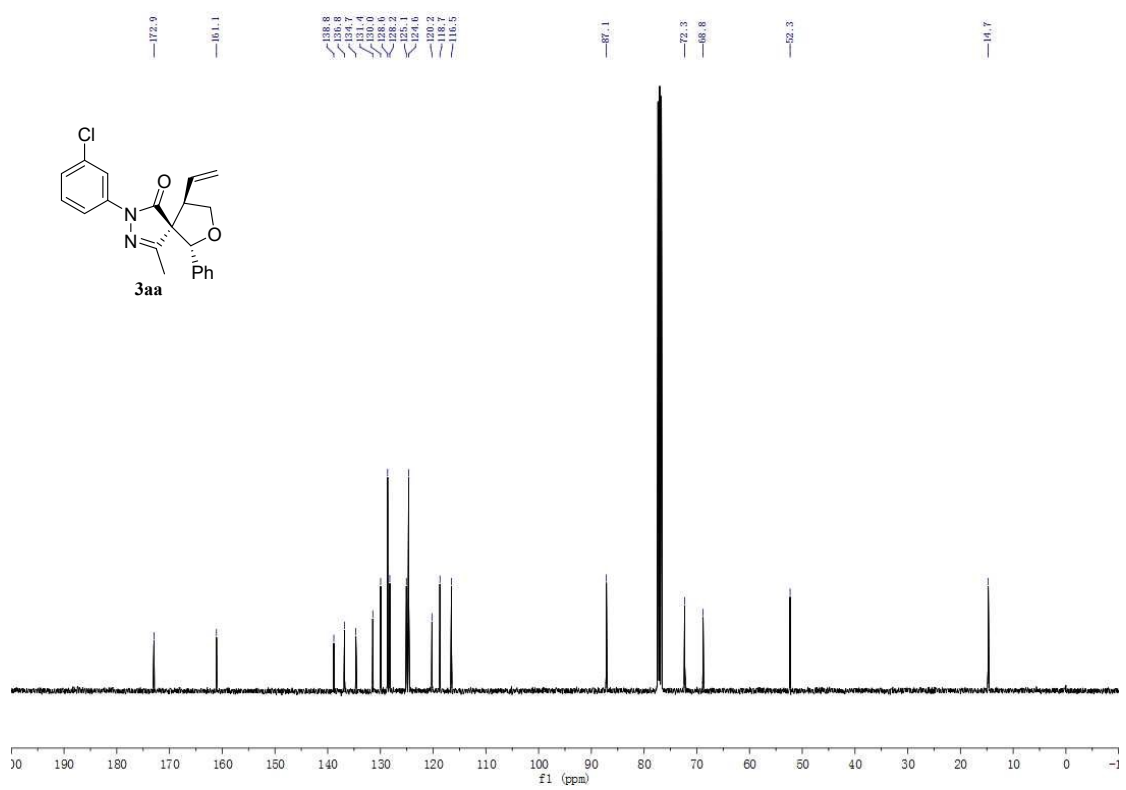

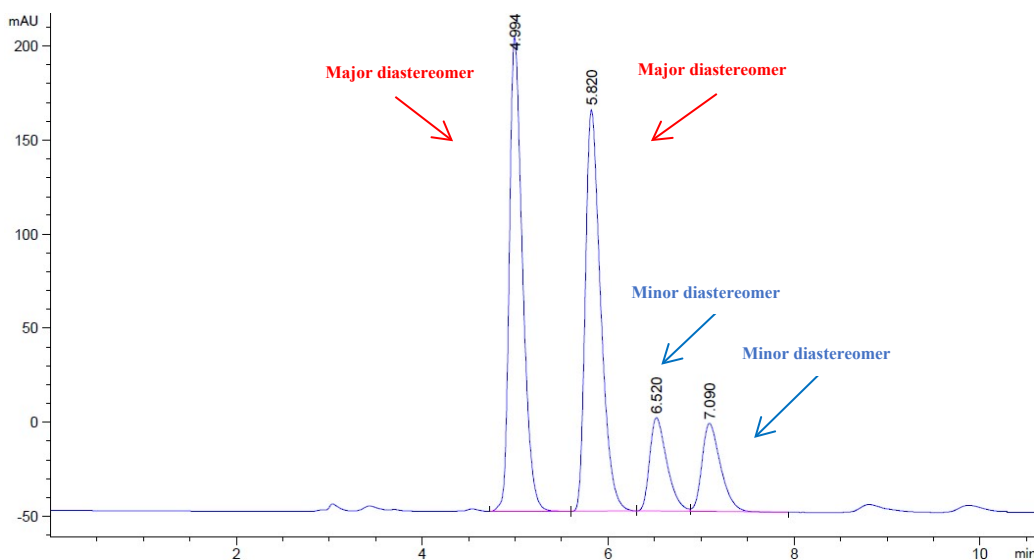

| Peak # | RetTime [min] | Type | Width [min] | Area [mAU*s] | Height [mAU] | Area %  |
|--------|---------------|------|-------------|--------------|--------------|---------|
| 1      | 4.994         | VB   | 0.1488      | 2481.94971   | 252.20412    | 39.8237 |
| 2      | 5.820         | BB   | 0.1751      | 2452.52588   | 213.43100    | 39.3516 |
| 3      | 6.520         | BV   | 0.1959      | 642.70502    | 49.68326     | 10.3124 |
| 4      | 7.090         | VB   | 0.2108      | 655.15601    | 46.94535     | 10.5122 |

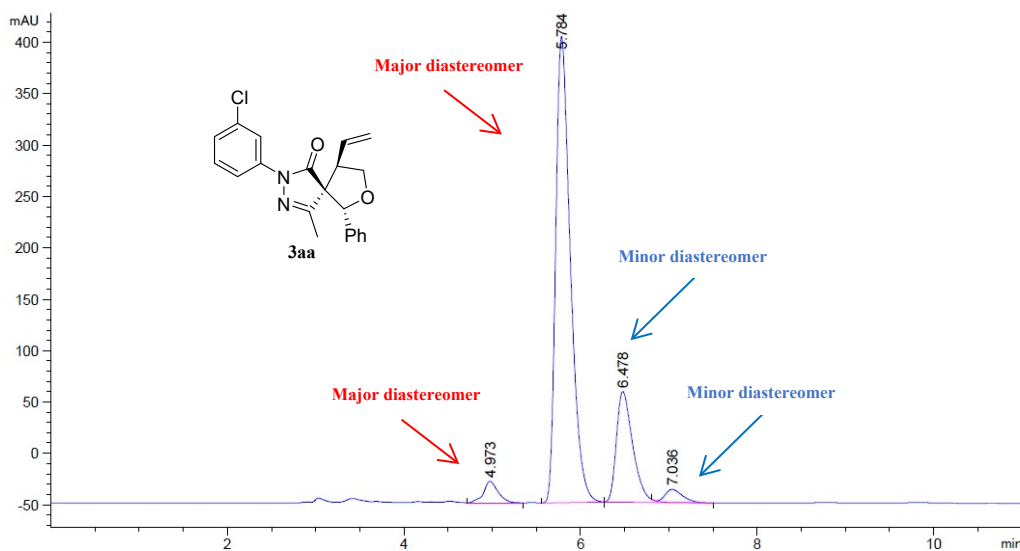

| Peak # | RetTime [min] | Type | Width [min] | Area [mAU*s] | Height [mAU] | Area %  |
|--------|---------------|------|-------------|--------------|--------------|---------|
| 1      | 4.973         | BB   | 0.1673      | 239.26764    | 20.94613     | 3.4041  |
| 2      | 5.784         | BB   | 0.1746      | 5231.60205   | 453.61728    | 74.4299 |
| 3      | 6.478         | BV R | 0.1947      | 1382.15759   | 107.69213    | 19.6639 |
| 4      | 7.036         | VB E | 0.2088      | 175.87035    | 12.75713     | 2.5021  |

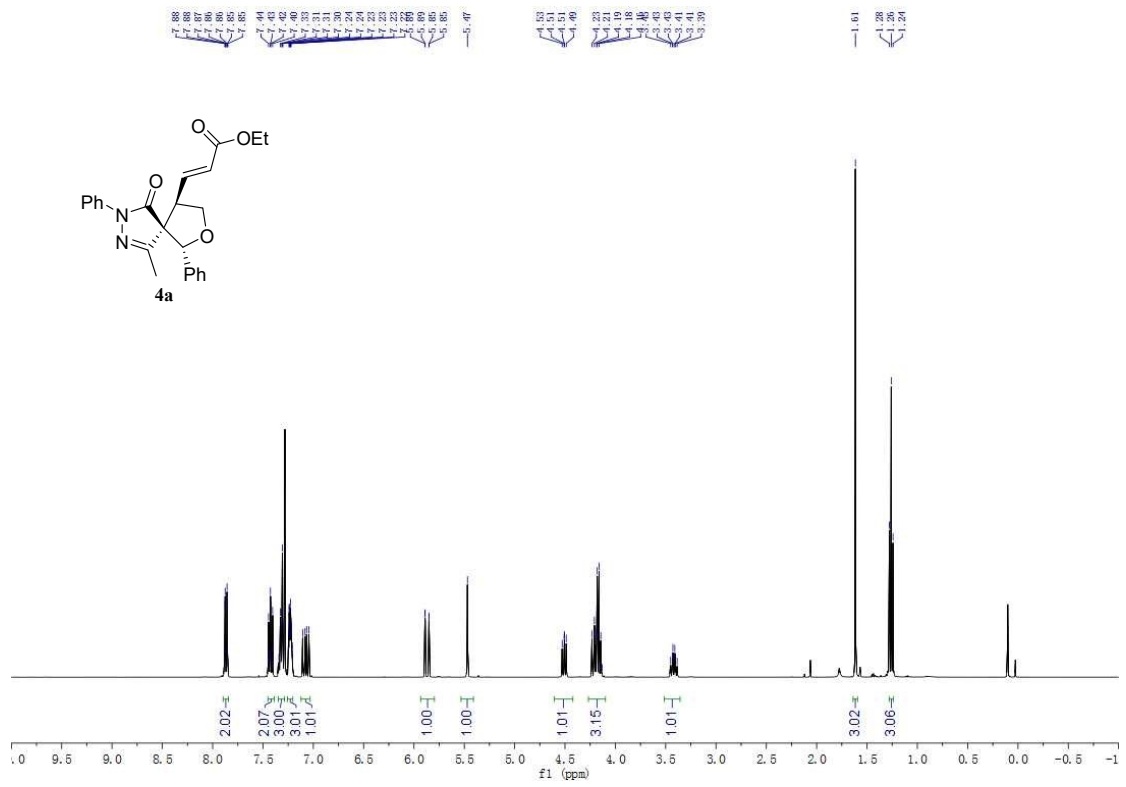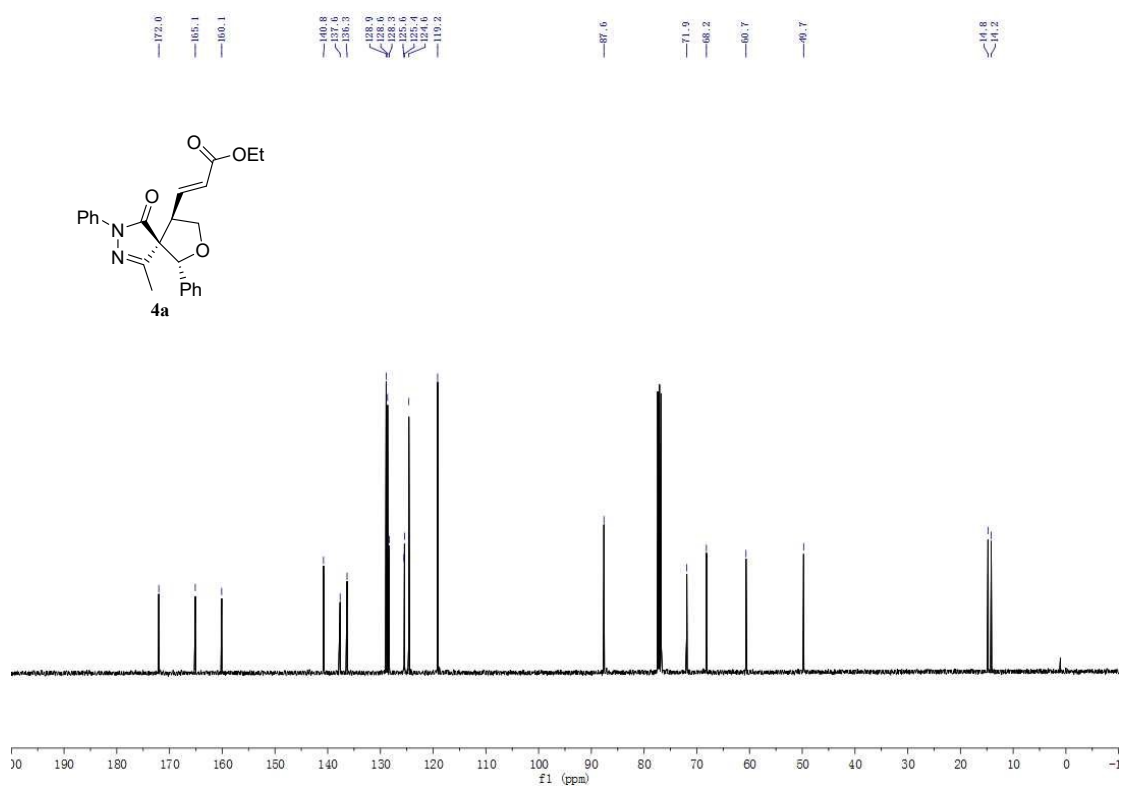



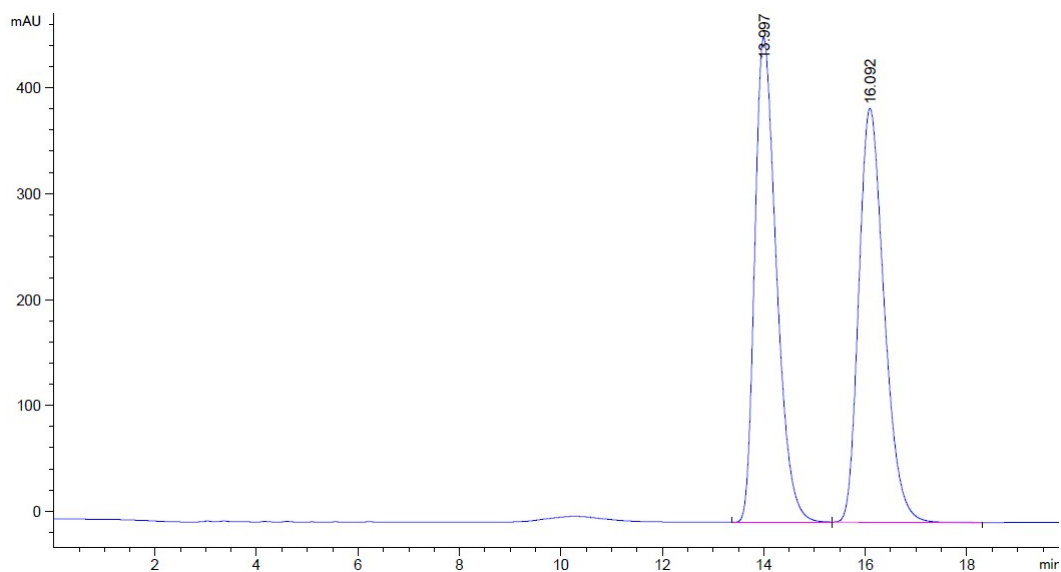

| Peak # | RetTime [min] | Type | Width [min] | Area [mAU*s] | Height [mAU] | Area %  |
|--------|---------------|------|-------------|--------------|--------------|---------|
| 1      | 13.997        | BB   | 0.4573      | 1.35937e4    | 457.98962    | 50.0463 |
| 2      | 16.092        | BB   | 0.5369      | 1.35685e4    | 390.96564    | 49.9537 |

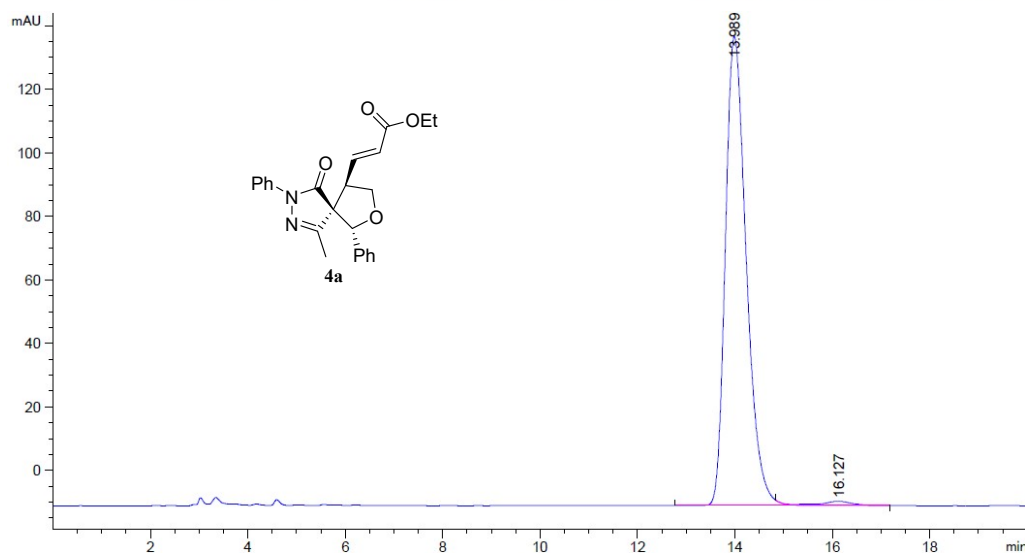

| Peak # | RetTime [min] | Type | Width [min] | Area [mAU*s] | Height [mAU] | Area %  |
|--------|---------------|------|-------------|--------------|--------------|---------|
| 1      | 13.989        | BV R | 0.4589      | 4391.33350   | 147.68993    | 98.5639 |
| 2      | 16.127        | VB E | 0.6857      | 63.98387     | 1.33856      | 1.4361  |

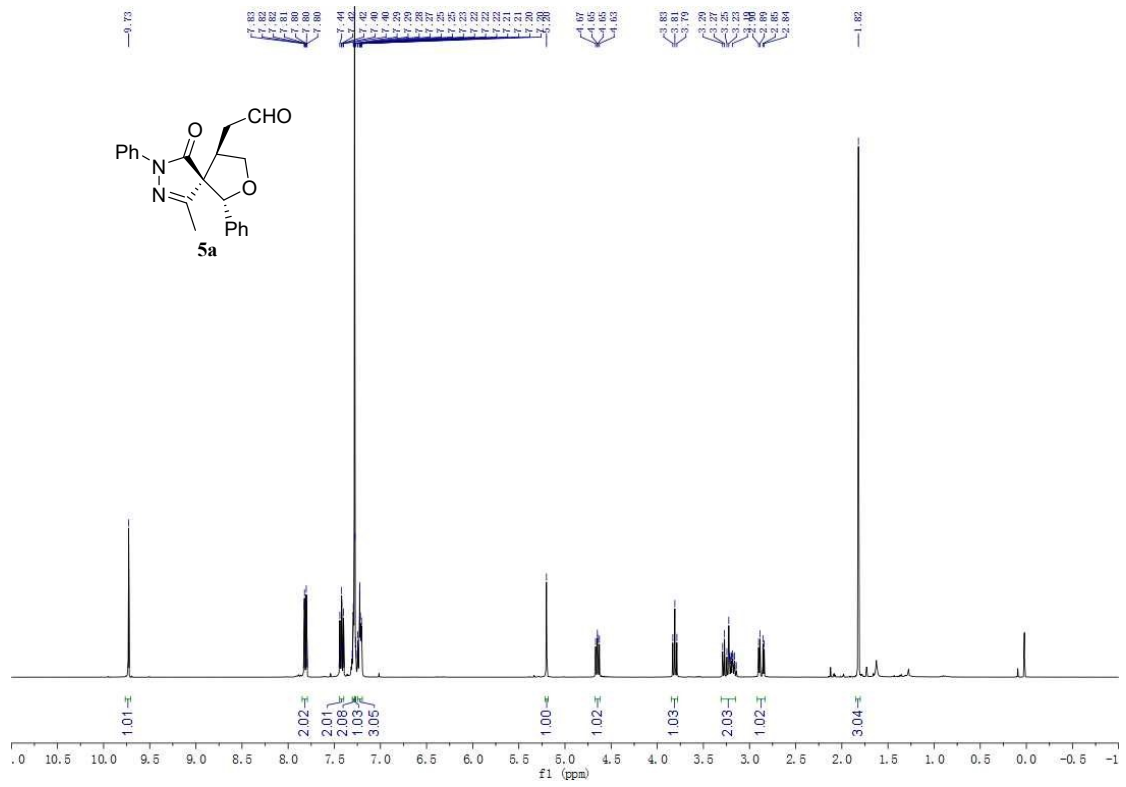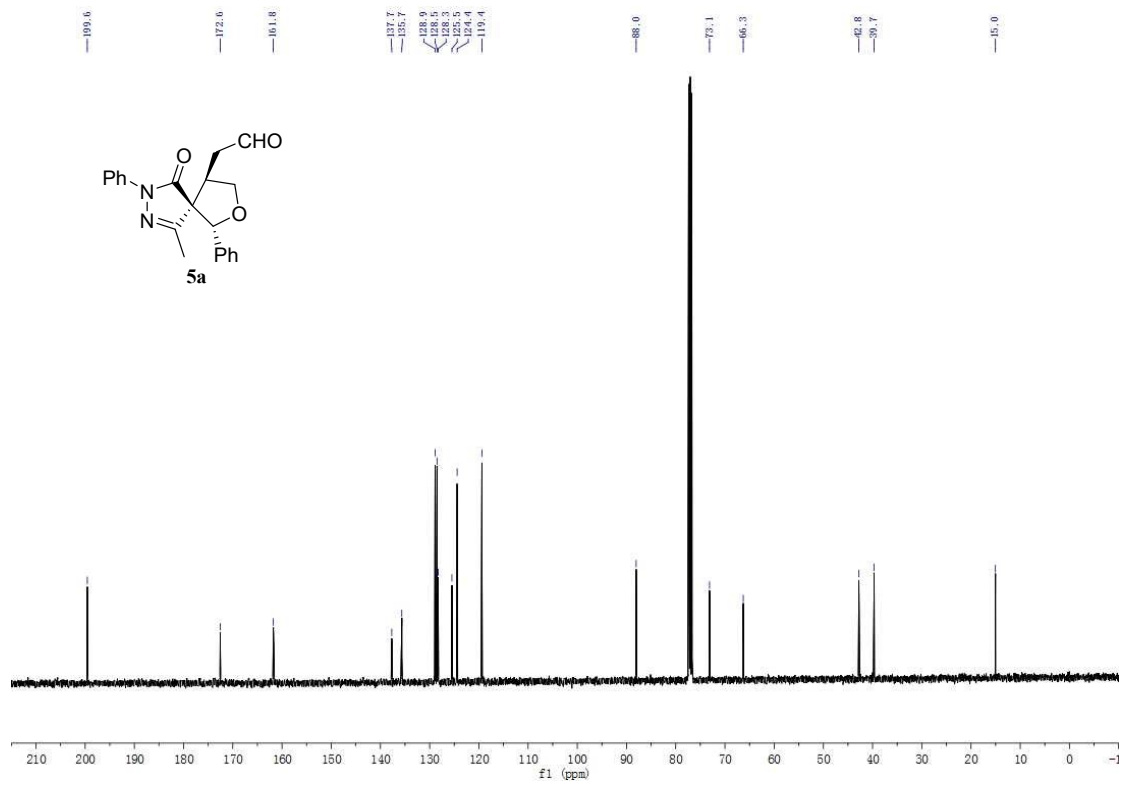

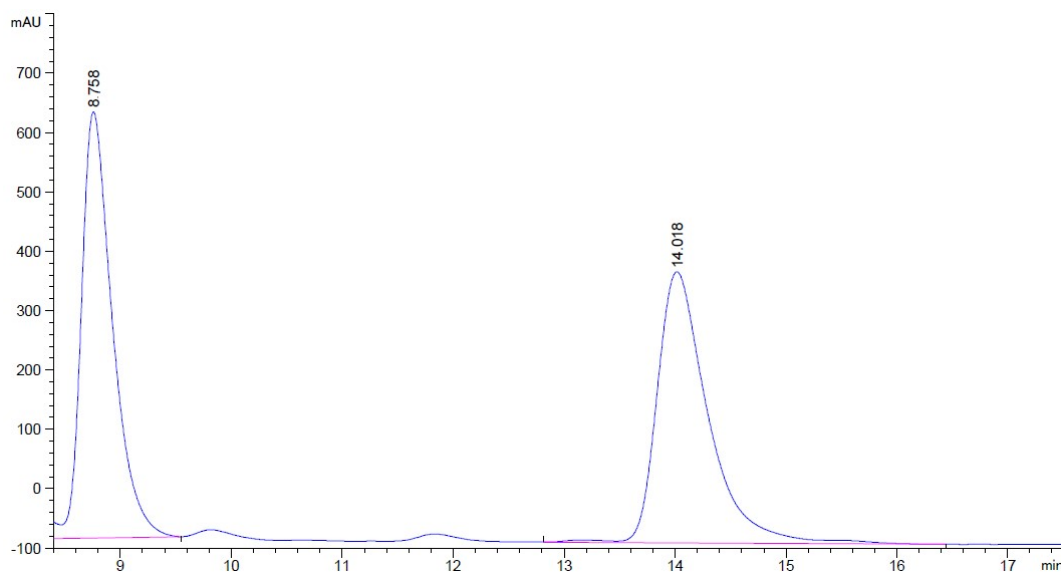

| Peak # | RetTime [min] | Type | Width [min] | Area [mAU*s] | Height [mAU] | Area %  |
|--------|---------------|------|-------------|--------------|--------------|---------|
| 1      | 8.758         | FM   | 0.3275      | 1.41071e4    | 717.99670    | 49.1596 |
| 2      | 14.018        | VB R | 0.4719      | 1.45894e4    | 456.79312    | 50.8404 |

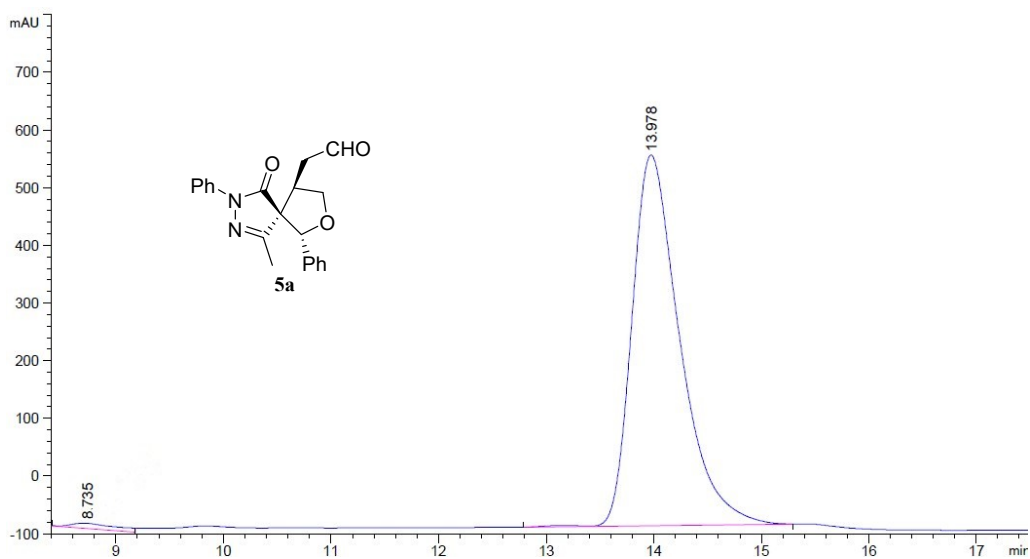

| Peak # | RetTime [min] | Type | Width [min] | Area [mAU*s] | Height [mAU] | Area %  |
|--------|---------------|------|-------------|--------------|--------------|---------|
| 1      | 8.735         | MM   | 0.5262      | 296.32031    | 9.38614      | 1.4737  |
| 2      | 13.978        | VB R | 0.4588      | 1.98114e4    | 642.40222    | 98.5263 |

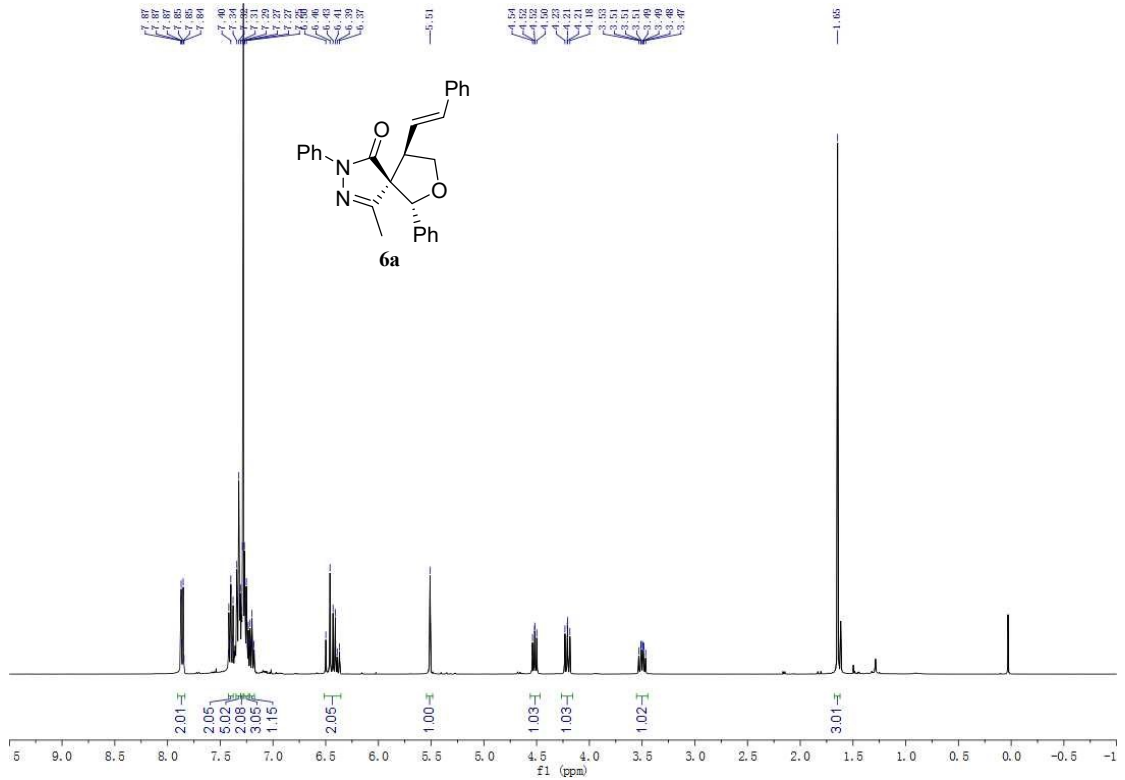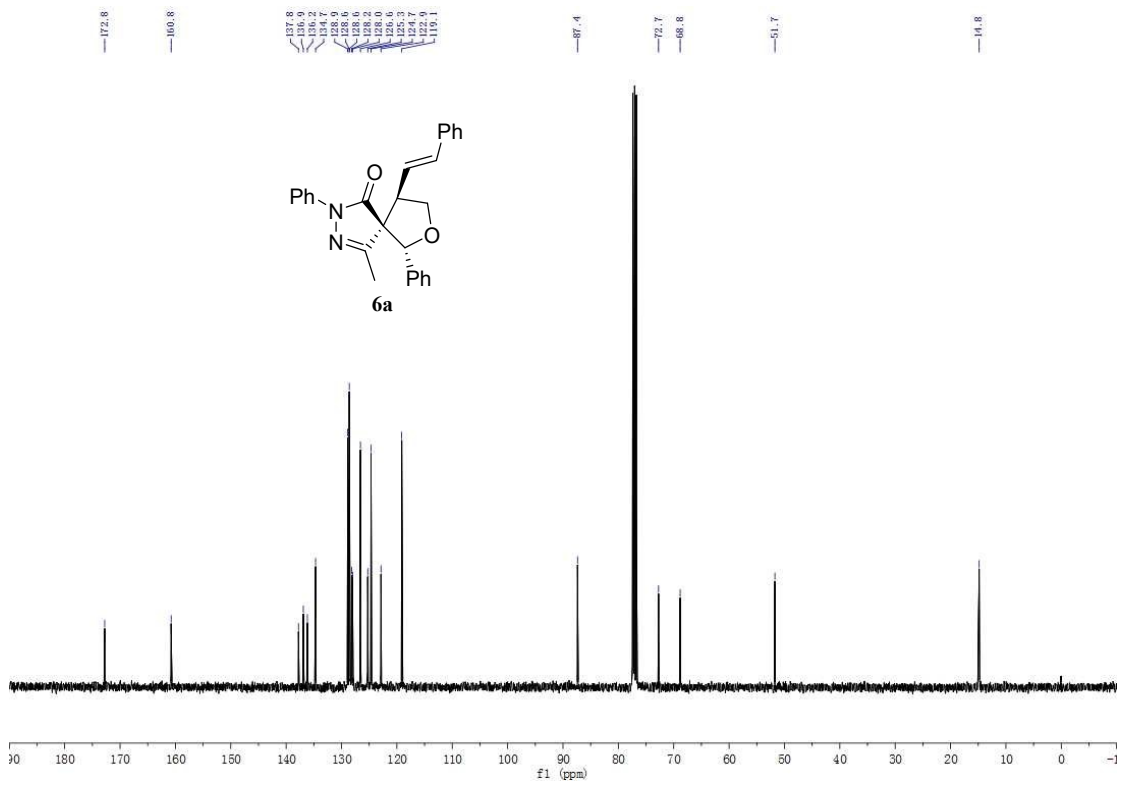

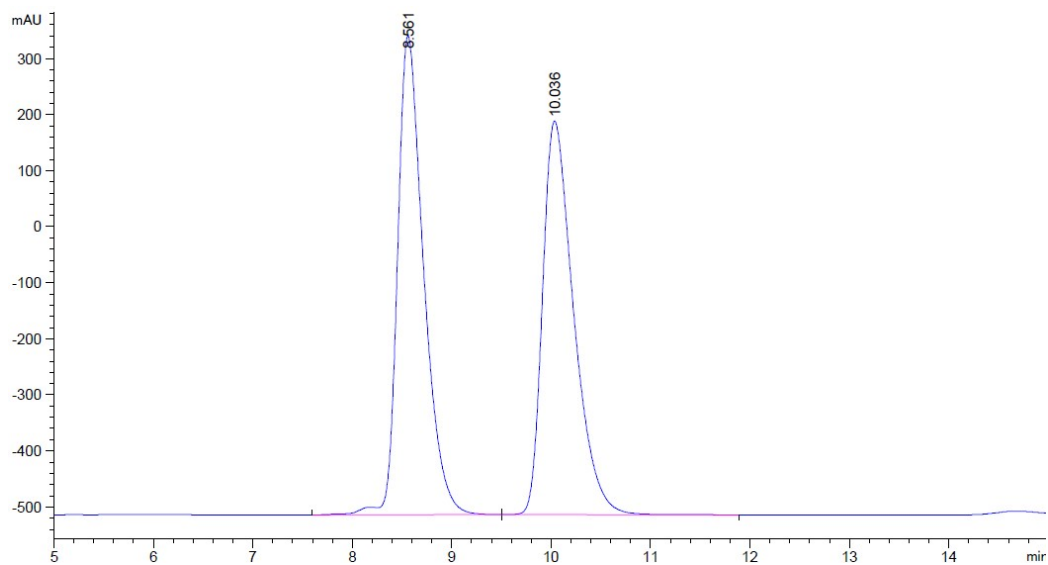

| Peak # | RetTime [min] | Type | Width [min] | Area [mAU*s] | Height [mAU] | Area %  |
|--------|---------------|------|-------------|--------------|--------------|---------|
| 1      | 8.561         | VB R | 0.2746      | 1.56064e4    | 853.96558    | 50.6157 |
| 2      | 10.036        | BB   | 0.3291      | 1.52267e4    | 701.83221    | 49.3843 |

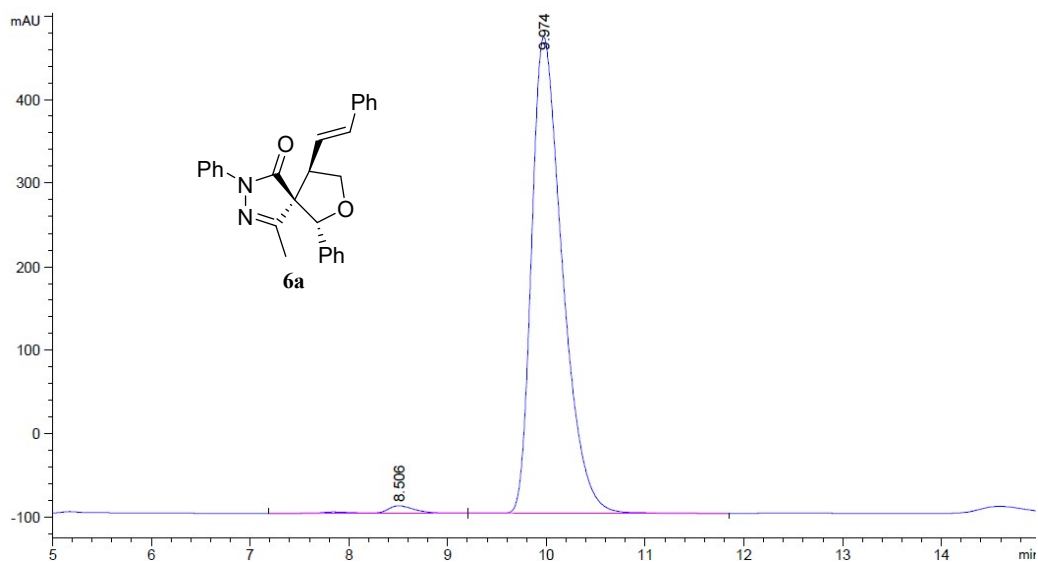

| Peak # | RetTime [min] | Type | Width [min] | Area [mAU*s] | Height [mAU] | Area %  |
|--------|---------------|------|-------------|--------------|--------------|---------|
| 1      | 8.506         | VB R | 0.2768      | 198.36057    | 9.07093      | 1.5819  |
| 2      | 9.974         | BB   | 0.3288      | 1.23412e4    | 569.57239    | 98.4181 |

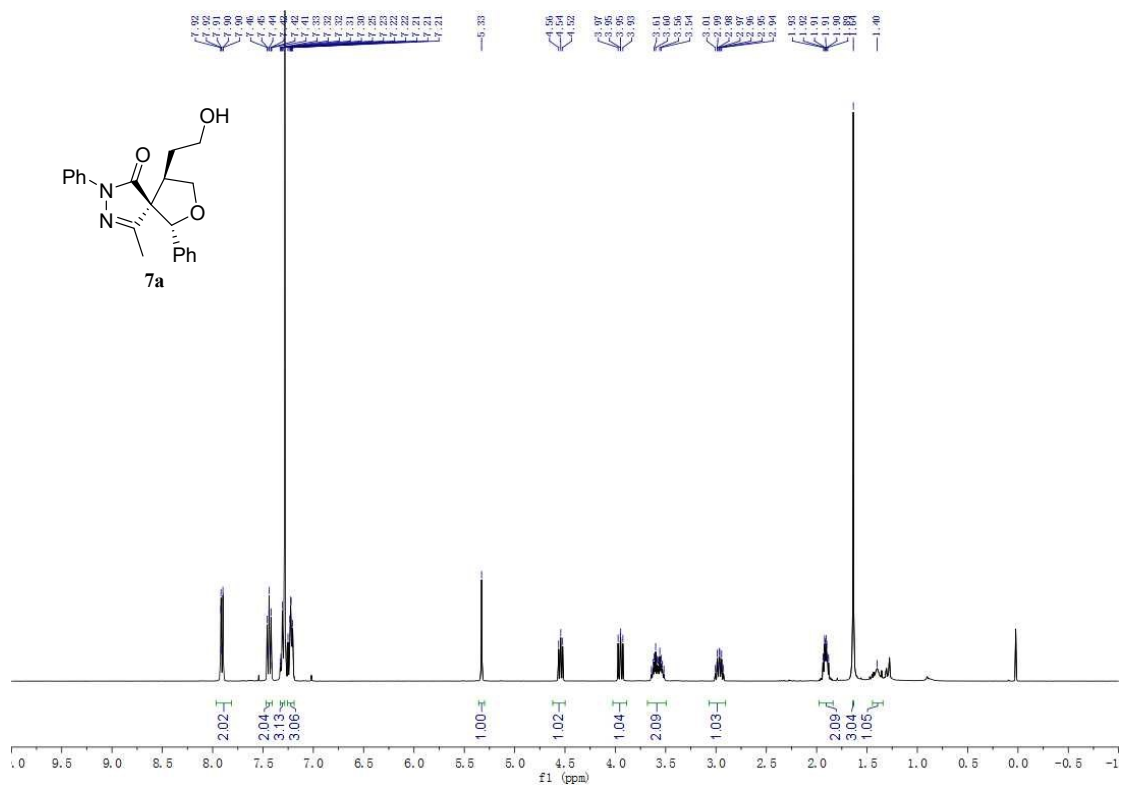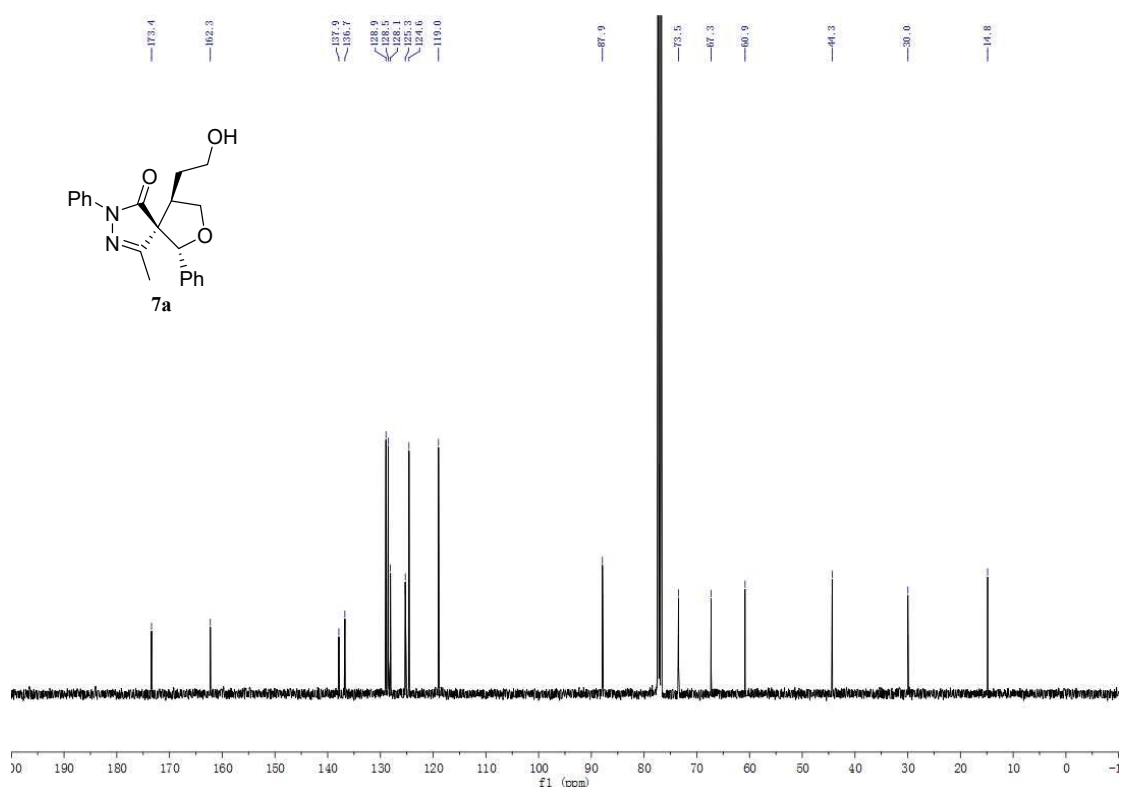

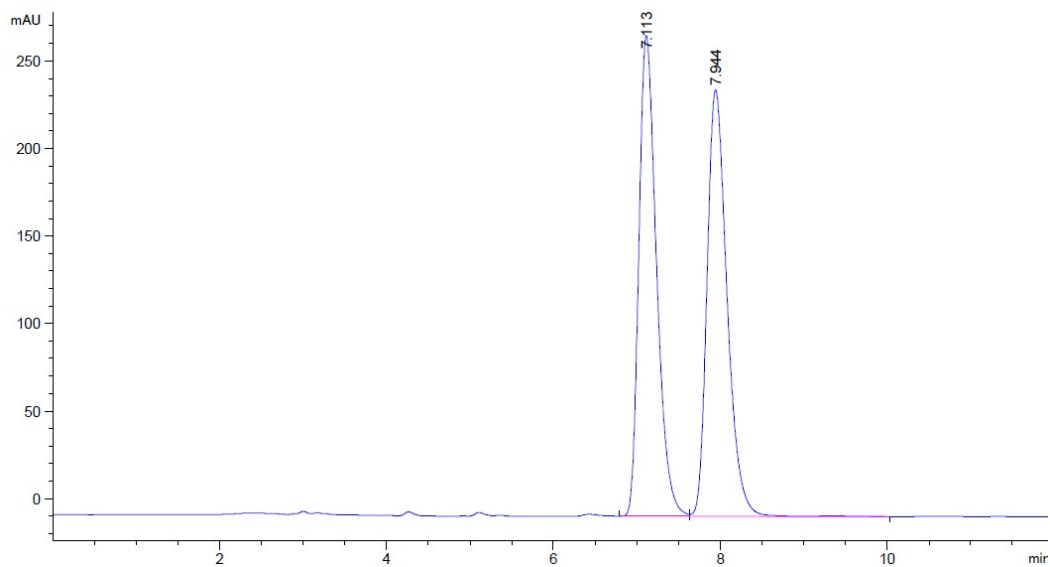

| Peak # | RetTime [min] | Type | Width [min] | Area [mAU*s] | Height [mAU] | Area %  |
|--------|---------------|------|-------------|--------------|--------------|---------|
| 1      | 7.113         | BV   | 0.2237      | 4033.87573   | 274.01920    | 49.9269 |
| 2      | 7.944         | VV R | 0.2535      | 4045.69189   | 243.37596    | 50.0731 |

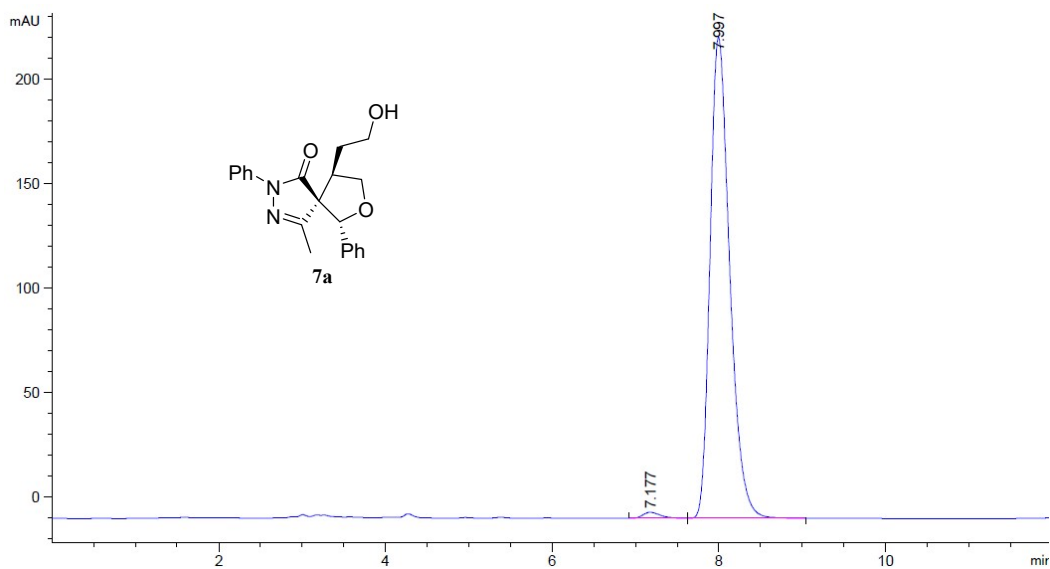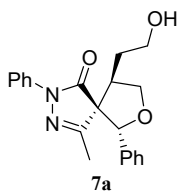

| Peak # | RetTime [min] | Type | Width [min] | Area [mAU*s] | Height [mAU] | Area %  |
|--------|---------------|------|-------------|--------------|--------------|---------|
| 1      | 7.177         | BV   | 0.2225      | 42.35038     | 2.89731      | 1.1115  |
| 2      | 7.997         | VB   | 0.2508      | 3767.88745   | 230.35110    | 98.8885 |
